# Supplementary material
Source: PubMed Central journal article supplement (PMC3411881)
Supplement: NIHMS390963-supplement-1_si_001.pdf [file NIHMS390963-supplement-1_si_001.pdf]

## SUPPORTING INFORMATION

to:

### *meso*-Arylporpholactones and their Reduction Products

Christian Brückner<sup>†,\*</sup>, Junichi Ogikubo<sup>†</sup>, Jason R. McCarthy<sup>†,‡</sup>,  
Joshua Akhigbe<sup>†</sup>, Michael A. Hyland<sup>†</sup>, Pedro Daddario<sup>†</sup>, Jill L. Worlinsky<sup>†</sup>,  
Matthias Zeller<sup>§</sup>, James T. Engle,<sup>¶</sup> Christopher J. Ziegler,<sup>¶</sup>  
Matthew J. Ranaghan<sup>&</sup>, Megan N. Sandberg<sup>†</sup>, and Robert R. Birge<sup>†,&</sup>

Department of Chemistry, University of Connecticut, Storrs, CT 06269-3060, United States.

Department of Molecular and Cell Biology, University of Connecticut, Storrs, CT 06269-3125,

United States. Department of Chemistry, Youngstown State University, One University Plaza,

Youngstown, OH 44555-3663, United States. Department of Chemistry, University of Akron,

Akron, OH 44325-3601, United States.

\* Author to whom correspondence should be addressed: Fax: (+1) 860 486-2981; Tel: (+1) 860 486-2743; e-mail: c.bruckner@uconn.edu

#### Table of Contents:

|                                                                                                                    |    |
|--------------------------------------------------------------------------------------------------------------------|----|
| <b>Figure S1.</b> <sup>1</sup> H NMR Spectrum (400 MHz, CDCl <sub>3</sub> ) of <b>5aH<sub>2</sub></b> .....        | 4  |
| <b>Figure S2.</b> <sup>13</sup> C NMR Spectrum (100 MHz, CDCl <sub>3</sub> ) of <b>5aH<sub>2</sub></b> .....       | 5  |
| <b>Figure S3.</b> FT-IR Spectrum (KBr) of <b>5aH<sub>2</sub></b> .....                                             | 6  |
| <b>Figure S4.</b> <sup>1</sup> H NMR Spectrum (400 MHz, CDCl <sub>3</sub> ) of <b>5aZn</b> .....                   | 7  |
| <b>Figure S5.</b> <sup>1</sup> H NMR (400 MHz, CDCl <sub>3</sub> + 10% MeOH-d <sub>4</sub> ) of <b>5aNi</b> .....  | 8  |
| <b>Figure S6.</b> <sup>13</sup> C NMR (100 MHz, CDCl <sub>3</sub> + 10% MeOH-d <sub>4</sub> ) of <b>5aNi</b> ..... | 8  |
| <b>Figure S7.</b> <sup>1</sup> H NMR Spectrum (400 MHz, CDCl <sub>3</sub> ) of <b>7bH<sub>2</sub></b> .....        | 9  |
| <b>Figure S8.</b> <sup>1</sup> H NMR Spectrum (400 MHz, CDCl <sub>3</sub> ) of <b>5bH<sub>2</sub></b> .....        | 10 |
| <b>Figure S9.</b> <sup>13</sup> C NMR Spectrum (100 MHz, CDCl <sub>3</sub> ) of <b>5bH<sub>2</sub></b> .....       | 11 |
| <b>Figure S10.</b> <sup>1</sup> H NMR Spectrum (400 MHz, CDCl <sub>3</sub> ) of <b>5cH<sub>2</sub></b> .....       | 12 |
| <b>Figure S11.</b> <sup>13</sup> C NMR Spectrum (100 MHz, CDCl <sub>3</sub> ) of <b>5cH<sub>2</sub></b> .....      | 13 |
| <b>Figure S12.</b> <sup>1</sup> H NMR Spectrum (400 MHz, CDCl <sub>3</sub> ) of <b>5dH<sub>2</sub></b> .....       | 14 |
| Figure S13. <sup>1</sup> H NMR (400 MHz, CDCl <sub>3</sub> ) of <b>5dNi</b> .....                                  | 15 |
| Figure S14. <sup>13</sup> C NMR Spectrum (100 MHz, CDCl <sub>3</sub> ) of <b>5dNi</b> .....                        | 16 |

|                    |                                                                                                                             |    |
|--------------------|-----------------------------------------------------------------------------------------------------------------------------|----|
| <b>Figure S15.</b> | $^1\text{H}$ NMR Spectrum (400 MHz, $\text{CDCl}_3$ ) of <b>7eH<sub>2</sub></b> .....                                       | 17 |
| <b>Figure S16.</b> | $^1\text{H}$ NMR Spectrum (400 MHz, $\text{CD}_2\text{Cl}_2$ ) of <b>5eH<sub>2</sub></b> .....                              | 18 |
| <b>Figure S17.</b> | $^1\text{H}$ NMR Spectrum (400 MHz, $\text{CDCl}_3$ ) of <b>5ePd</b> .....                                                  | 19 |
| <b>Figure S18.</b> | $^1\text{H}$ NMR Spectrum (400 MHz, $\text{CD}_2\text{Cl}_2$ ) of <b>5ePt</b> .....                                         | 20 |
| <b>Figure S19.</b> | $^1\text{H}$ NMR (400 MHz, $\text{CD}_2\text{Cl}_2$ ) of <b>7fH<sub>2</sub></b> .....                                       | 21 |
| <b>Figure S20.</b> | $^{13}\text{C}$ NMR Spectrum (100 MHz, $\text{CD}_2\text{Cl}_2$ ) of <b>7fH<sub>2</sub></b> .....                           | 22 |
| <b>Figure S21.</b> | $^1\text{H}$ NMR Spectrum (400 MHz, $\text{CDCl}_3$ ) of <b>5fH<sub>2</sub></b> .....                                       | 23 |
| <b>Figure S22.</b> | $^1\text{H}$ NMR Spectrum (400 MHz, $\text{CDCl}_3$ ) of <b>5fZn</b> .....                                                  | 24 |
| <b>Figure S23.</b> | $^{13}\text{C}$ NMR Spectrum (400 MHz, $\text{CDCl}_3$ ) of <b>5fZn</b> .....                                               | 24 |
| <b>Figure S24.</b> | $^1\text{H}$ NMR Spectrum (100 MHz, $\text{CDCl}_3$ ) of <b>9aZn</b> .....                                                  | 25 |
| <b>Figure S25.</b> | $^{13}\text{C}$ NMR Spectrum (100 MHz, $\text{CDCl}_3$ ) of <b>9aZn</b> .....                                               | 25 |
| <b>Figure S26.</b> | FT-IR Spectrum (KBr) of <b>9aZn</b> .....                                                                                   | 26 |
| <b>Figure S27.</b> | $^1\text{H}$ NMR Spectrum (100 MHz, $\text{CDCl}_3$ ) of <b>9aH<sub>2</sub></b> .....                                       | 26 |
| <b>Figure S28.</b> | $^{13}\text{C}$ NMR Spectrum (100 MHz, $\text{CDCl}_3$ ) of <b>11aH<sub>2</sub></b> .....                                   | 27 |
| <b>Figure S29.</b> | FT-IR Spectrum (KBr) of <b>11aH<sub>2</sub></b> .....                                                                       | 27 |
| <b>Figure S30.</b> | $^1\text{H}$ NMR Spectrum (100 MHz, $\text{CDCl}_3$ ) of <b>12aH<sub>2</sub></b> .....                                      | 28 |
| <b>Figure S31.</b> | $^{13}\text{C}$ NMR Spectrum (100 MHz, $\text{CDCl}_3$ ) of <b>12aH<sub>2</sub></b> .....                                   | 28 |
| <b>Figure S32.</b> | DEPT Spectrum (100 MHz, $\text{CDCl}_3$ ) of <b>12aH<sub>2</sub></b> .....                                                  | 29 |
| <b>Figure S33.</b> | FT-IR Spectrum (KBr) of <b>12aH<sub>2</sub></b> .....                                                                       | 29 |
| <b>Figure S34.</b> | $^1\text{H}$ NMR Spectrum (100 MHz, $\text{CDCl}_3$ ) of <b>12aZn</b> .....                                                 | 30 |
| <b>Figure S35.</b> | $^1\text{H}$ NMR Spectrum (100 MHz, $\text{CDCl}_3$ ) of <b>13a-OMe</b> .....                                               | 31 |
| <b>Figure S36.</b> | $^{13}\text{C}$ NMR Spectrum (100 MHz, $\text{CDCl}_3$ ) of <b>13a-OMe</b> .....                                            | 32 |
| <b>Figure S37.</b> | $^1\text{H}$ NMR spectrum (300 MHz, $\text{CDCl}_3$ ) of <b>13a-O<sup>i</sup>Pr</b> .....                                   | 33 |
| <b>Figure S38.</b> | $^1\text{H}$ NMR spectrum (300 MHz, $\text{CDCl}_3$ ) of <b>13a-O<sup>c</sup>Hex</b> .....                                  | 34 |
| <b>Figure S40.</b> | $^1\text{H}$ NMR spectrum (300 MHz, $\text{CDCl}_3$ ) of <b>13a-O<sup>t</sup>Bu</b> .....                                   | 35 |
| <b>Figure S41.</b> | $^{13}\text{C}$ NMR spectrum (100 MHz, $\text{CDCl}_3$ ) of <b>13a-O<sup>t</sup>Bu</b> .....                                | 35 |
| <b>Figure S42.</b> | $^1\text{H}$ NMR spectrum (300 MHz, $\text{CDCl}_3$ ) of <b>13a-O<sup>n</sup>Oct</b> .....                                  | 36 |
| <b>Figure S43.</b> | $^{13}\text{C}$ NMR spectrum (100 MHz, $\text{CDCl}_3$ ) of <b>13a-O<sup>n</sup>Oct</b> .....                               | 36 |
| <b>Figure S44.</b> | $^1\text{H}$ NMR spectrum (400 MHz, $\text{CDCl}_3$ ) of <b>13a-OChol</b> .....                                             | 37 |
| <b>Figure S45.</b> | $^{13}\text{C}$ NMR spectrum (100 MHz, $\text{CDCl}_3$ ) of <b>13a-OChol</b> .....                                          | 37 |
| <b>Figure S46.</b> | FT-IR spectrum (neat, diffuse reflectance) of <b>13a-OChol</b> .....                                                        | 38 |
| <b>Figure S47.</b> | $^1\text{H}$ NMR spectrum (400 MHz, $\text{CDCl}_3$ ) of <b>13a-OPreg</b> .....                                             | 38 |
| <b>Figure S48.</b> | $^{13}\text{C}$ NMR spectrum (100 MHz, $\text{CDCl}_3$ ) of <b>13a-OPreg</b> .....                                          | 39 |
| <b>Figure S50.</b> | $^1\text{H}$ NMR spectrum (300 MHz, $\text{CDCl}_3$ ) of <b>13a-N<sup>morph</sup></b> .....                                 | 40 |
| <b>Figure S51.</b> | $^{13}\text{C}$ NMR spectrum (100 MHz, $\text{CDCl}_3$ ) of <b>13a-N<sup>morph</sup></b> .....                              | 40 |
| <b>Figure S52.</b> | $^1\text{H}$ NMR spectrum (300 MHz, $\text{CDCl}_3$ ) of <b>13a-N(Bn)<sub>2</sub></b> .....                                 | 41 |
| <b>Figure S53.</b> | $^1\text{H}$ NMR spectrum (300 MHz, $\text{CDCl}_3$ ) of <b>13a-SEt</b> .....                                               | 42 |
| <b>Figure S54.</b> | $^{13}\text{C}$ NMR spectrum (100 MHz, $\text{CDCl}_3$ ) of <b>13a-SEt</b> .....                                            | 42 |
| <b>Figure S55.</b> | $^1\text{H}$ NMR spectrum (300 MHz, $\text{CDCl}_3$ ) of <b>13a-S<sup>n</sup>Hex</b> .....                                  | 43 |
| <b>Figure S56.</b> | UV-visible spectra of porpholactones <b>5aH<sub>2</sub></b> and <b>15-II-H<sub>2</sub></b> .....                            | 44 |
| <b>Figure S57.</b> | $^1\text{H}$ NMR (400 MHz, $\text{CDCl}_3$ ) of a mixture of <b>15-I-H<sub>2</sub></b> and <b>15-II-H<sub>2</sub></b> ..... | 44 |

|                                                                                                                                                                                                              |    |
|--------------------------------------------------------------------------------------------------------------------------------------------------------------------------------------------------------------|----|
| <b>Figure S58.</b> $^1\text{H}$ NMR (300 MHz, $\text{CDCl}_3$ ) of <b>15-II-H<sub>2</sub></b> .....                                                                                                          | 45 |
| <b>Figure S59.</b> NOESY Spectrum (300 MHz, $\text{CDCl}_3$ ) of <b>15-II-H<sub>2</sub></b> .....                                                                                                            | 45 |
| <b>Figure S60.</b> $^{13}\text{C}$ NMR (100 MHz, $\text{CDCl}_3$ ) of <b>15-II-H<sub>2</sub></b> .....                                                                                                       | 46 |
| <b>Figure S61.</b> FT-IR spectrum (neat, diffuse reflectance) of <b>15-II-H<sub>2</sub></b> .....                                                                                                            | 46 |
| <b>Figure S62.</b> $^1\text{H}$ NMR (300 MHz, $\text{CDCl}_3$ ) of <b>15-II-Zn</b> .....                                                                                                                     | 47 |
| <b>Figure S63.</b> FT-IR spectrum (neat, diffuse reflectance) of <b>15-II-Zn</b> .....                                                                                                                       | 47 |
| <b>DETAILS OF THE SINGLE CRYSTAL X-RAY DIFFRACTOMETRY STUDIES</b> .....                                                                                                                                      | 48 |
| <b>Table S1.</b> Crystallographic data and structure refinement for <b>5aH<sub>2</sub></b> .....                                                                                                             | 48 |
| <b>Figure S64.</b> ORTEP representation of <b>5aH<sub>2</sub></b> .....                                                                                                                                      | 50 |
| <b>Table S2.</b> Crystallographic data and structure refinement for <b>5aZn</b> .....                                                                                                                        | 51 |
| <b>Figure S65.</b> ORTEP representation of <b>5aZn·py</b> .....                                                                                                                                              | 52 |
| <b>Table S3.</b> Crystallographic data and structure refinement for <b>12aH<sub>2</sub></b> .....                                                                                                            | 53 |
| <b>Figure S66.</b> ORTEP representation of <b>12aH<sub>2</sub></b> .....                                                                                                                                     | 54 |
| <b>Table S4.</b> Crystallographic data for <b>15-II-Zn·py</b> .....                                                                                                                                          | 55 |
| <b>Figure S67.</b> ORTEP representation of <b>15-II-Zn·py</b> .....                                                                                                                                          | 57 |
| <b>Table S5.</b> Crystallographic data for <b>13a-OMe</b> .....                                                                                                                                              | 58 |
| <b>Figure S68.</b> ORTEP representation of <b>13a-OMe</b> .....                                                                                                                                              | 59 |
| <b>Figure S69.</b> ORTEP representation of <b>13a-OMe</b> .....                                                                                                                                              | 59 |
| <b>DETAILS TO THE COMPUTATIONS</b> .....                                                                                                                                                                     | 60 |
| <b>Table S6.</b> Ratios of the oscillator strength of the $Q_x$ band divided by the oscillator strength of the Soret band as a function of solvent and comparison to computed ratios. ....                   | 60 |
| <b>Figure S71.</b> Ground and excited state charge behavior in <b>12aH<sub>2</sub></b> based on SAC-CI molecular orbital theory using a full double-zeta D95 basis set and level two integral selection..... | 62 |
| <b>Figure S72.</b> Charge shifts upon excitation into the lowest-lying $Q_x$ state of <b>12aH<sub>2</sub></b> based on MNDO-PSDCI molecular orbital theory.....                                              | 63 |
| <b>COMPUTATIONS: TABLES OF ATOM COORDINATES AND ABSOLUTE ENERGIES</b> .....                                                                                                                                  | 64 |
| <b>Table S7.</b> Ground State Coordinates of porphyrin <b>1aH<sub>2</sub></b> w/o Ph.....                                                                                                                    | 64 |
| <b>Table S8.</b> Ground State Coordinates of chlorin .....                                                                                                                                                   | 65 |
| <b>Table S9.</b> Ground State Coordinates of chlorin <b>5aH<sub>2</sub></b> w/o Ph.....                                                                                                                      | 66 |
| <b>Table S10.</b> Ground State Coordinates of chlorin <b>7aH<sub>2</sub></b> w/o Ph.....                                                                                                                     | 67 |
| <b>Table S11.</b> Ground State Coordinates of chlorin <b>10aH<sub>2</sub></b> w/o Ph.....                                                                                                                    | 68 |
| <b>Table S12.</b> Ground State Coordinates of chlorin <b>12aH<sub>2</sub></b> w/o Ph.....                                                                                                                    | 69 |
| <b>Table S13.</b> Ground State Coordinates of <b>TPP</b> .....                                                                                                                                               | 70 |
| <b>Table S14.</b> Ground State Coordinates of <b>TPP 1aH<sub>2</sub></b> .....                                                                                                                               | 72 |
| <b>Table S15.</b> Ground State Coordinates of <b>TPC</b> .....                                                                                                                                               | 74 |
| <b>Table S16.</b> Ground State Coordinates of <b>5aH<sub>2</sub></b> .....                                                                                                                                   | 76 |
| <b>Table S17.</b> Ground State Coordinates of <b>7aH<sub>2</sub></b> .....                                                                                                                                   | 78 |
| <b>Table S18.</b> Ground State Coordinates of <b>10aH<sub>2</sub></b> .....                                                                                                                                  | 80 |
| <b>Table S19.</b> Ground State Coordinates of <b>12aH<sub>2</sub></b> .....                                                                                                                                  | 82 |

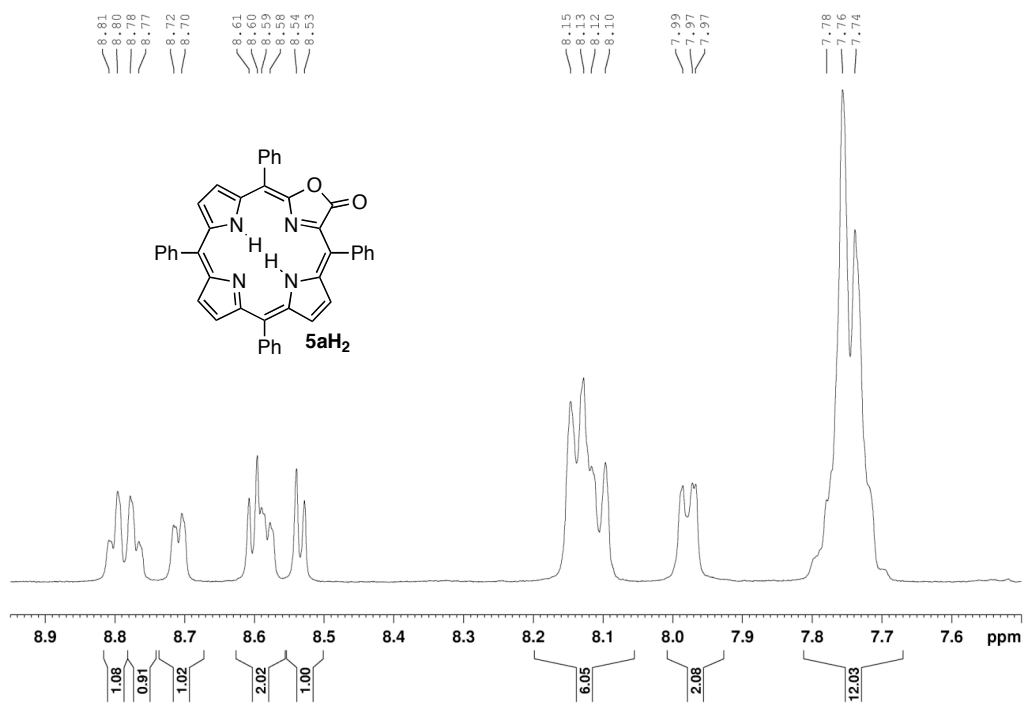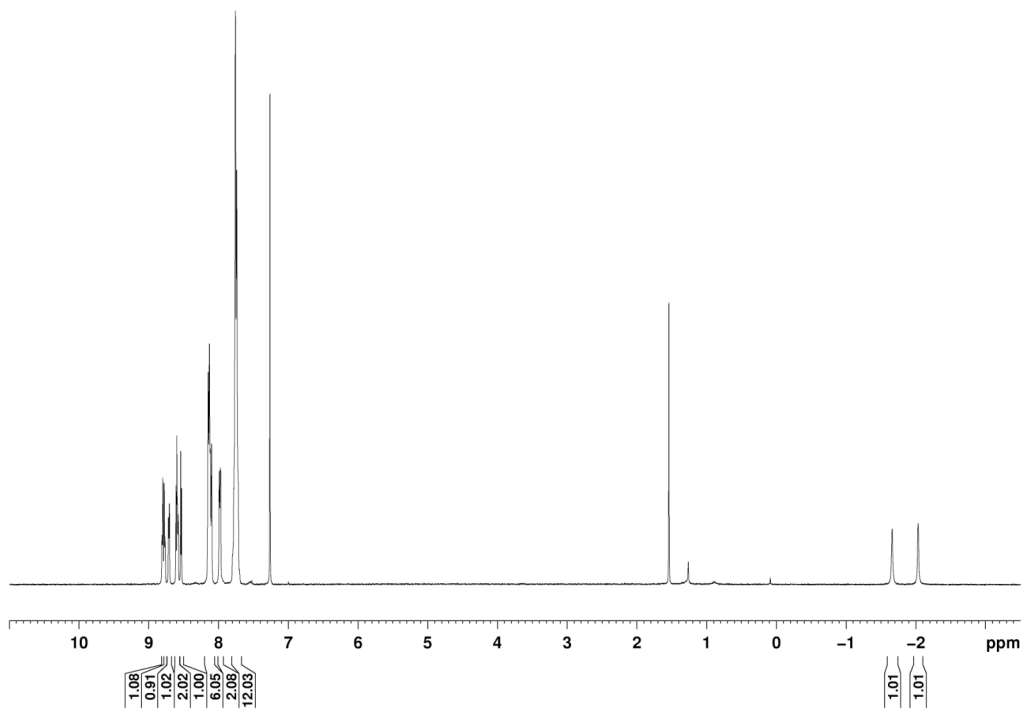

**Figure S1.** <sup>1</sup>H NMR Spectrum (400 MHz, CDCl<sub>3</sub>) of **5aH<sub>2</sub>**

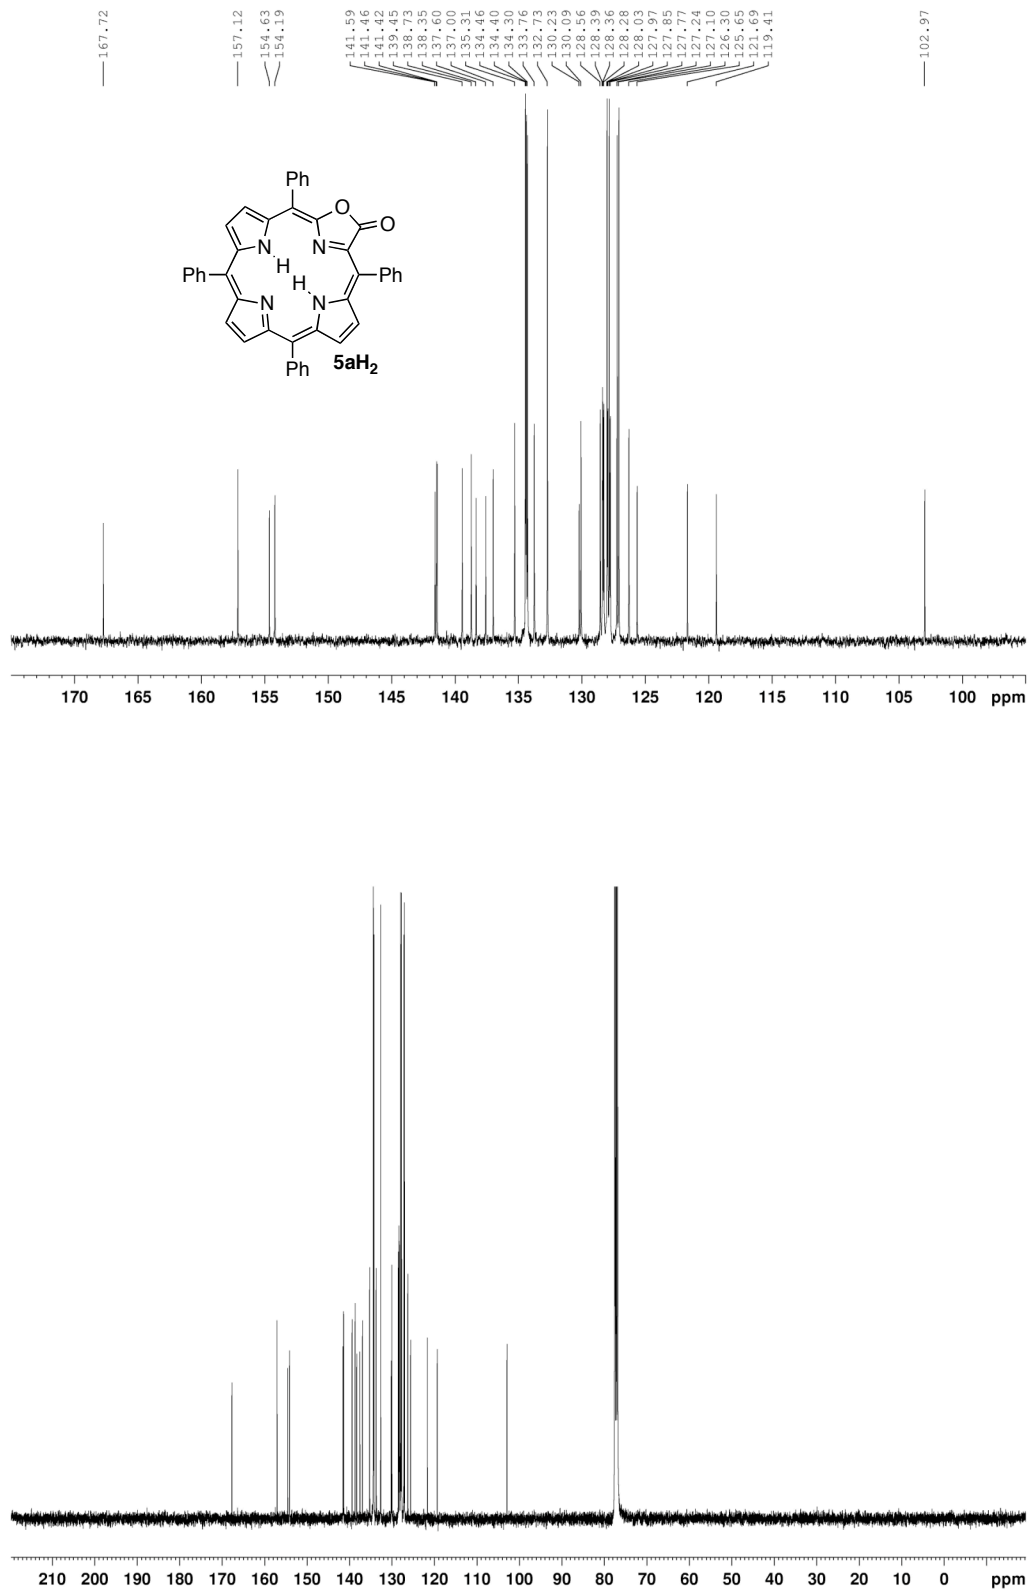

**Figure S2.** <sup>13</sup>C NMR Spectrum (100 MHz, CDCl<sub>3</sub>) of **5aH<sub>2</sub>**

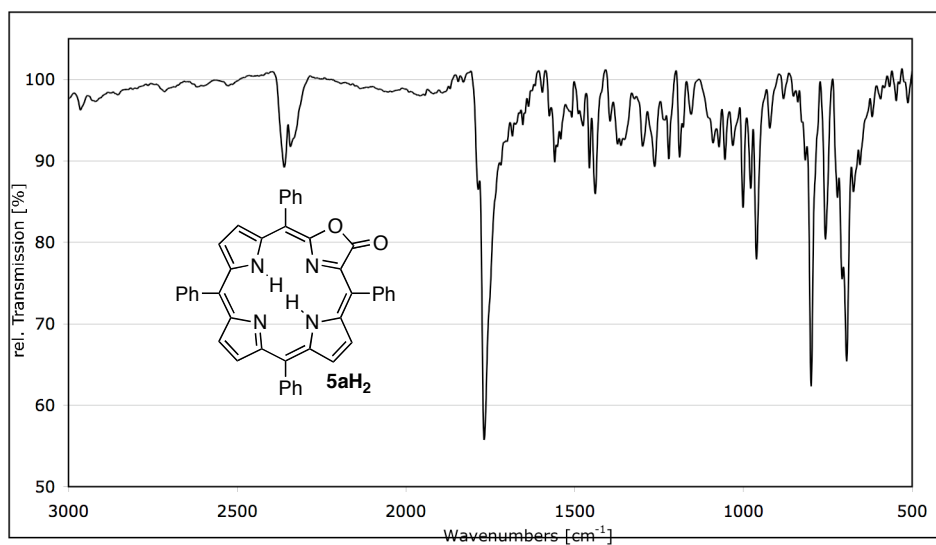

**Figure S3.** FT-IR Spectrum (KBr) of **5aH<sub>2</sub>**

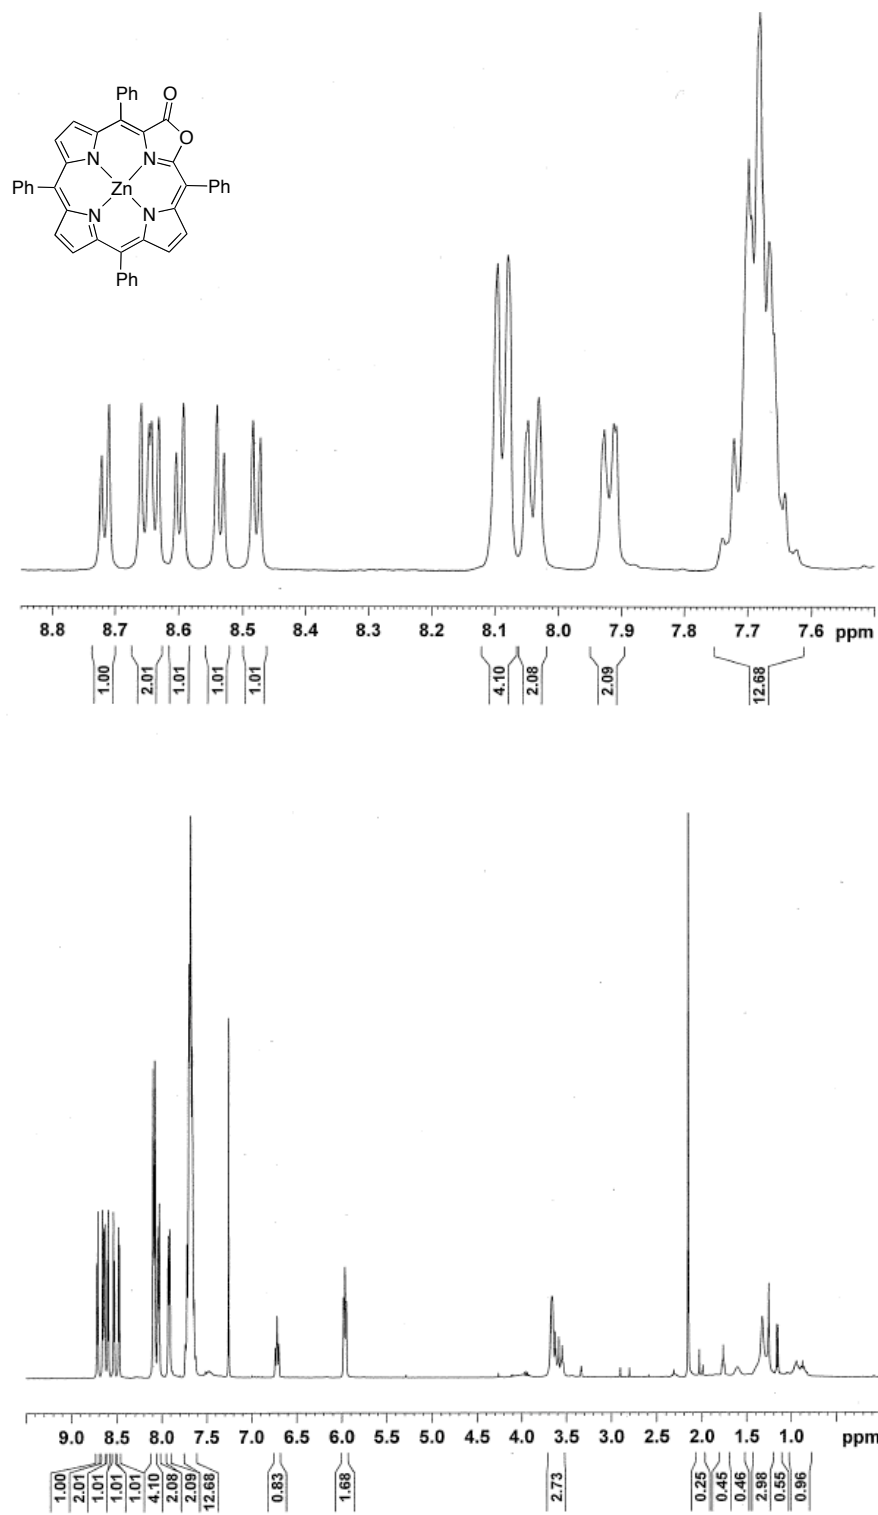

Figure S4.  $^1\text{H}$  NMR Spectrum (400 MHz,  $\text{CDCl}_3$ ) of **5aZn**

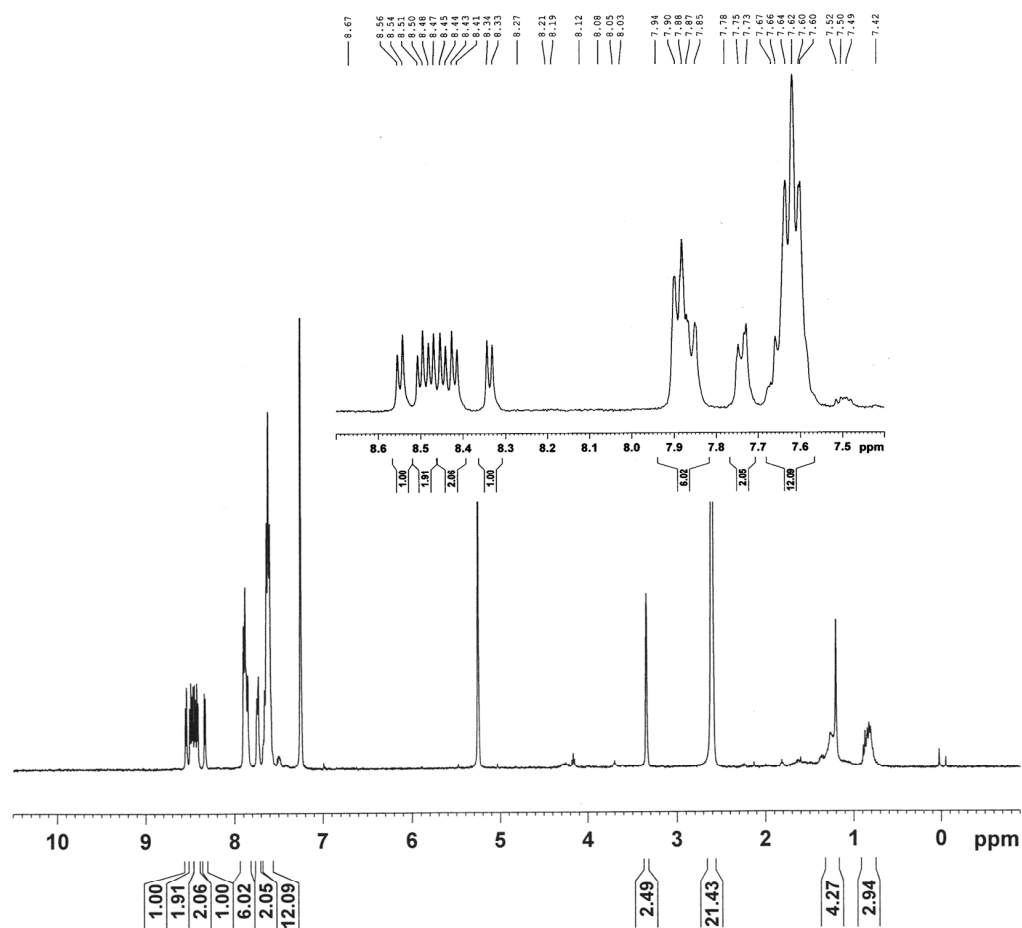

**Figure S5.**  $^1\text{H}$  NMR (400 MHz,  $\text{CDCl}_3 + 10\%$  MeOH- $d_4$ , 25 °C) of **5aNi**. The compound possesses limited solubility.

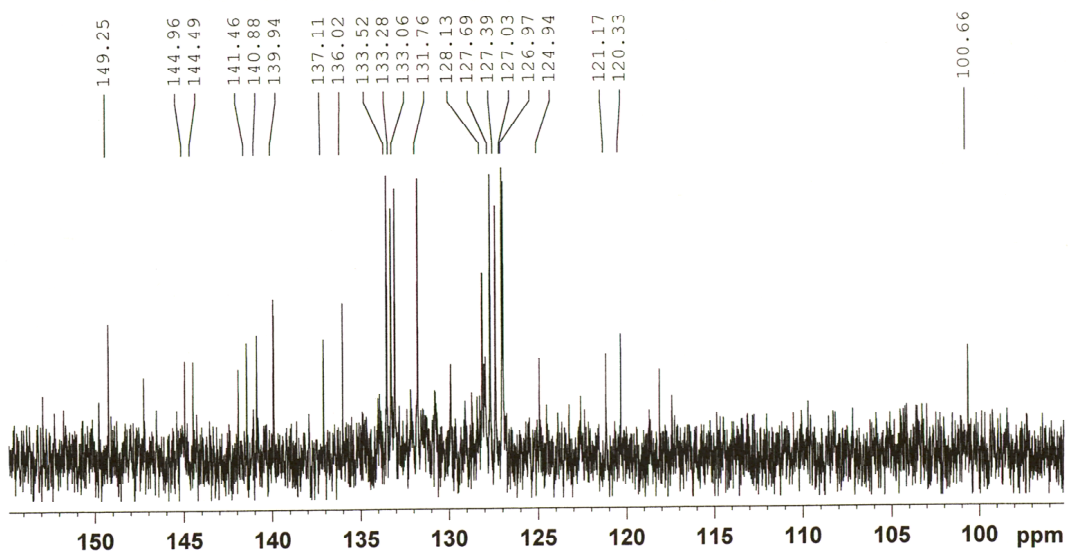

**Figure S6.**  $^{13}\text{C}$  NMR (100 MHz,  $\text{CDCl}_3 + 10\%$  MeOH- $d_4$ , 25 °C, D1 = 3s) of **5aNi**. The compound possesses limited solubility.



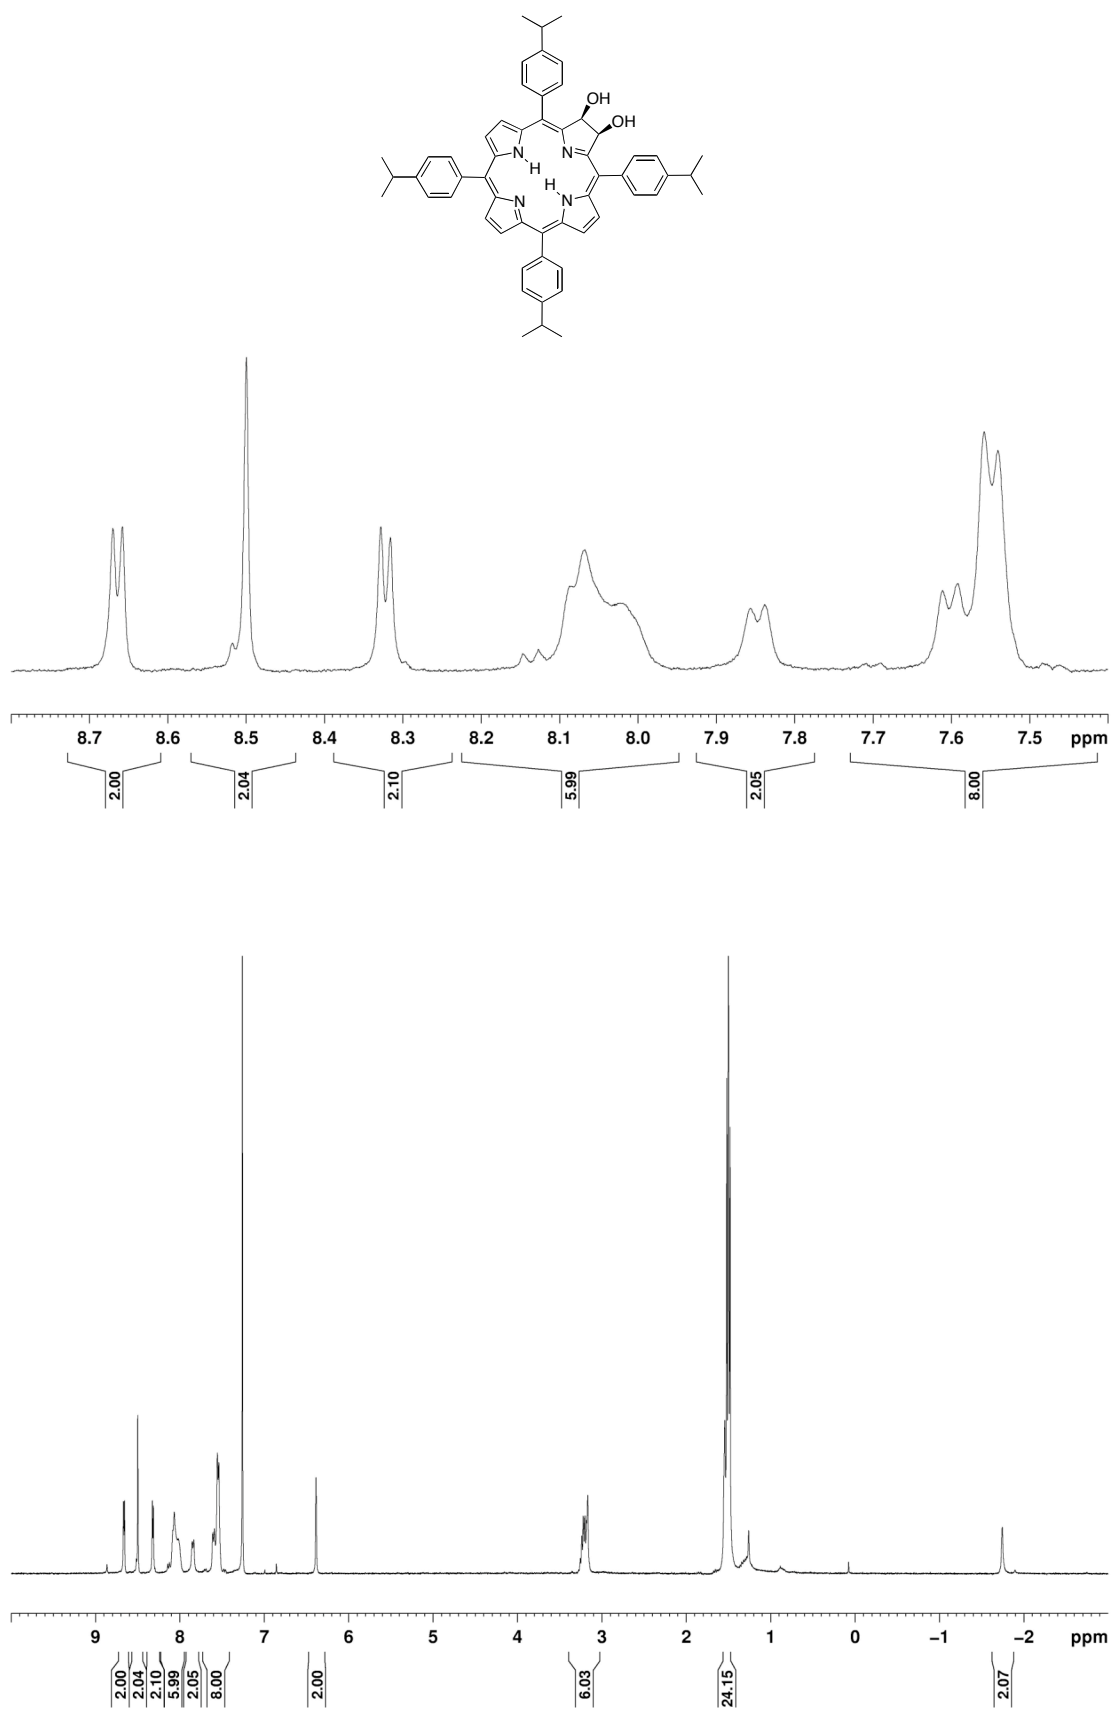

**Figure S7.** <sup>1</sup>H NMR Spectrum (400 MHz, CDCl<sub>3</sub>) of **7bH<sub>2</sub>**

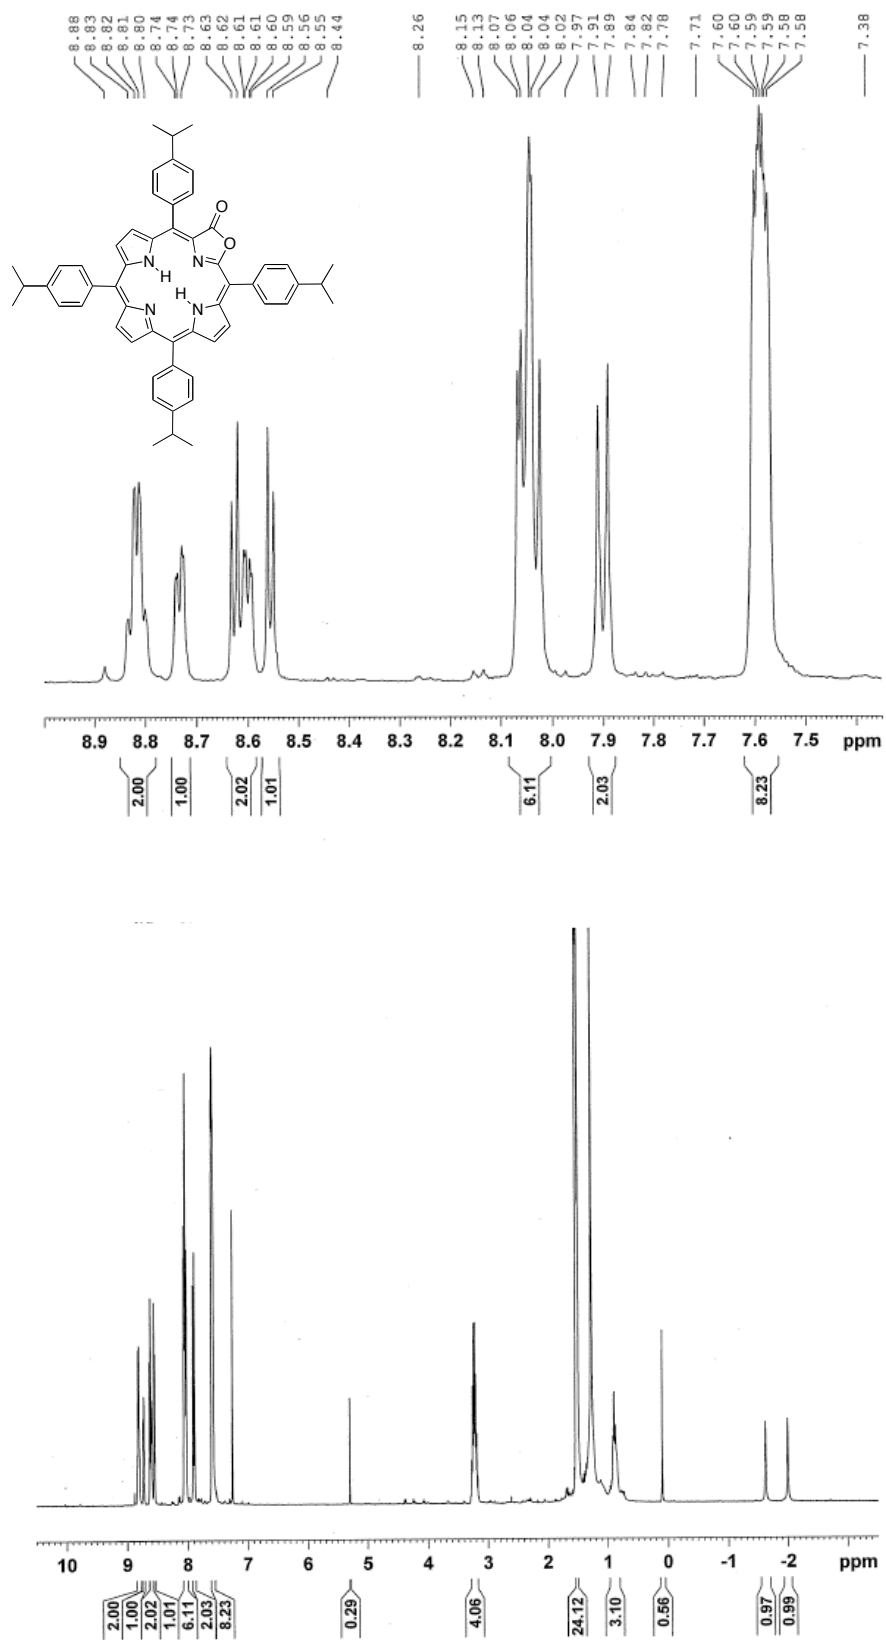

Figure S8. <sup>1</sup>H NMR Spectrum (400 MHz, CDCl<sub>3</sub>) of **5bH<sub>2</sub>**

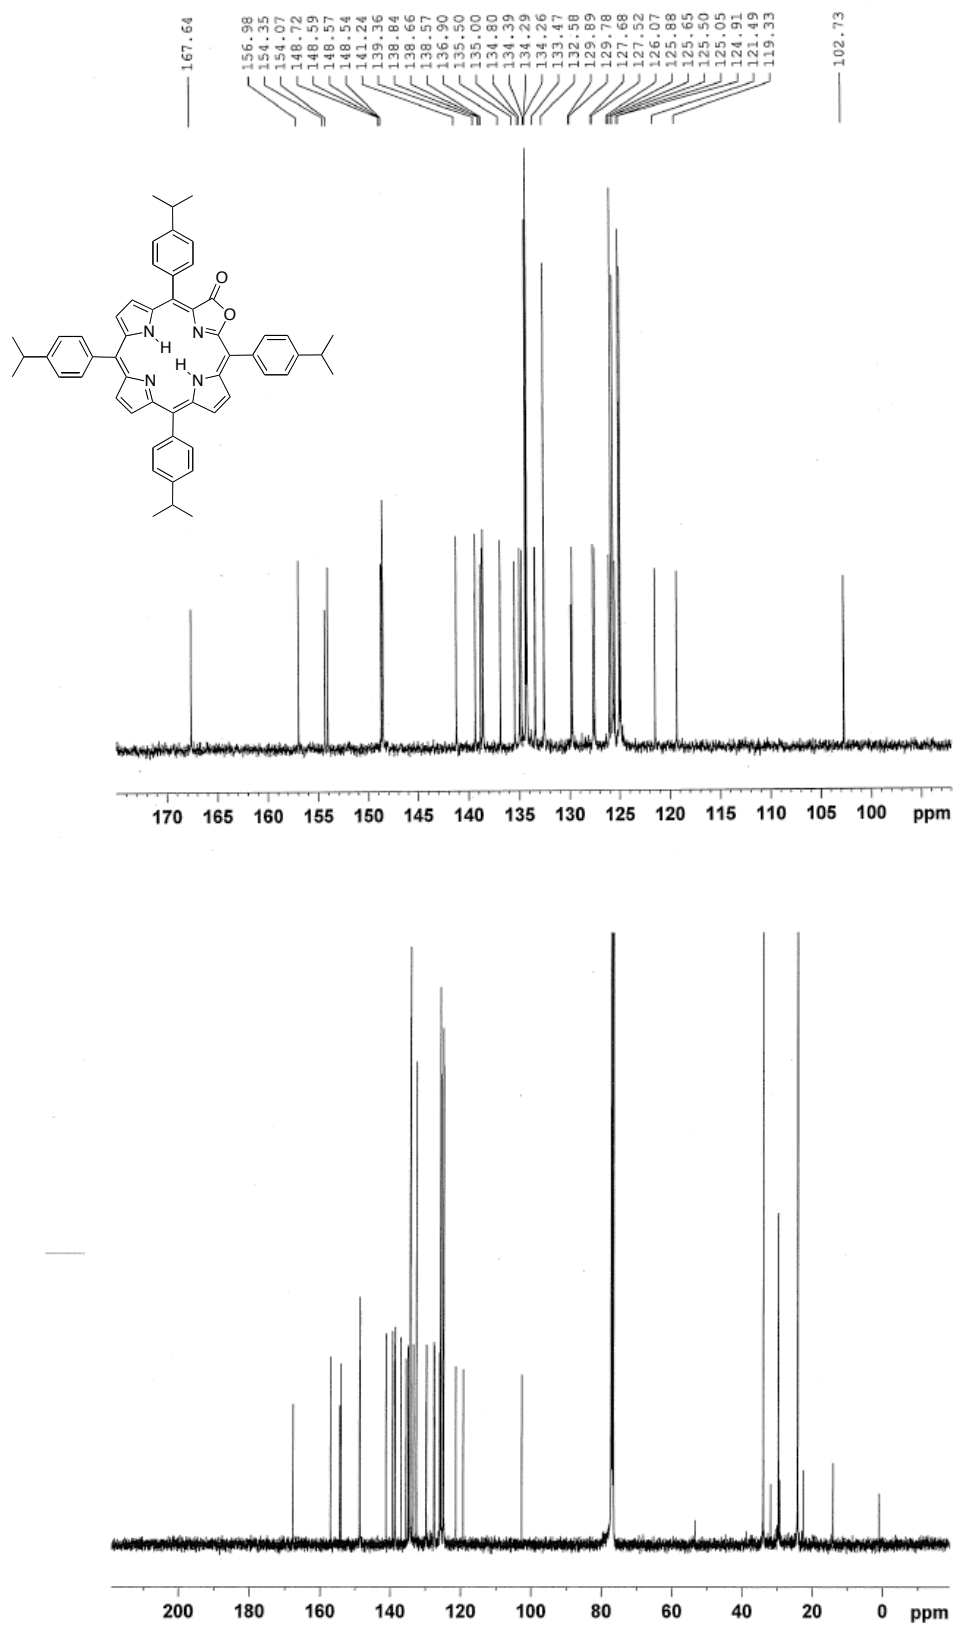

Figure S9. <sup>13</sup>C NMR Spectrum (100 MHz, CDCl<sub>3</sub>, D1 = 3s) of **5bH<sub>2</sub>**

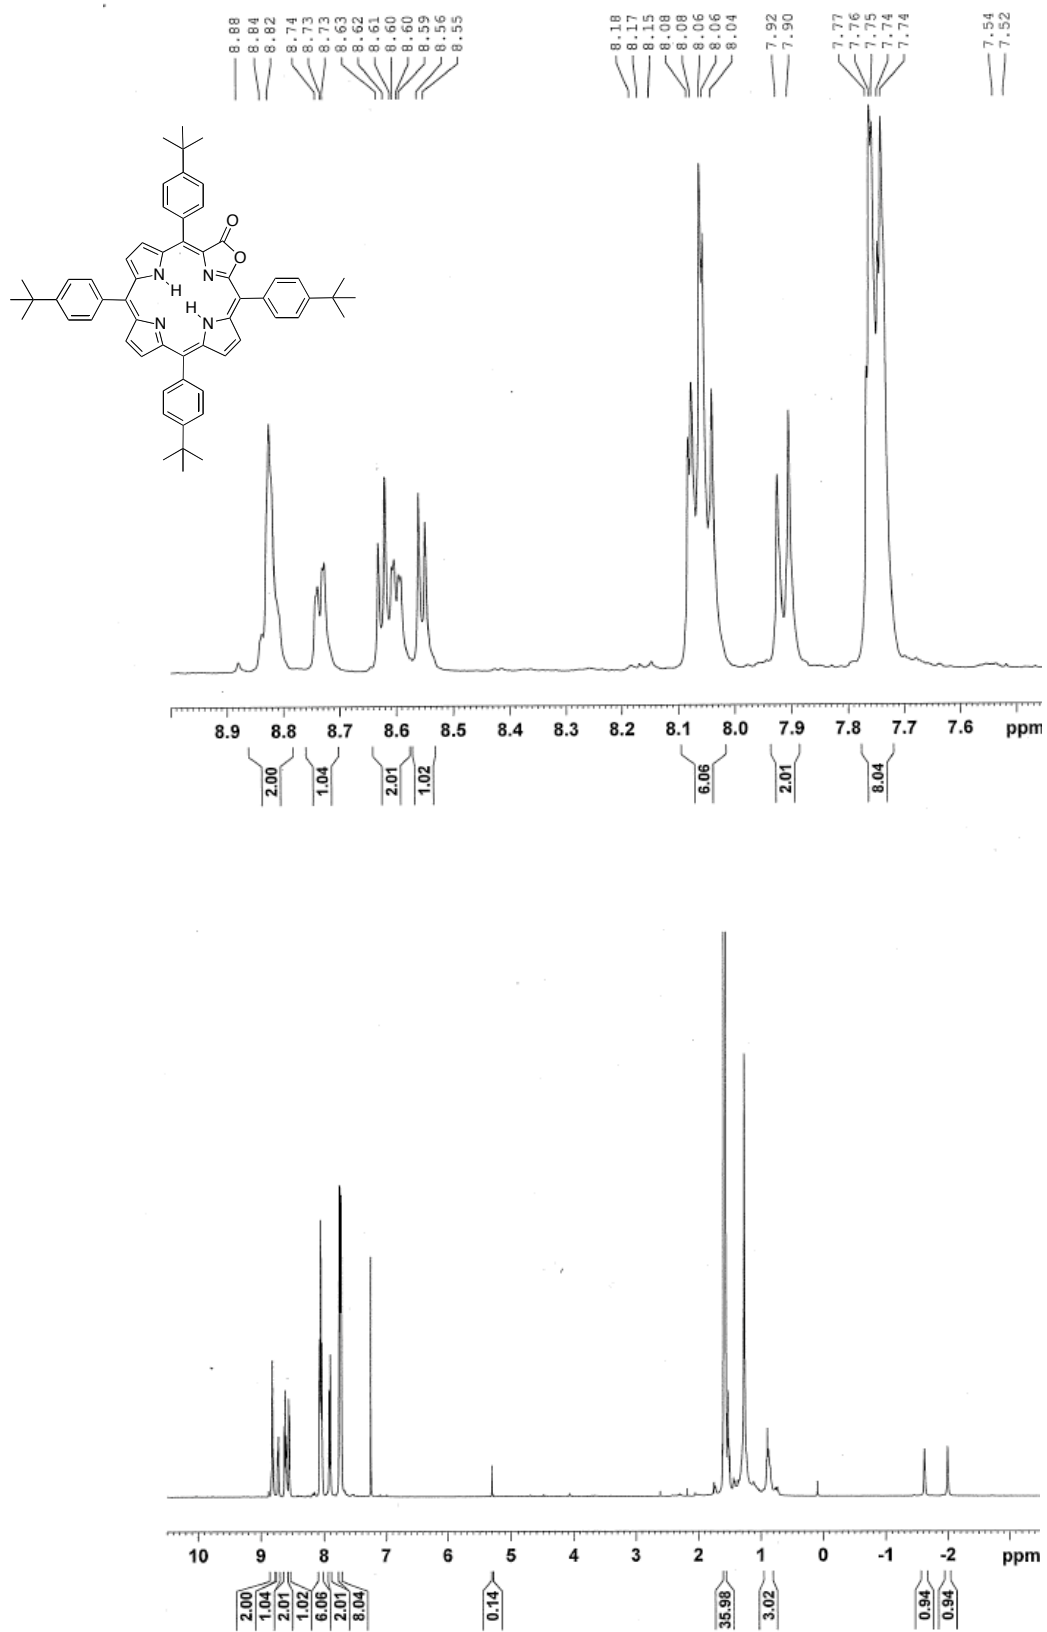

Figure S10. <sup>1</sup>H NMR Spectrum (400 MHz, CDCl<sub>3</sub>) of 5cH<sub>2</sub>

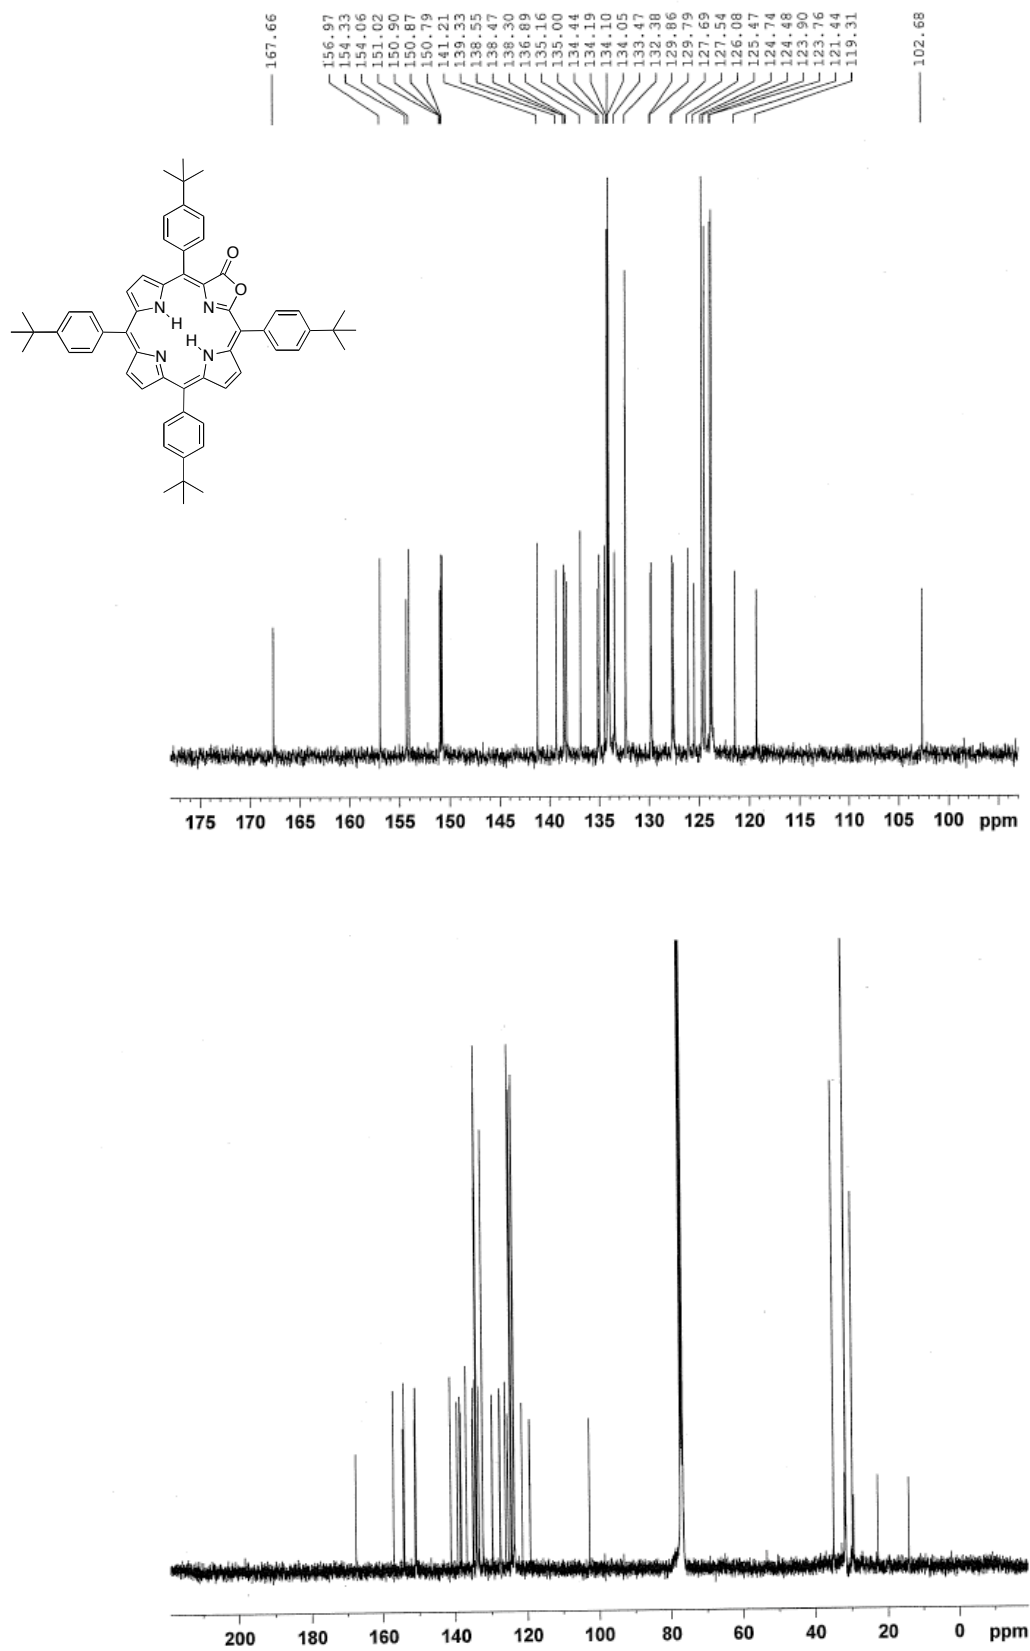

**Figure S11.** <sup>13</sup>C NMR Spectrum (100 MHz, CDCl<sub>3</sub>, D1 = 3s) of **5cH<sub>2</sub>**

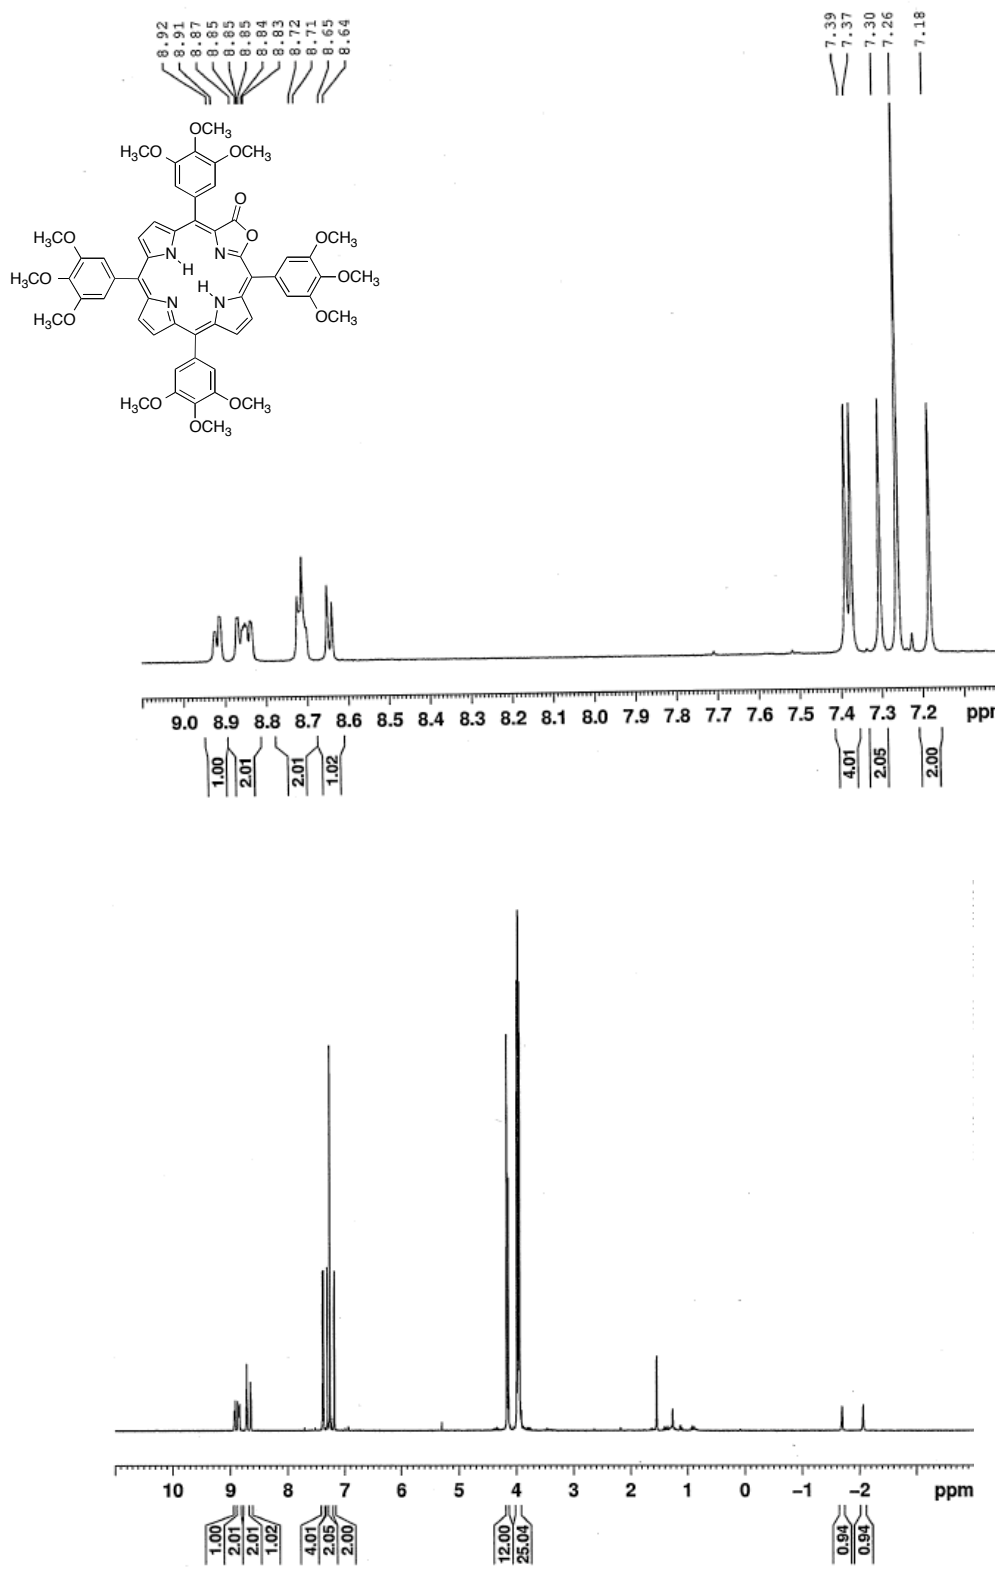

Figure S12.  $^1\text{H}$  NMR Spectrum (400 MHz,  $\text{CDCl}_3$ ) of **5dH<sub>2</sub>**

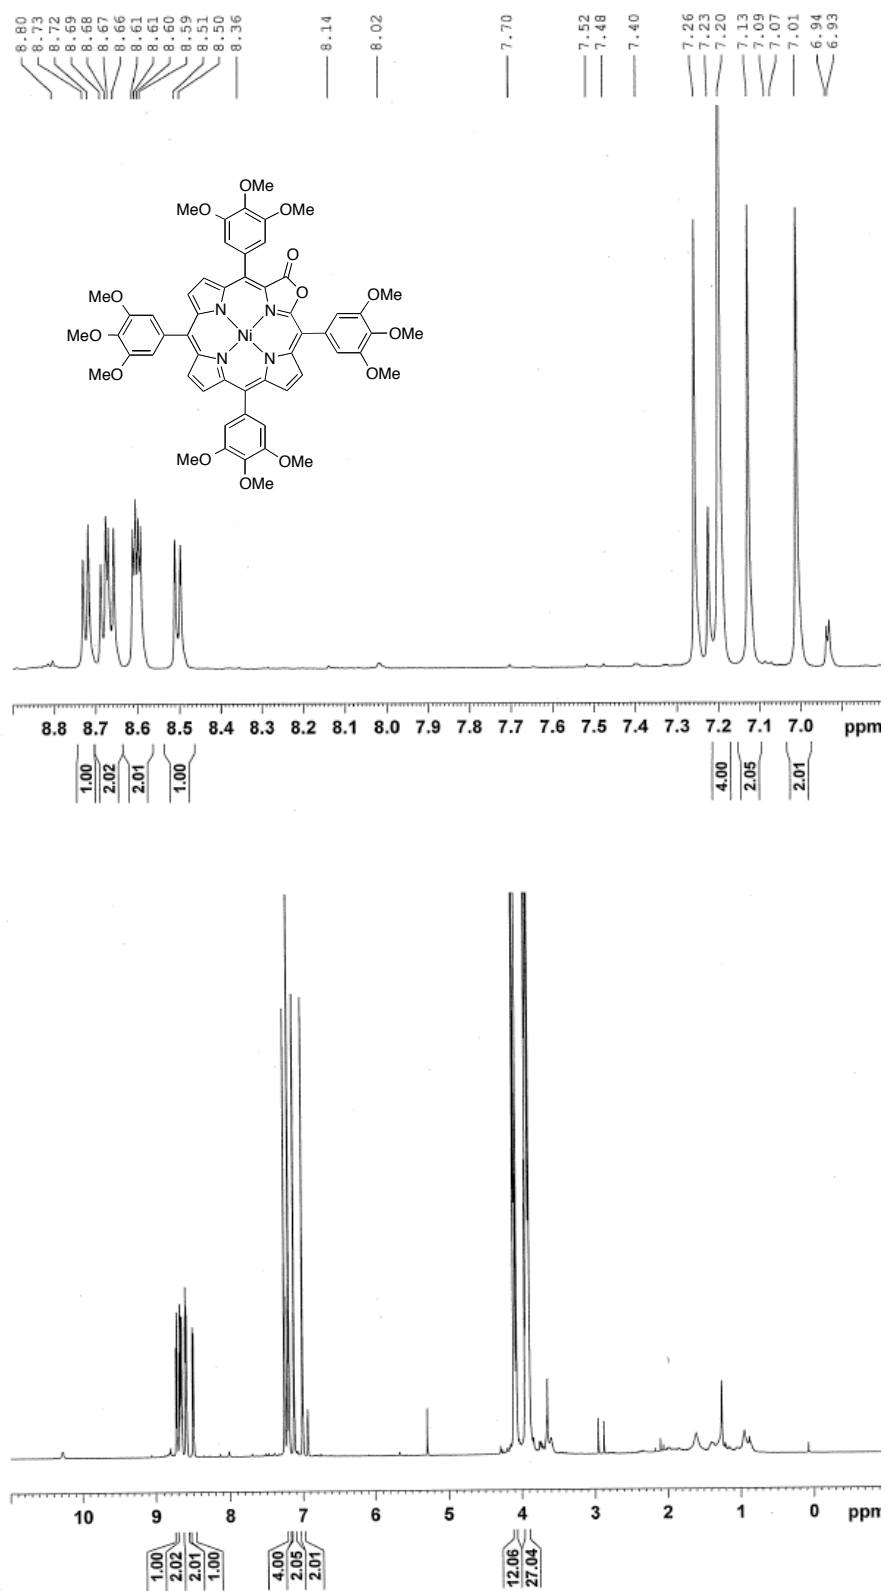

Figure S13.  $^1\text{H}$  NMR (400 MHz,  $\text{CDCl}_3$ ) of 5dNi

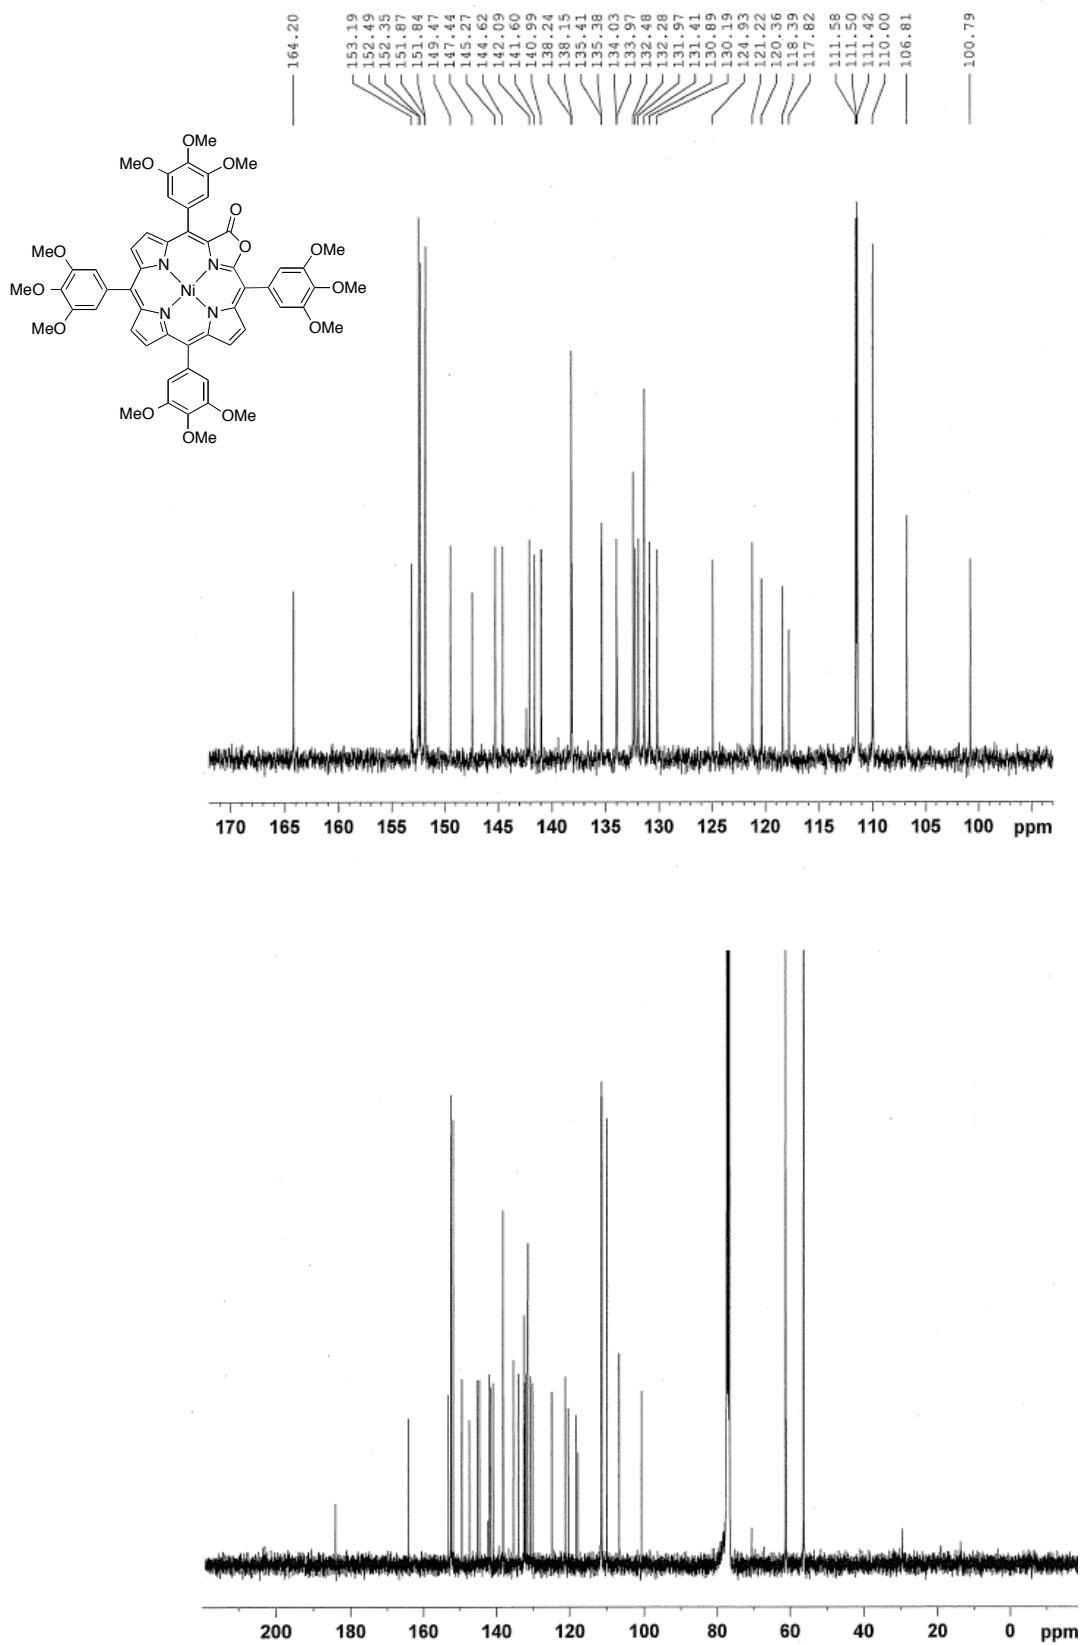

Figure S14. <sup>13</sup>C NMR Spectrum (100 MHz, CDCl<sub>3</sub>, D1 = 3s) of 5dNi



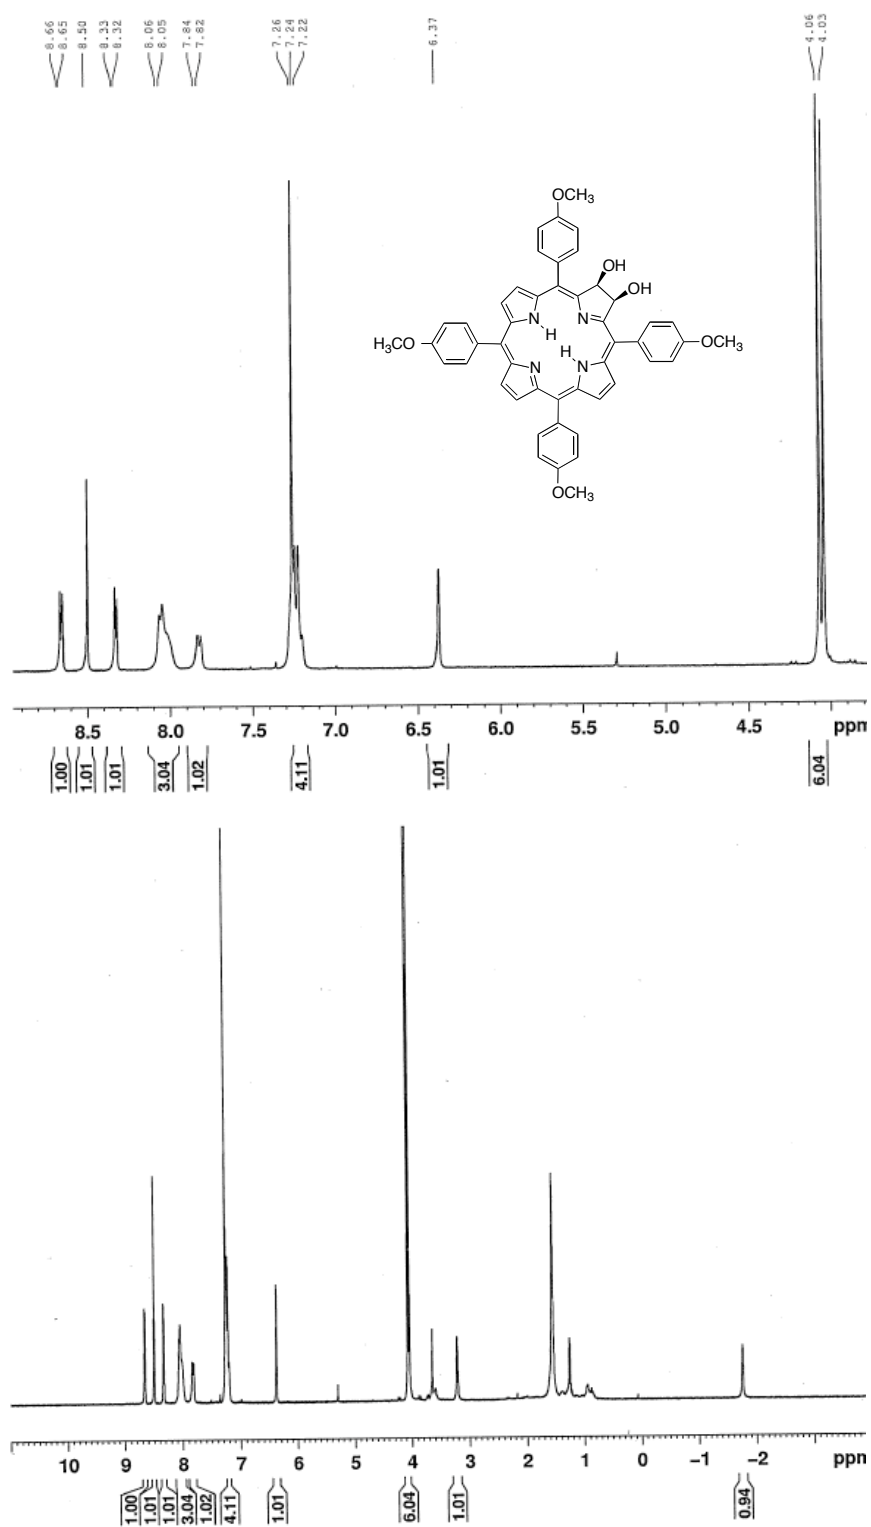

**Figure S15.** <sup>1</sup>H NMR Spectrum (400 MHz, CDCl<sub>3</sub>) of **7eH<sub>2</sub>**

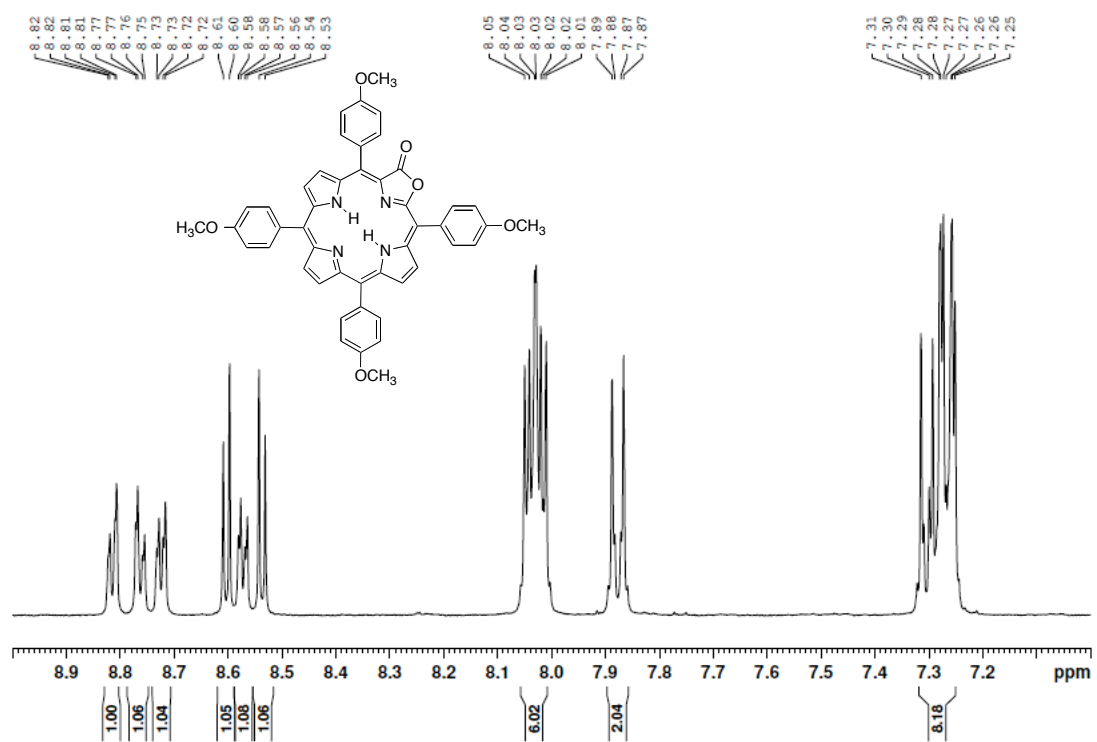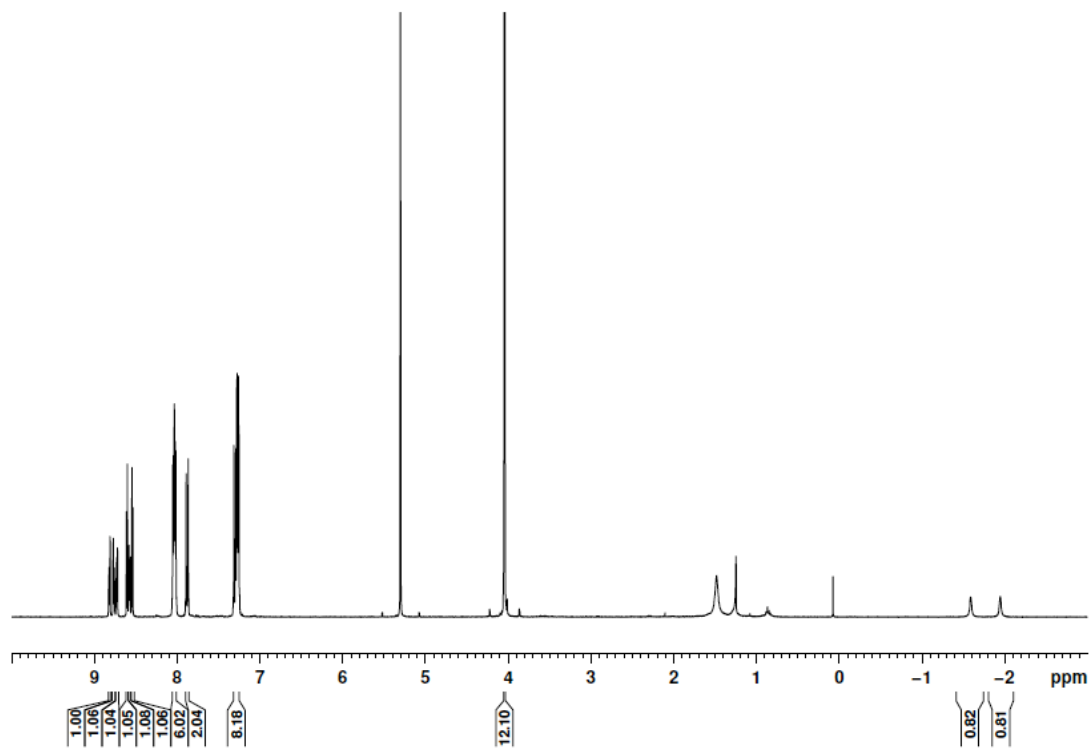

**Figure S16.** <sup>1</sup>H NMR Spectrum (400 MHz, CD<sub>2</sub>Cl<sub>2</sub>) of **5eH<sub>2</sub>**

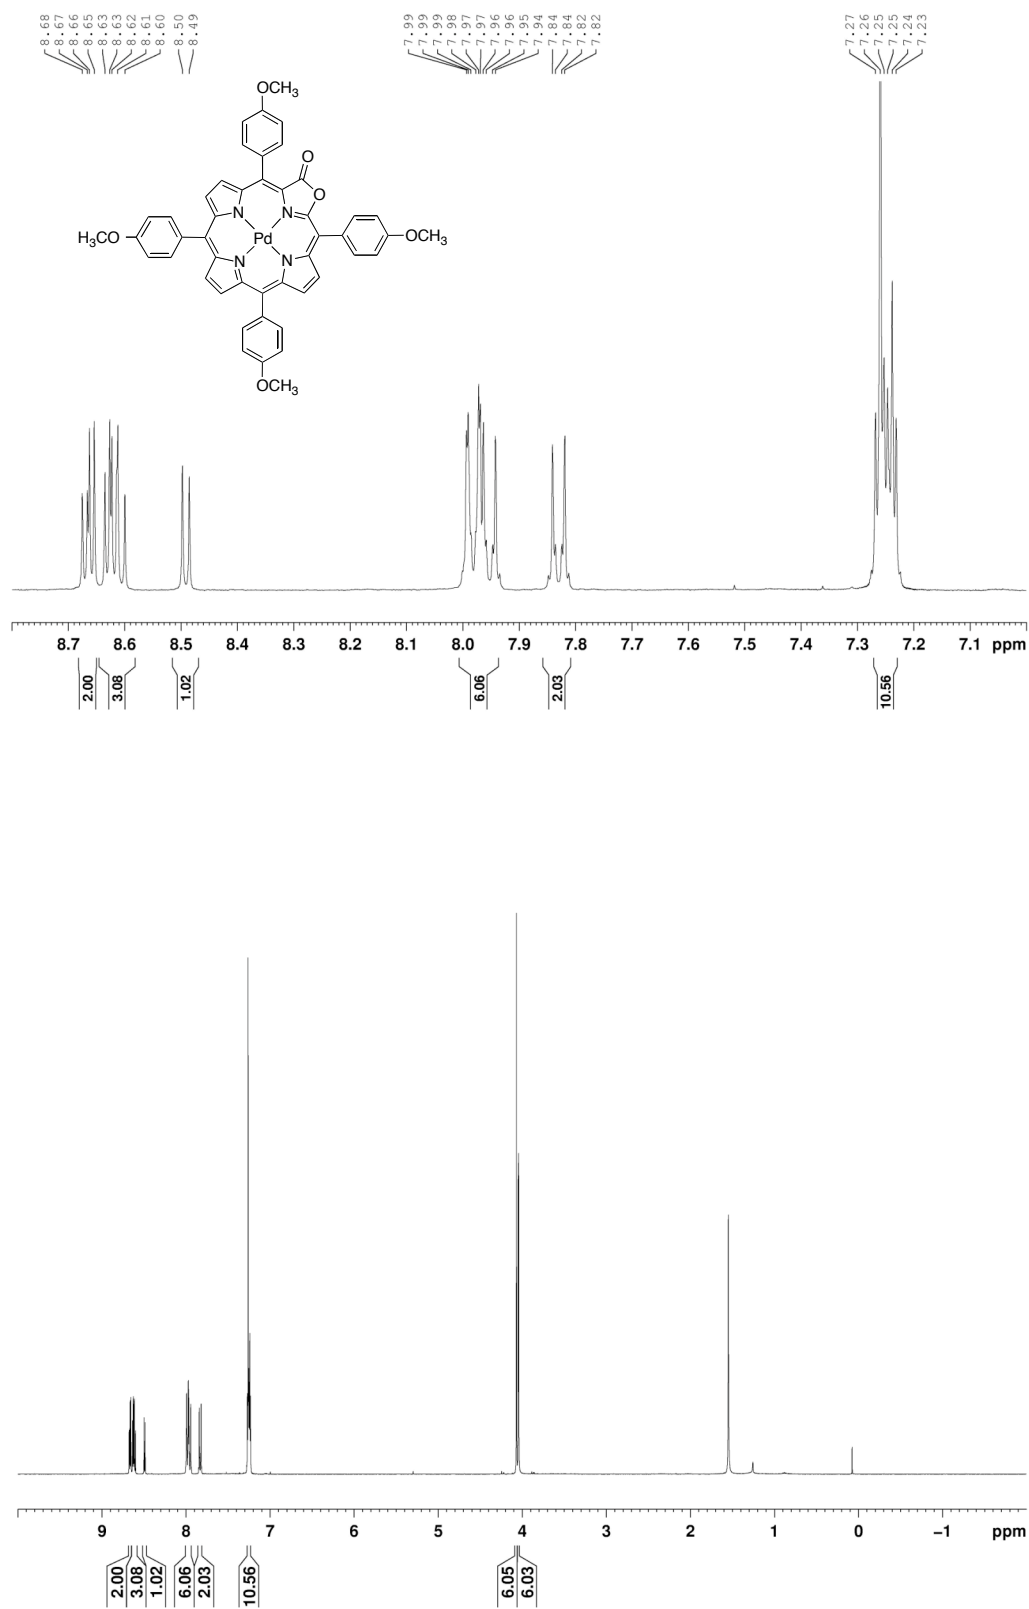

**Figure S17.**  $^1\text{H NMR}$  Spectrum (400 MHz,  $\text{CDCl}_3$ ) of **5ePd**

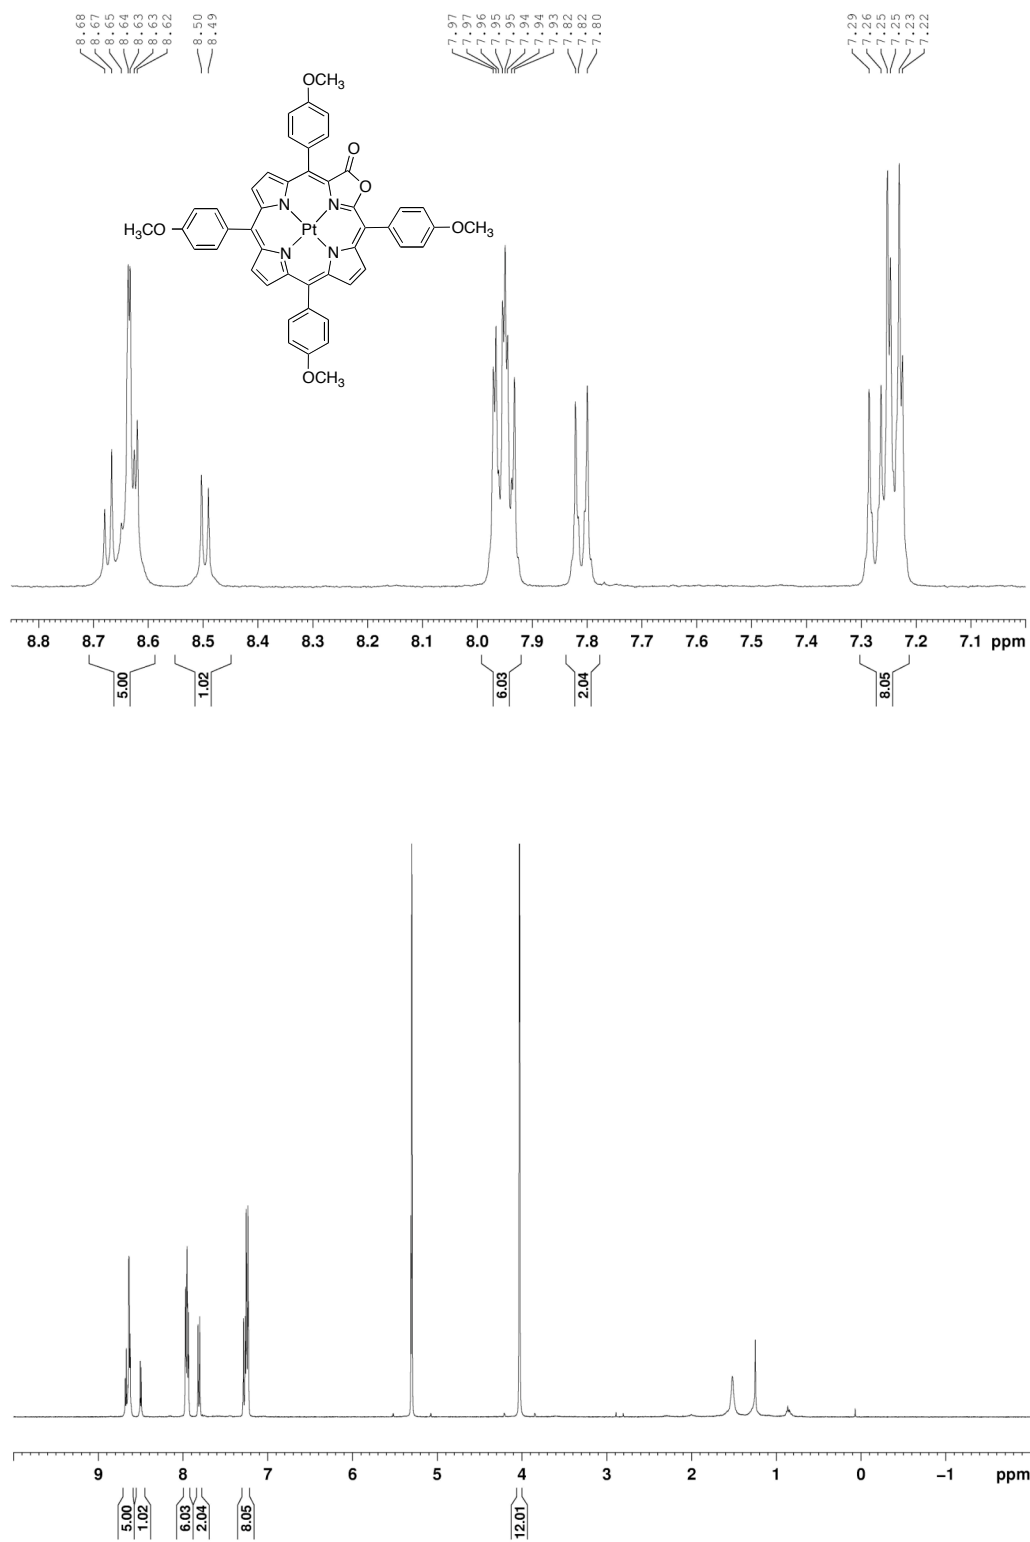

**Figure S18.**  $^1\text{H}$  NMR Spectrum (400 MHz,  $\text{CD}_2\text{Cl}_2$ ) of **5ePt**

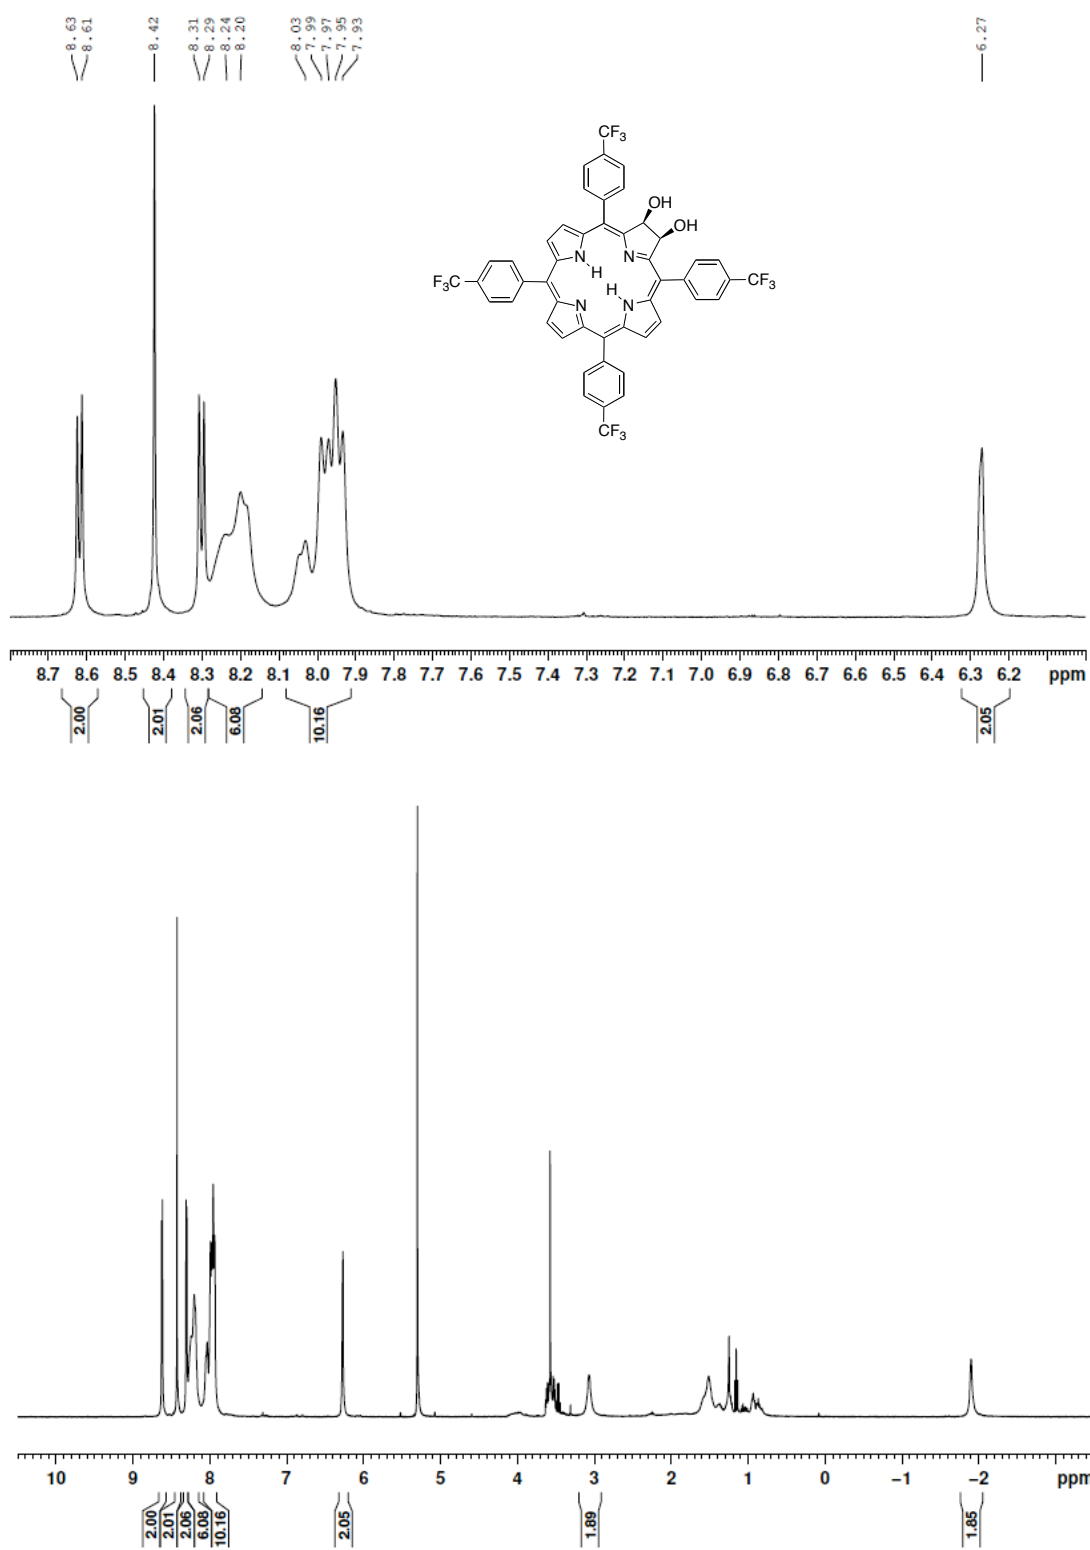

**Figure S19.** <sup>1</sup>H NMR (400 MHz, CD<sub>2</sub>Cl<sub>2</sub>) of **7fH<sub>2</sub>**

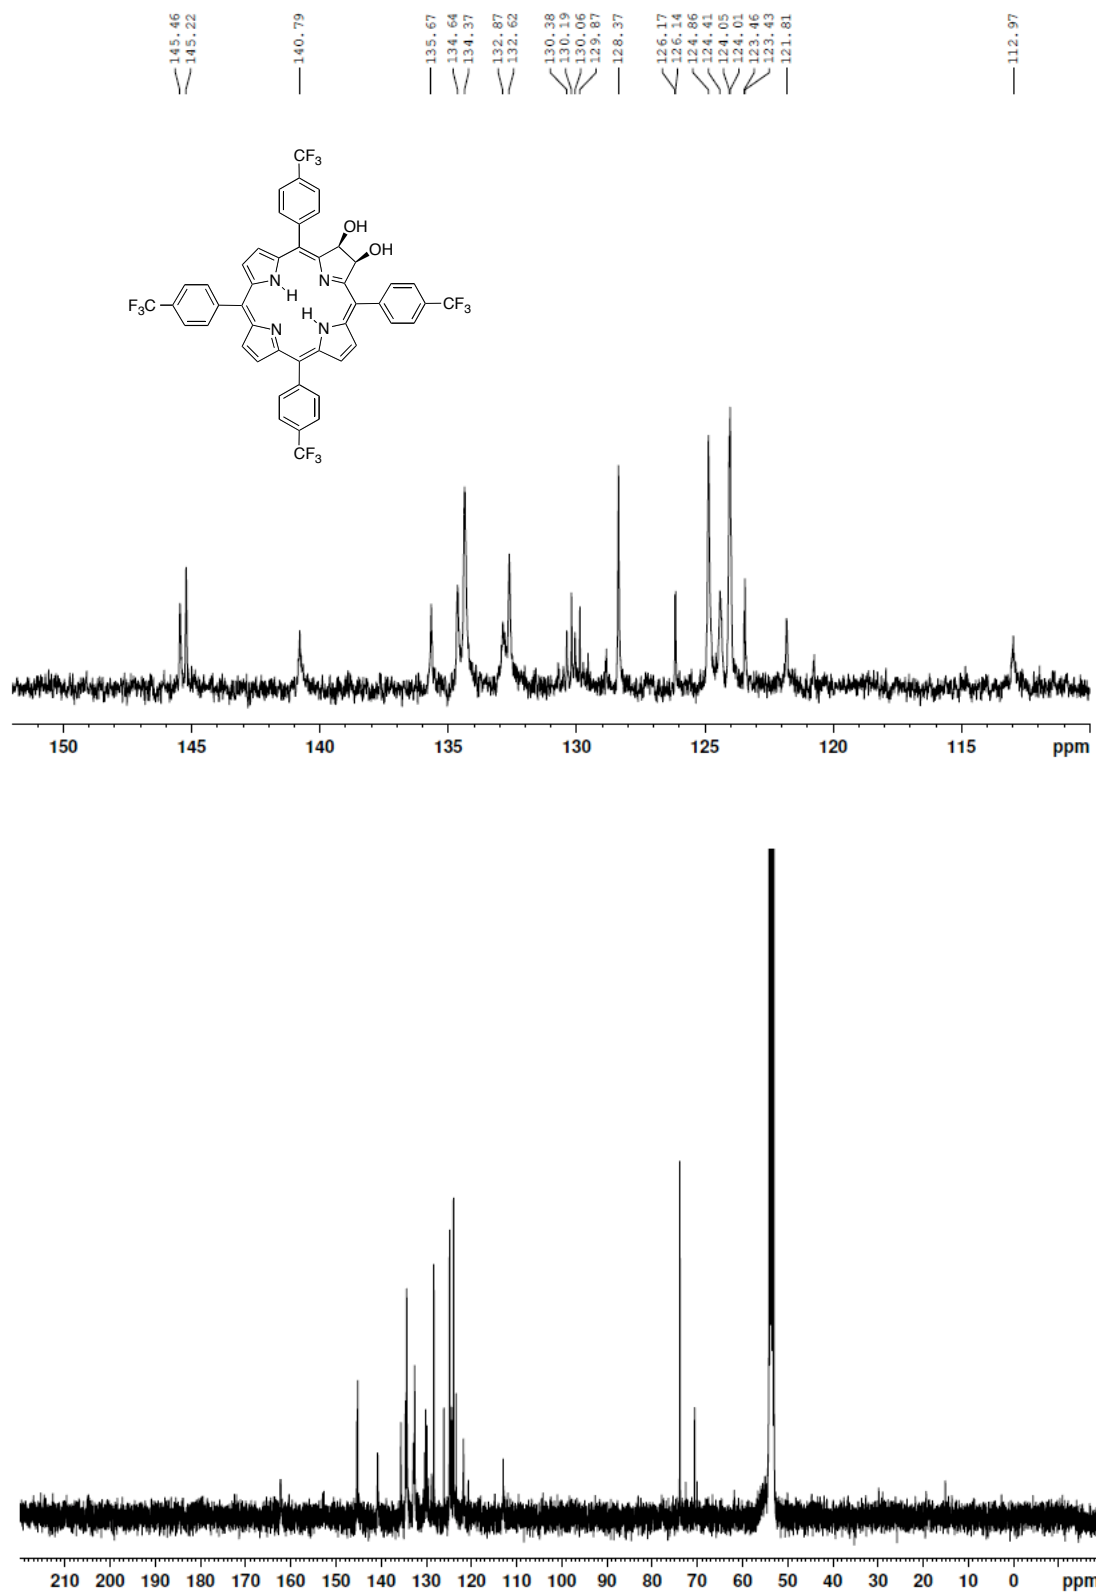

**Figure S20.**  $^{13}\text{C}$  NMR Spectrum (100 MHz,  $\text{CD}_2\text{Cl}_2$ ) of **7fH<sub>2</sub>**

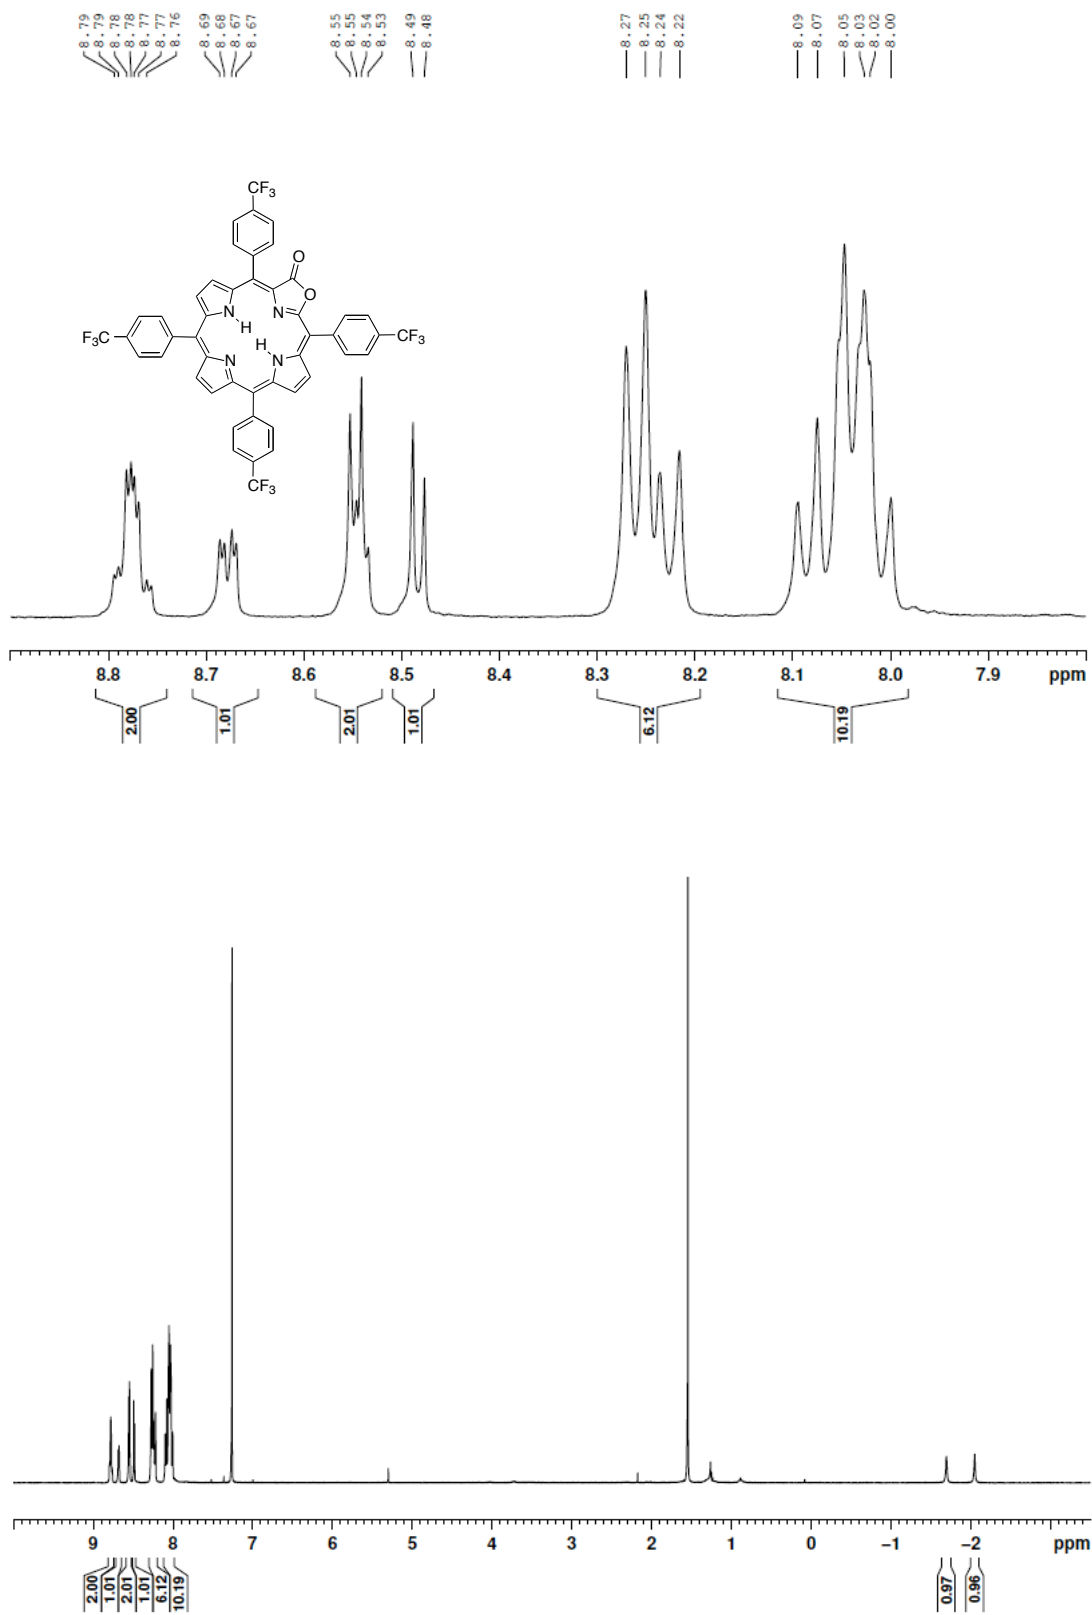

**Figure S21.** <sup>1</sup>H NMR Spectrum (400 MHz, CDCl<sub>3</sub>) of **5fH<sub>2</sub>**

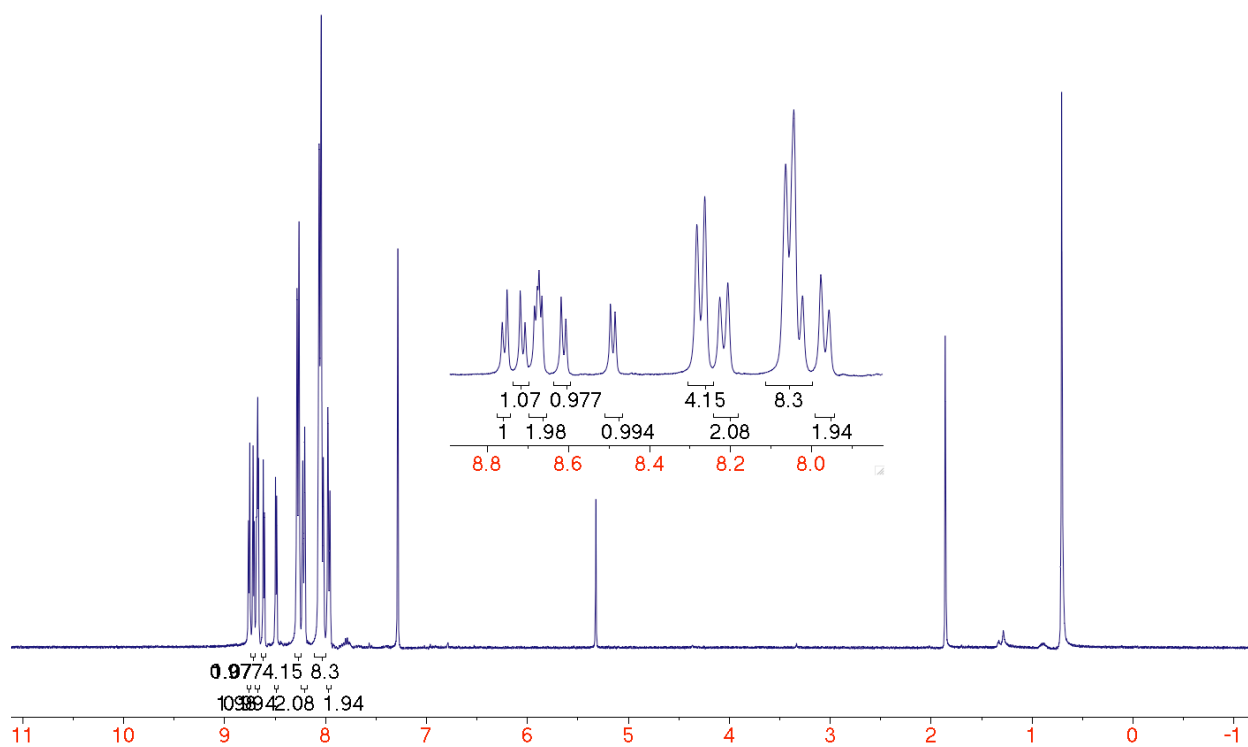

**Figure S22.**  $^1\text{H}$  NMR Spectrum (400 MHz,  $\text{CDCl}_3$ ) of **5fZn**

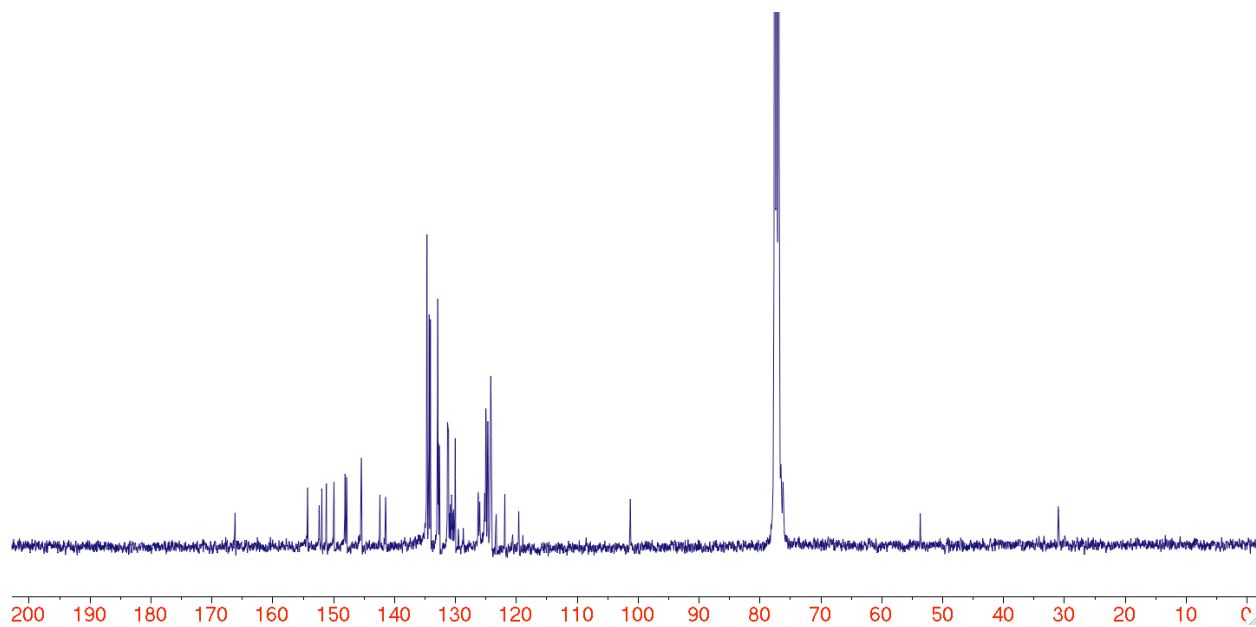

**Figure S23.**  $^{13}\text{C}$  NMR Spectrum (400 MHz,  $\text{CDCl}_3$ ) of **5fZn**



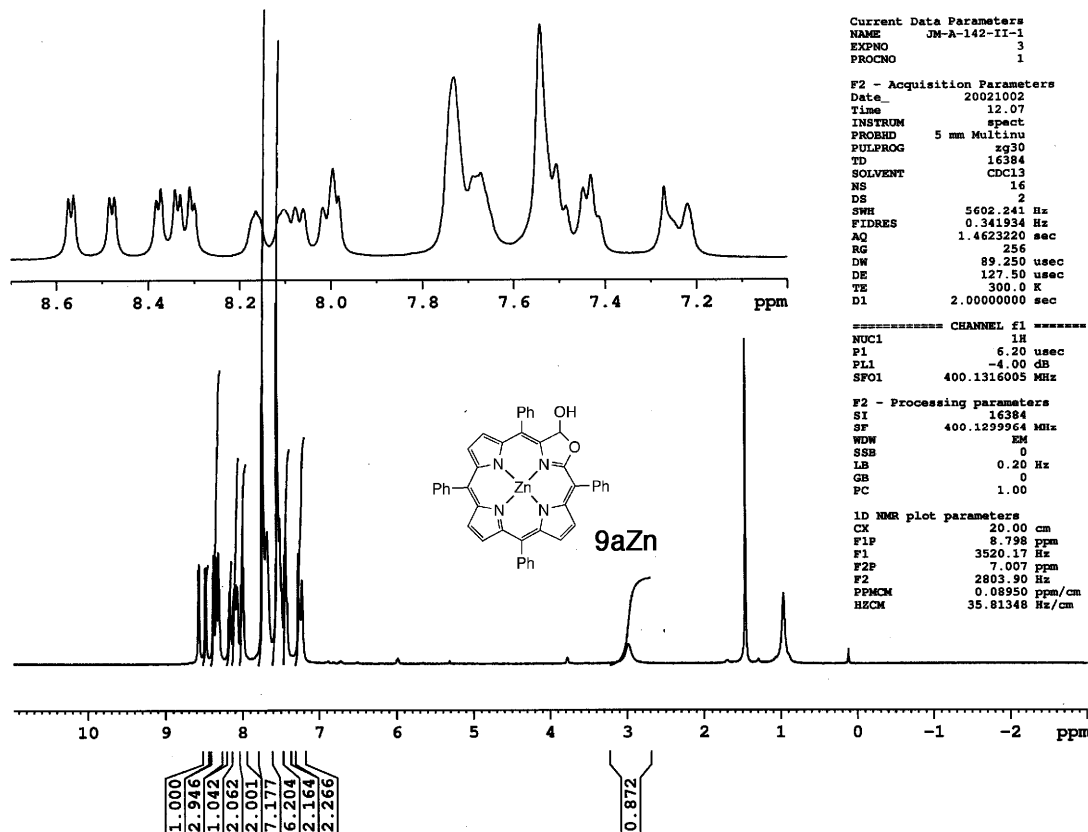

Figure S24. <sup>1</sup>H NMR Spectrum (100 MHz, CDCl<sub>3</sub>) of 9aZn

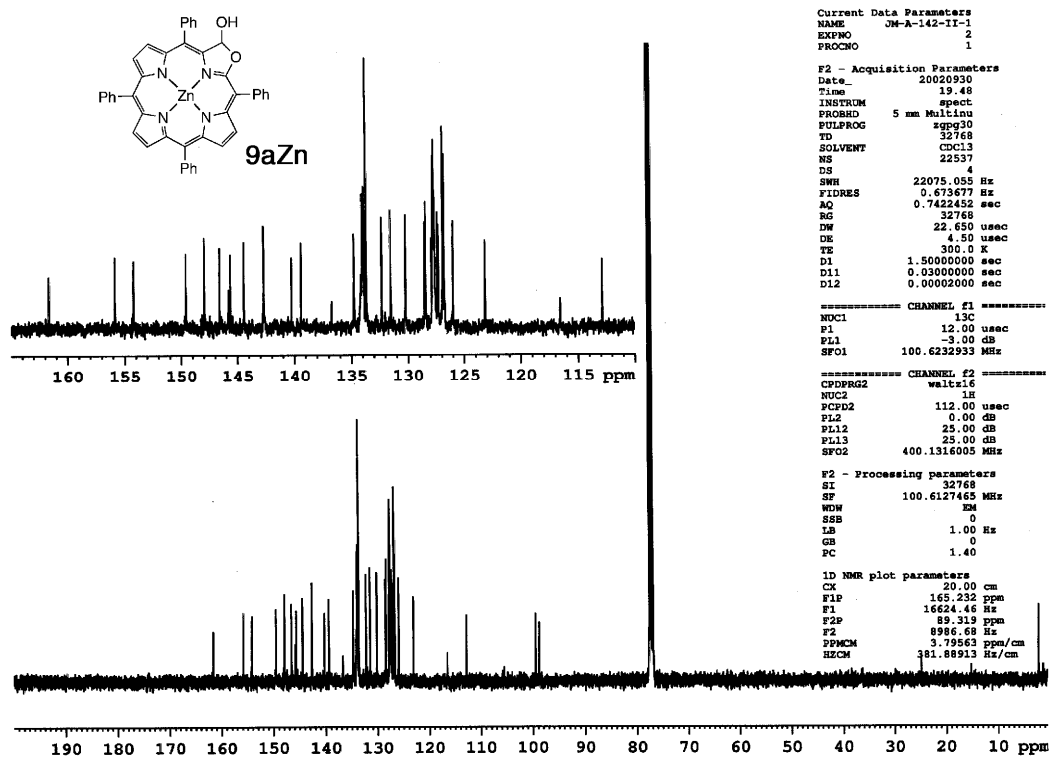

Figure S25. <sup>13</sup>C NMR Spectrum (100 MHz, CDCl<sub>3</sub>) of 9aZn

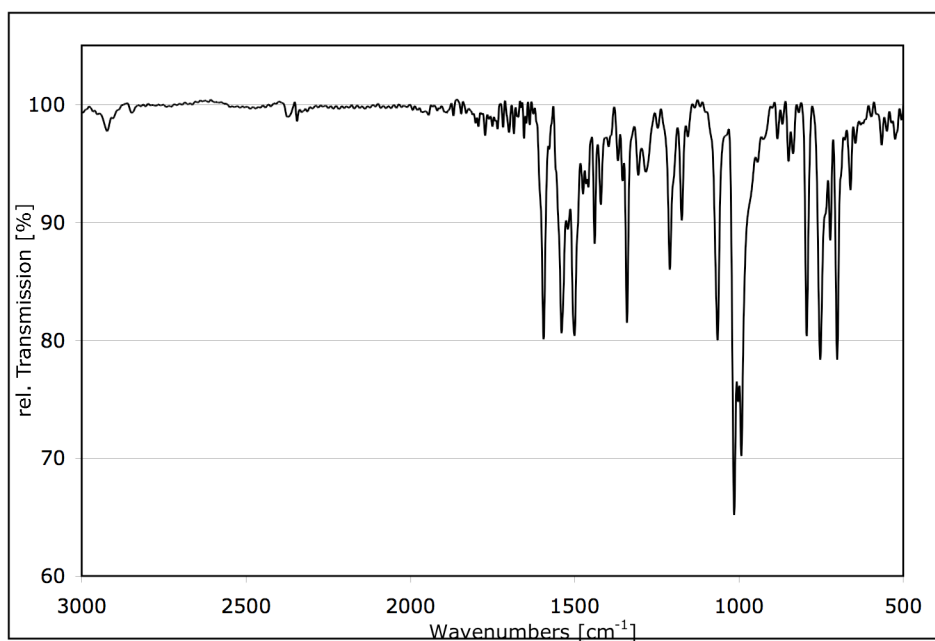

Figure S26. FT-IR Spectrum (KBr) of **9aZn**

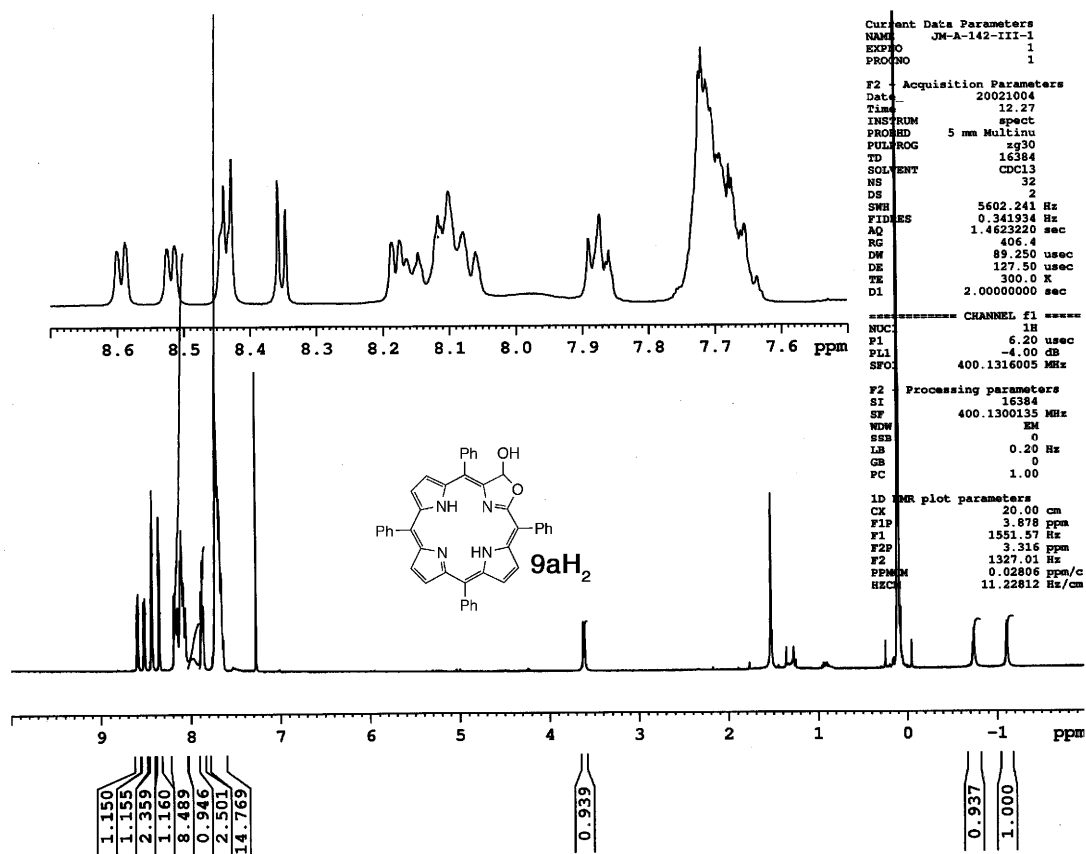

Figure S27.  $^1\text{H}$  NMR Spectrum (100 MHz,  $\text{CDCl}_3$ ) of **9aH<sub>2</sub>**

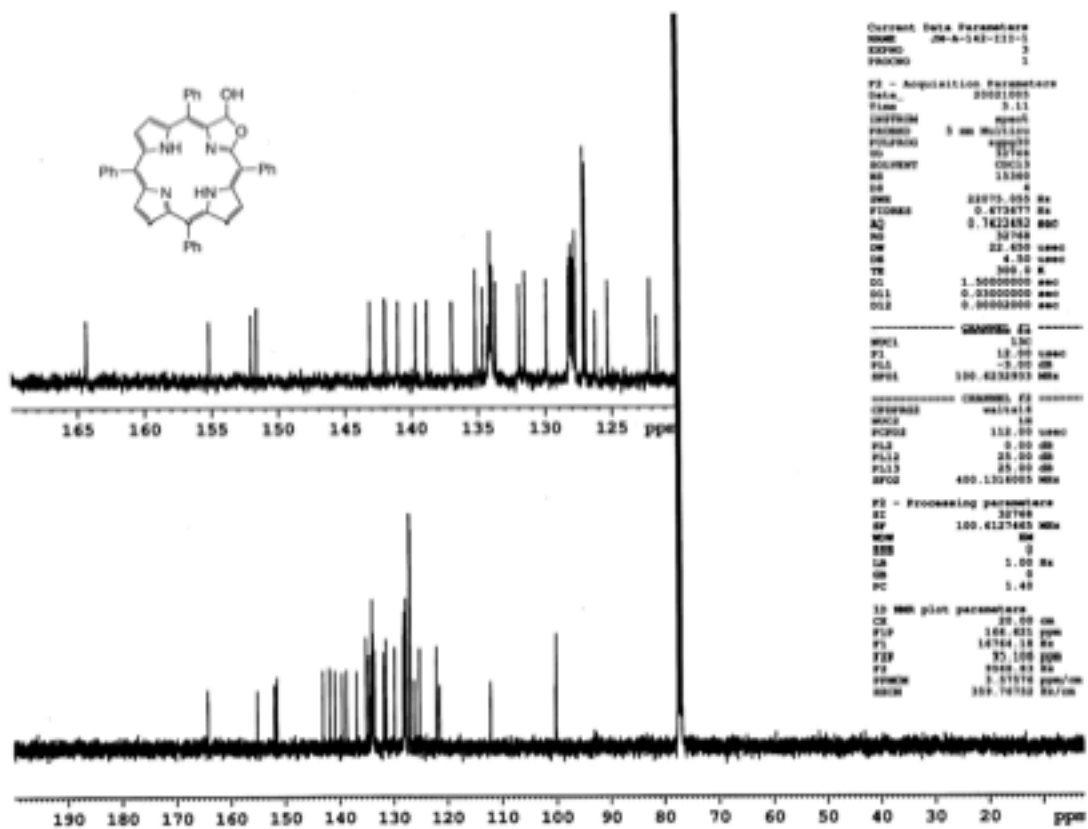

Figure S28.  $^{13}\text{C}$  NMR Spectrum (100 MHz,  $\text{CDCl}_3$ ) of **11aH<sub>2</sub>**

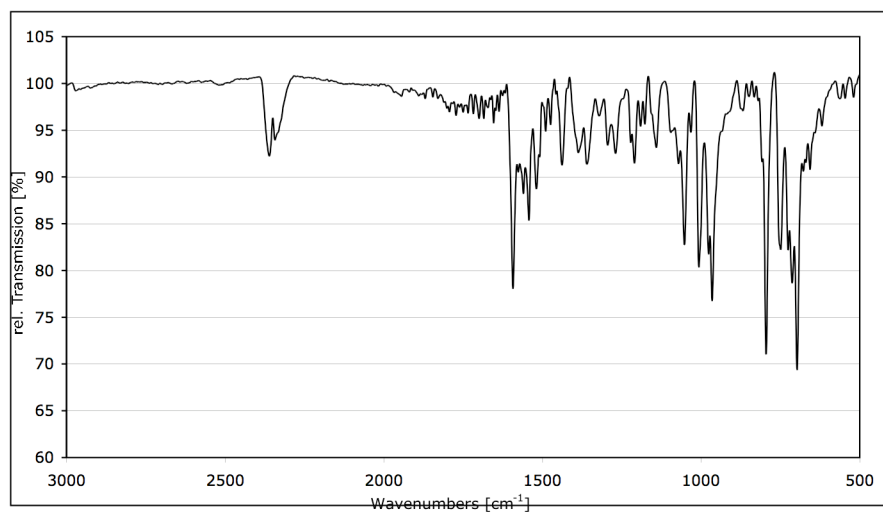

Figure S29. FT-IR Spectrum (KBr) of **11aH<sub>2</sub>**

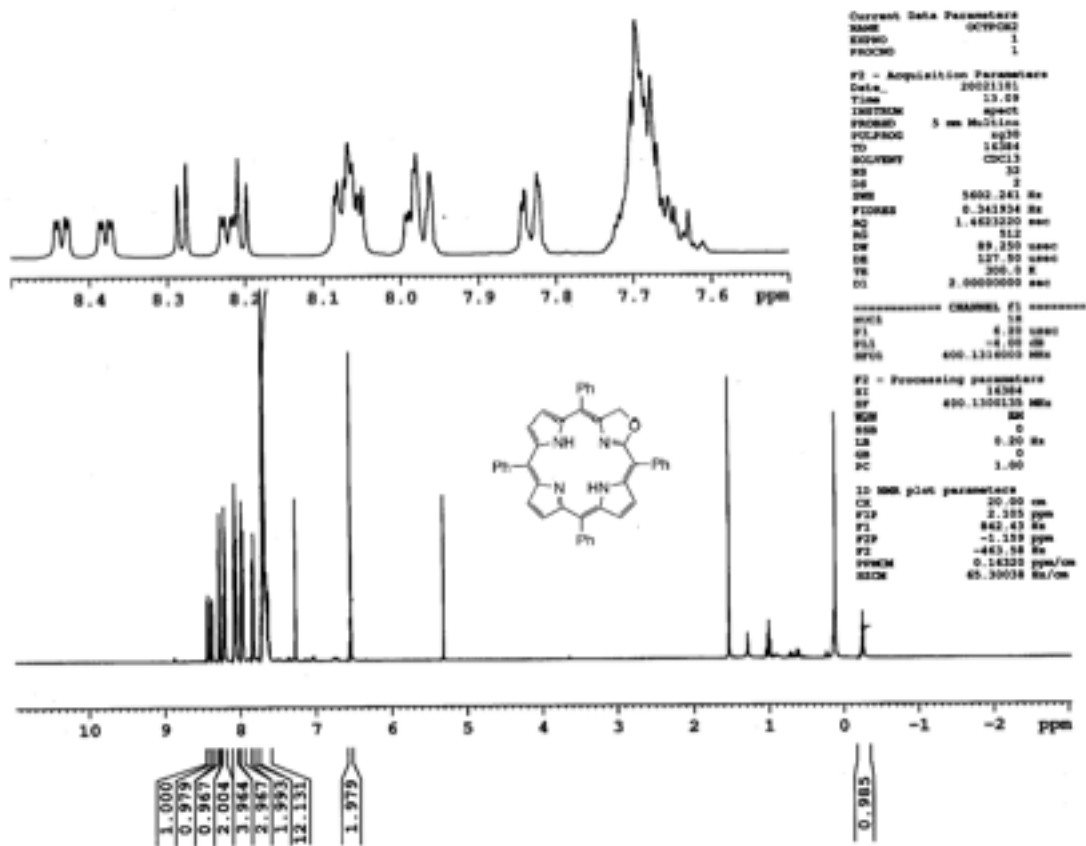

Figure S30.  $^1\text{H}$  NMR Spectrum (100 MHz,  $\text{CDCl}_3$ ) of  $12\text{aH}_2$

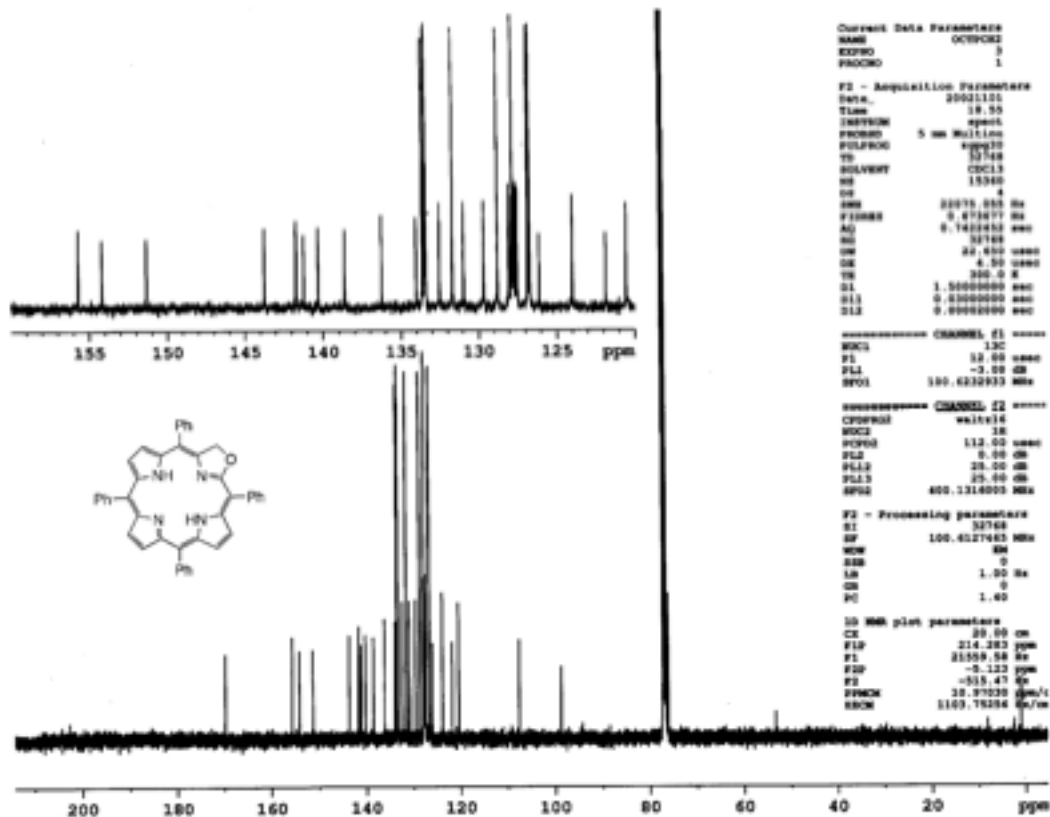

Figure S31.  $^{13}\text{C}$  NMR Spectrum (100 MHz,  $\text{CDCl}_3$ ) of  $12\text{aH}_2$

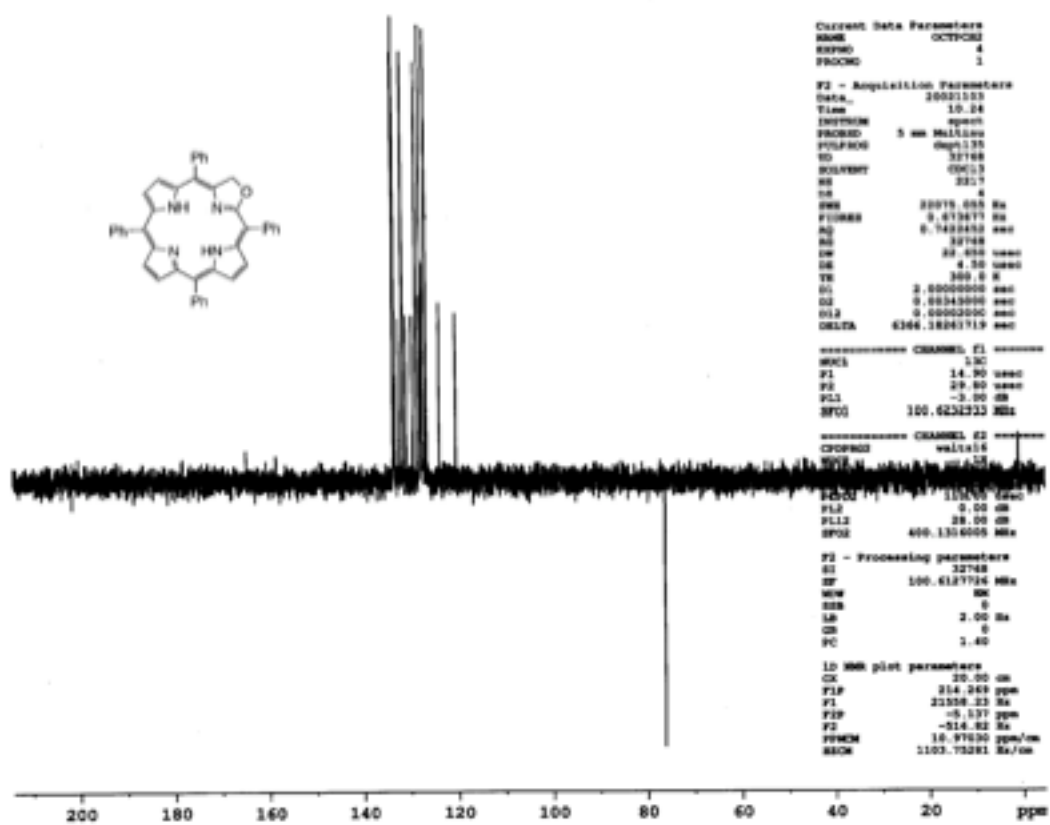

Figure S32. DEPT Spectrum (100 MHz, CDCl<sub>3</sub>) of 12aH<sub>2</sub>

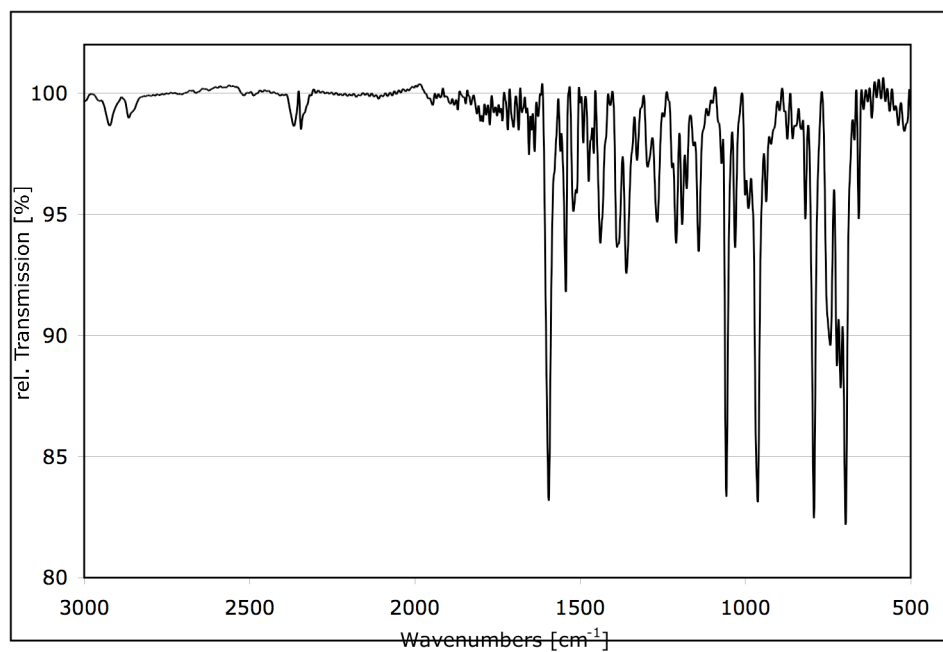

Figure S33. FT-IR Spectrum (KBr) of 12aH<sub>2</sub>

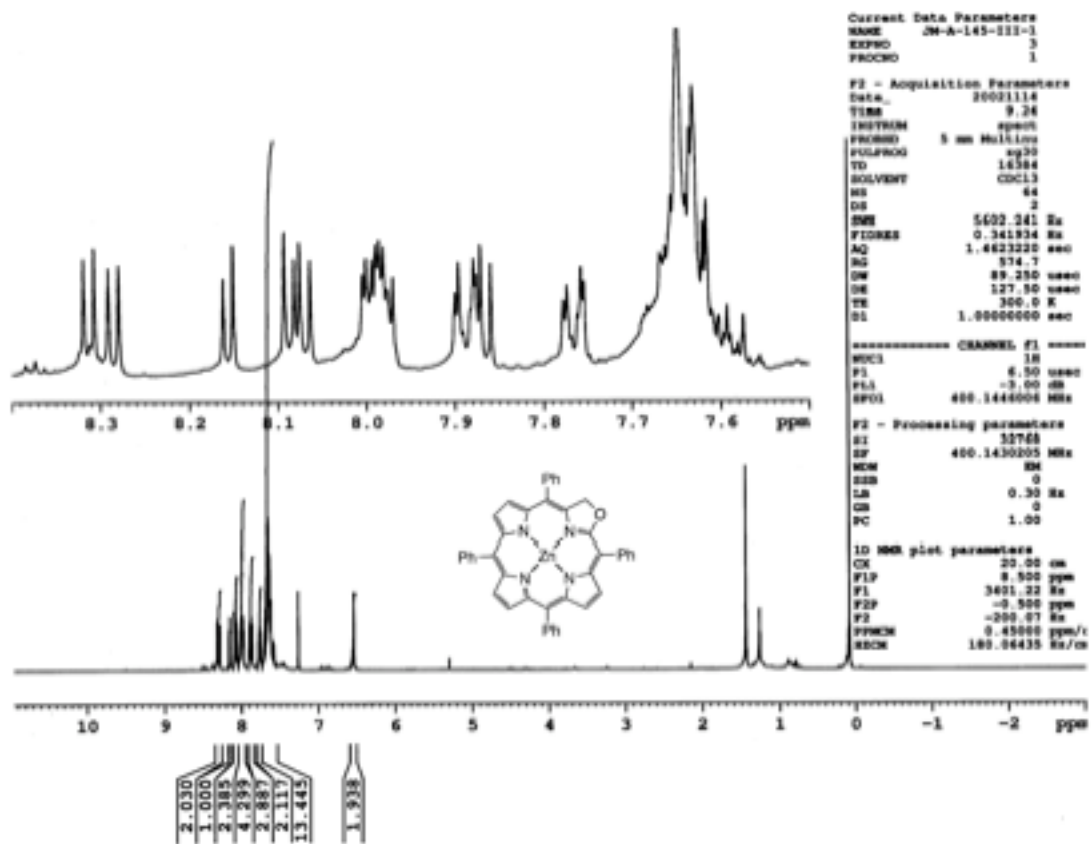

Figure S34.  $^1\text{H}$  NMR Spectrum (100 MHz,  $\text{CDCl}_3$ ) of **12aZn**

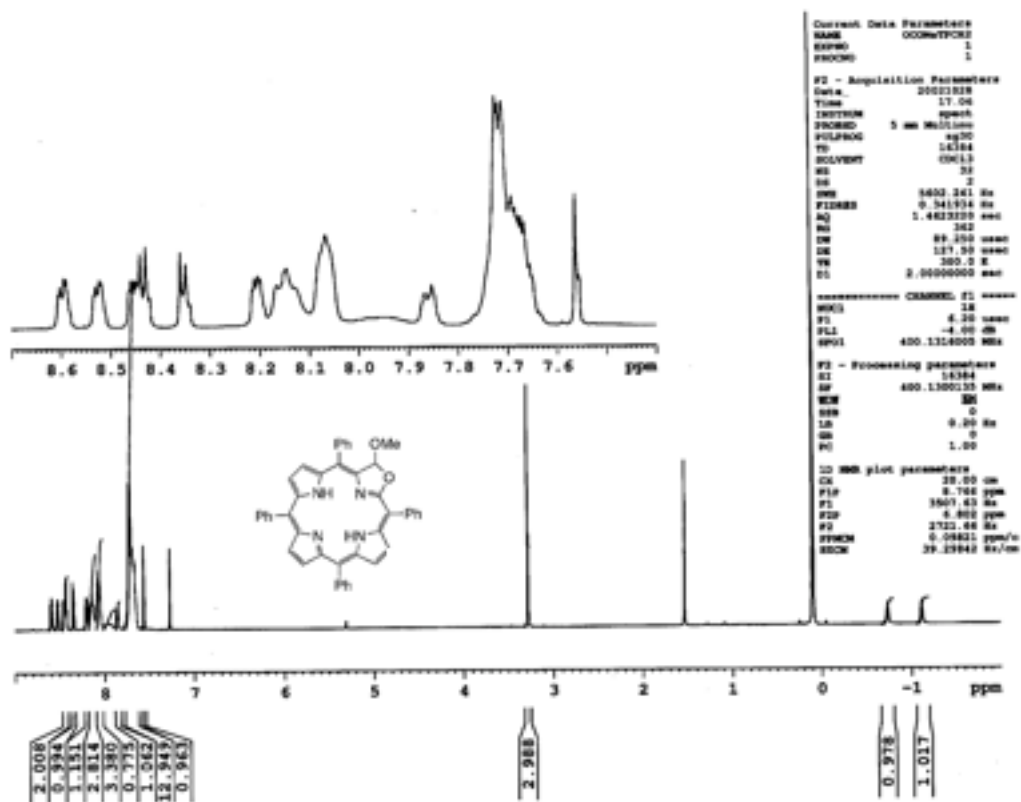

Figure S35. <sup>1</sup>H NMR Spectrum (100 MHz, CDCl<sub>3</sub>) of 13a-OMe

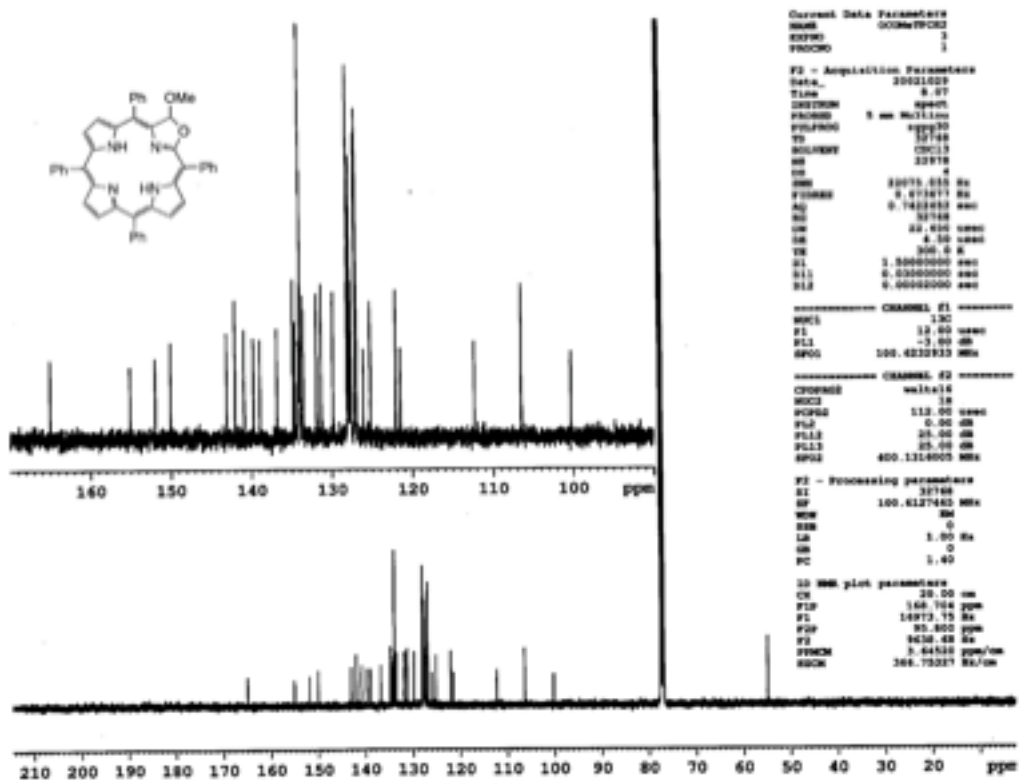

**Figure S36.**  $^{13}\text{C}$  NMR Spectrum (100 MHz,  $\text{CDCl}_3$ ) of **13a-OMe**



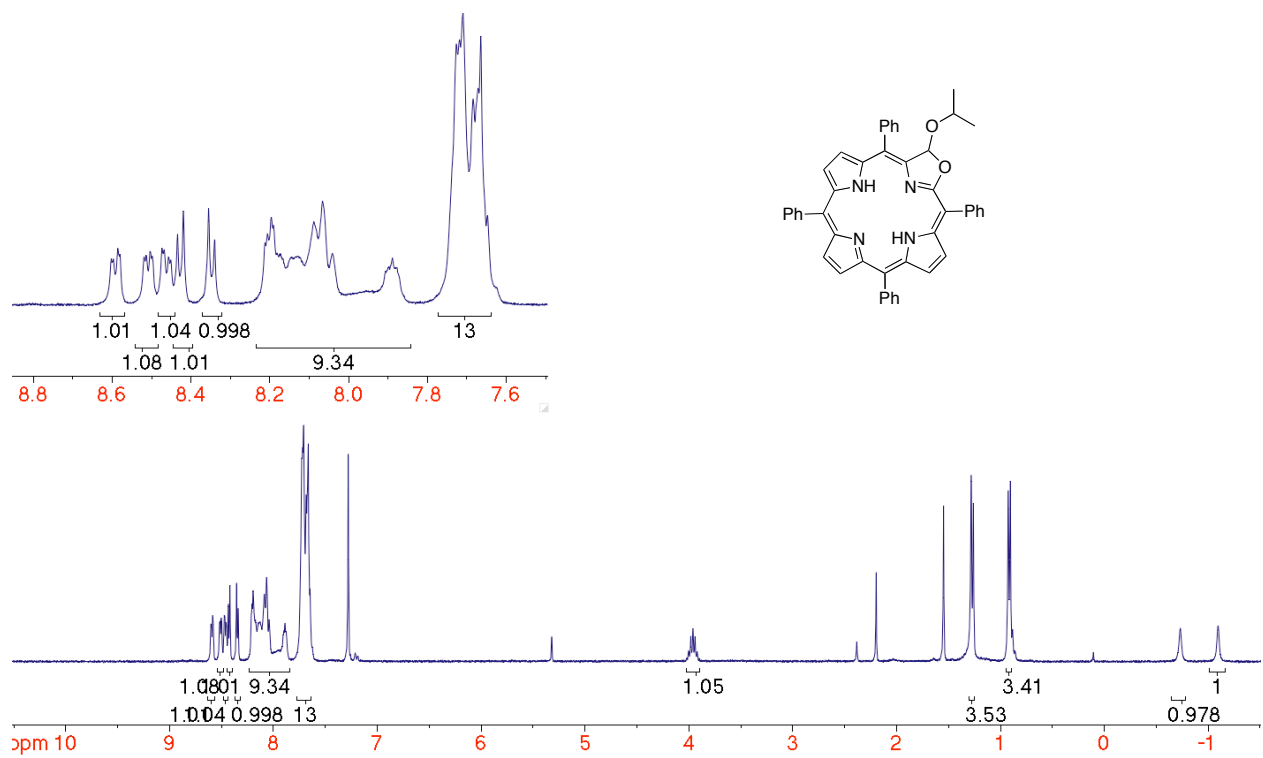

**Figure S37.** <sup>1</sup>H NMR spectrum (300 MHz, CDCl<sub>3</sub>) of 13a-O<sup>i</sup>Pr

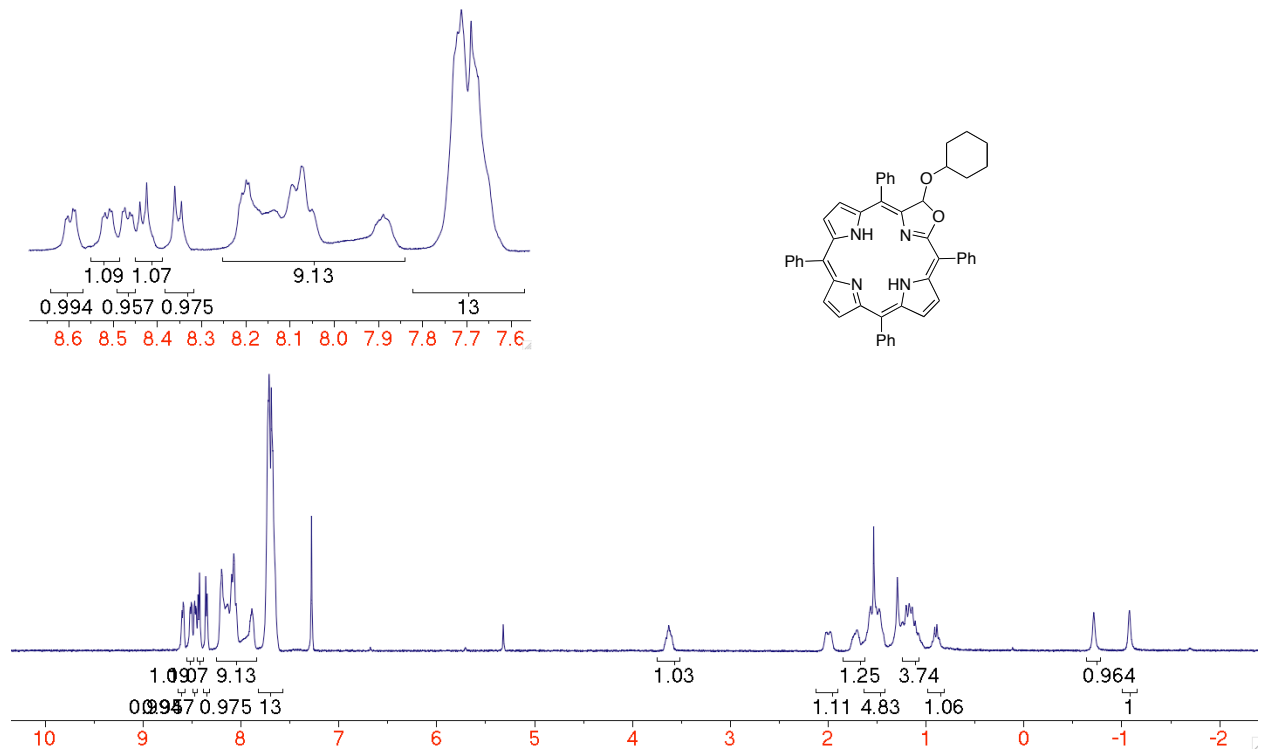

Figure S38.  $^1\text{H}$  NMR spectrum (300 MHz,  $\text{CDCl}_3$ ) of 13a-OHex

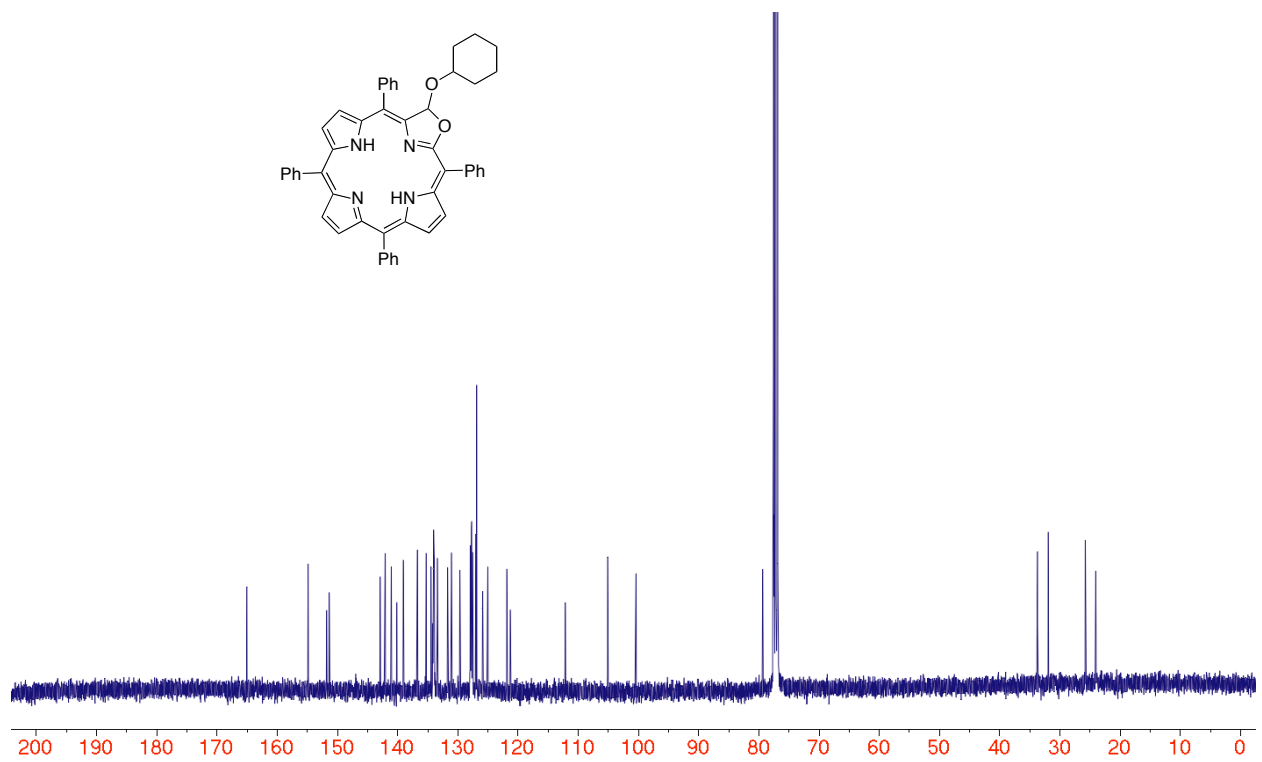

Figure S39.  $^{13}\text{C}$  NMR spectrum (100 MHz,  $\text{CDCl}_3$ ) of 13a-OHex

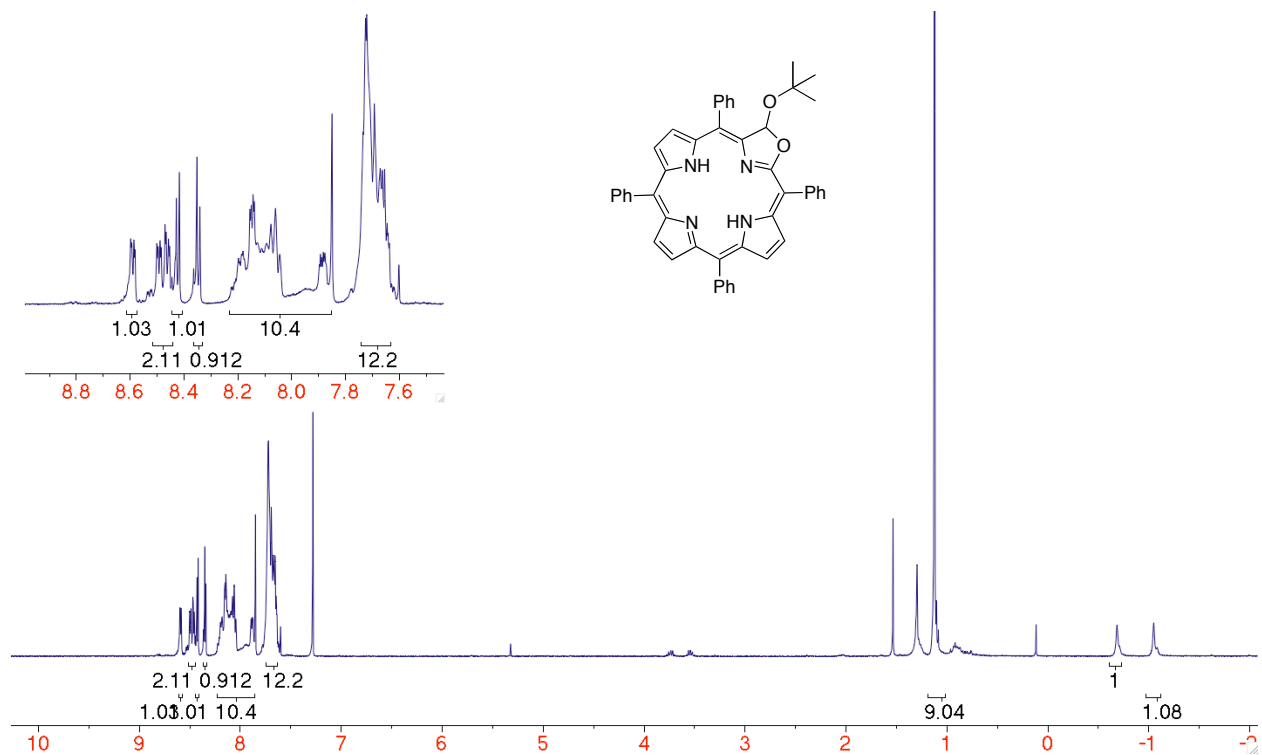

**Figure S40.**  $^1\text{H}$  NMR spectrum (300 MHz,  $\text{CDCl}_3$ ) of **13a-O<sup>t</sup>Bu**

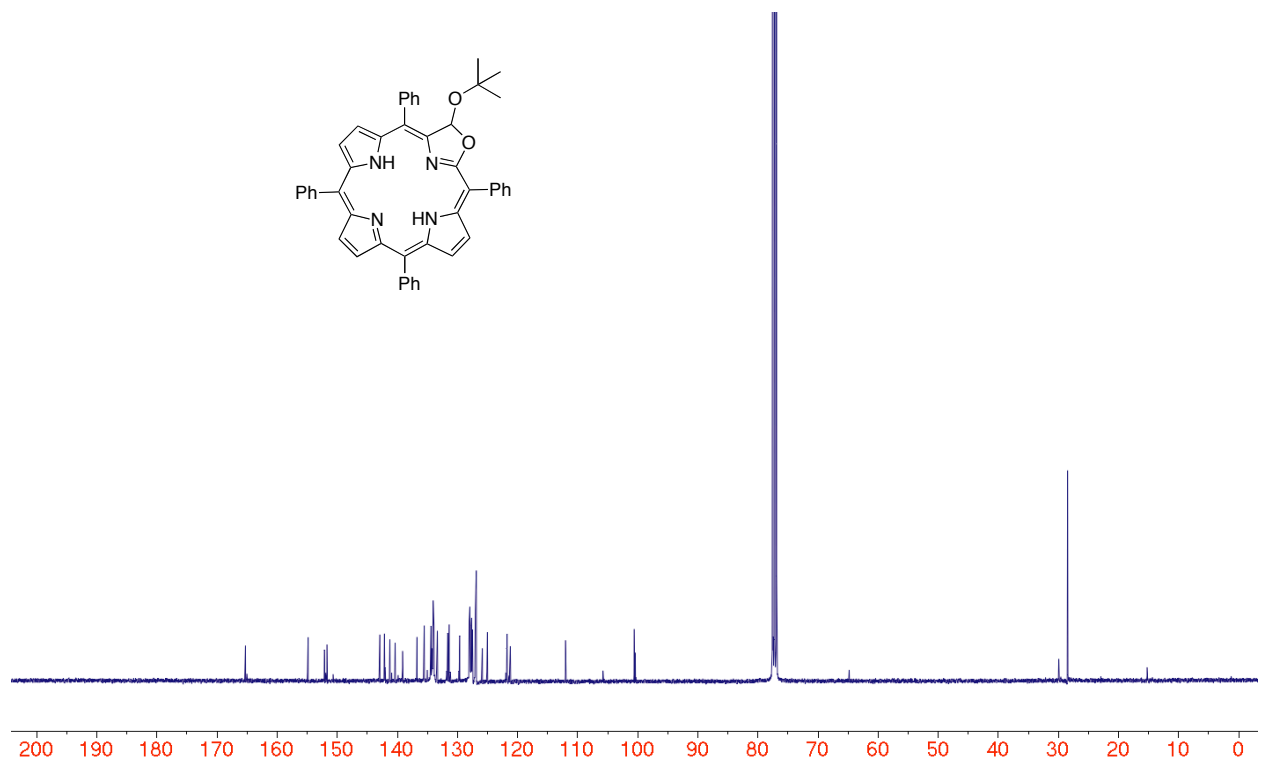

**Figure S41.**  $^{13}\text{C}$  NMR spectrum (100 MHz,  $\text{CDCl}_3$ ) of **13a-O<sup>t</sup>Bu**

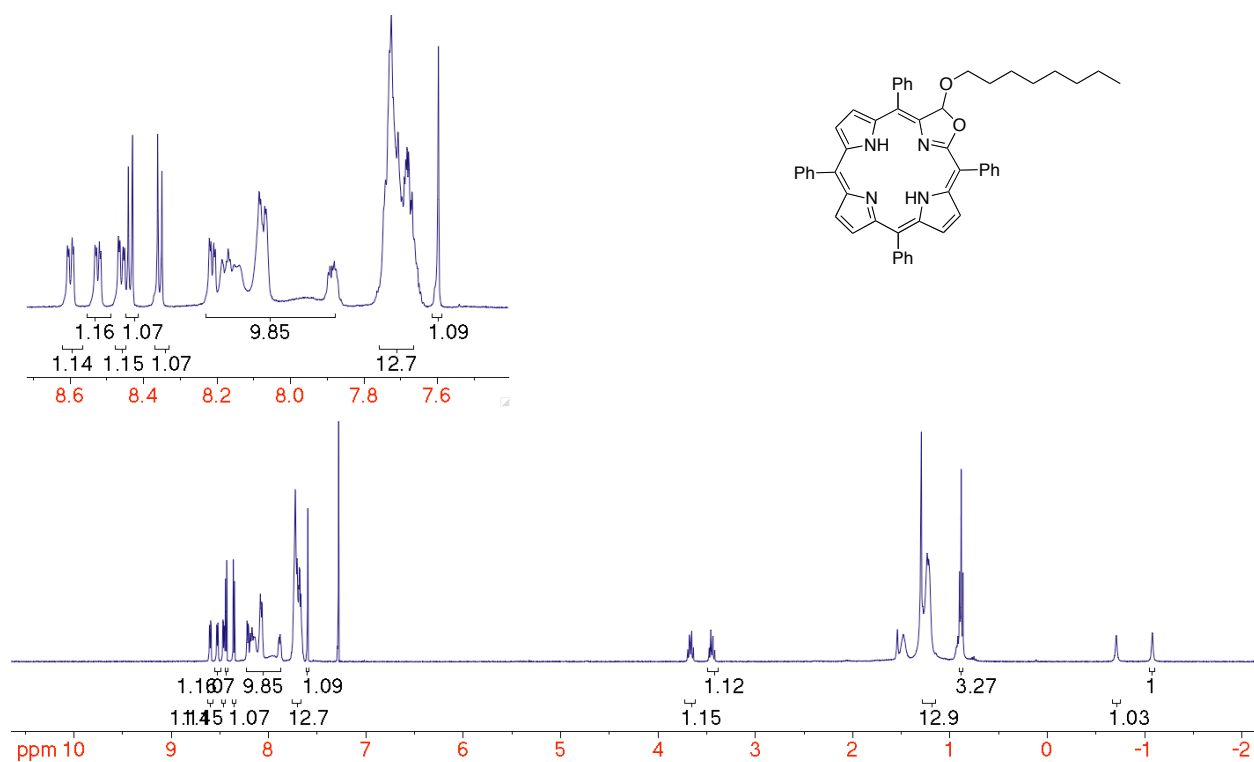

**Figure S42.**  $^1\text{H}$  NMR spectrum (300 MHz,  $\text{CDCl}_3$ ) of **13a-O<sup>n</sup>Oct**

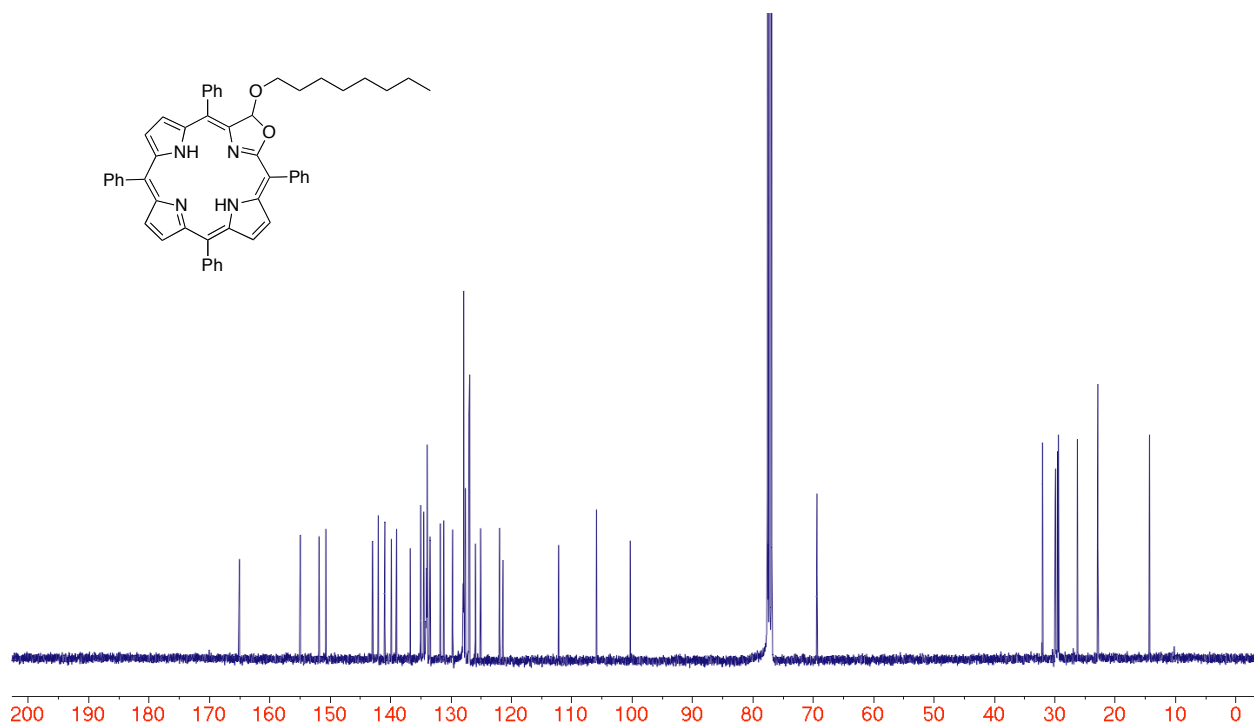

**Figure S43.**  $^{13}\text{C}$  NMR spectrum (100 MHz,  $\text{CDCl}_3$ ) of **13a-O<sup>m</sup>Oct**

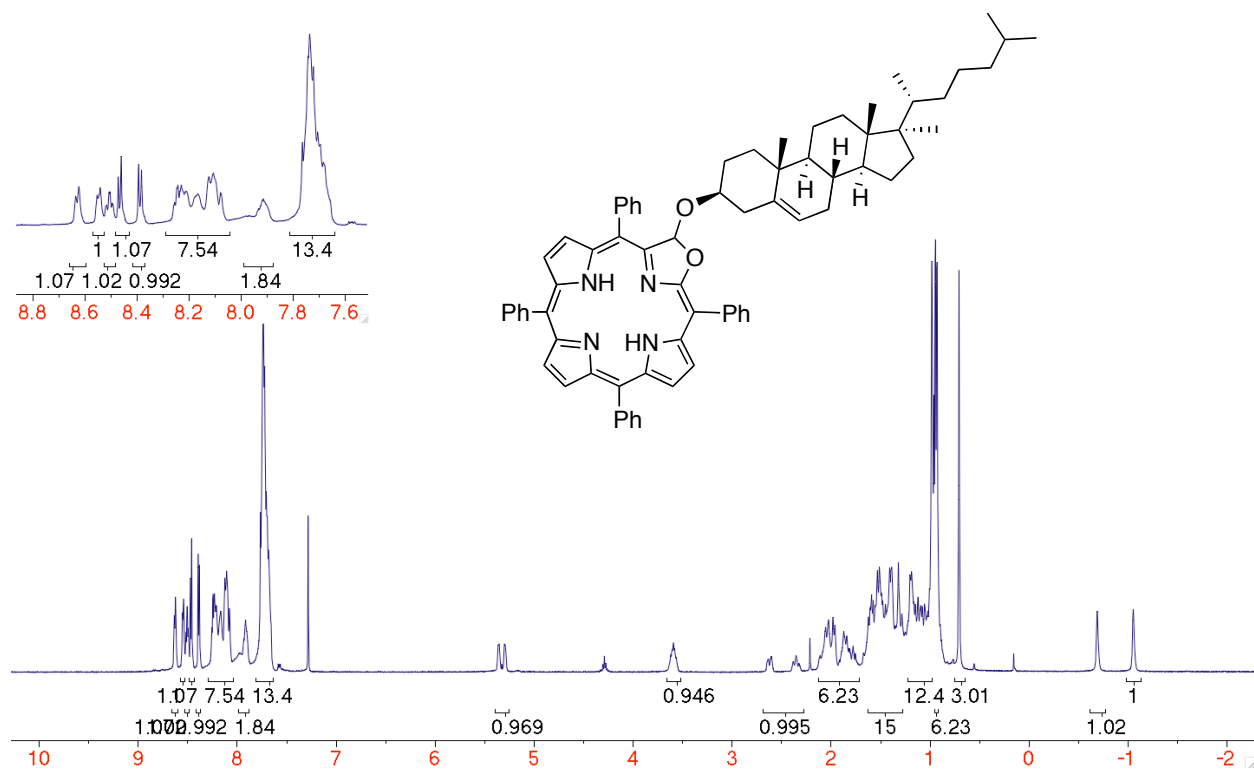

**Figure S44.**  $^1\text{H}$  NMR spectrum (400 MHz,  $\text{CDCl}_3$ ) of **13a-Ochol**

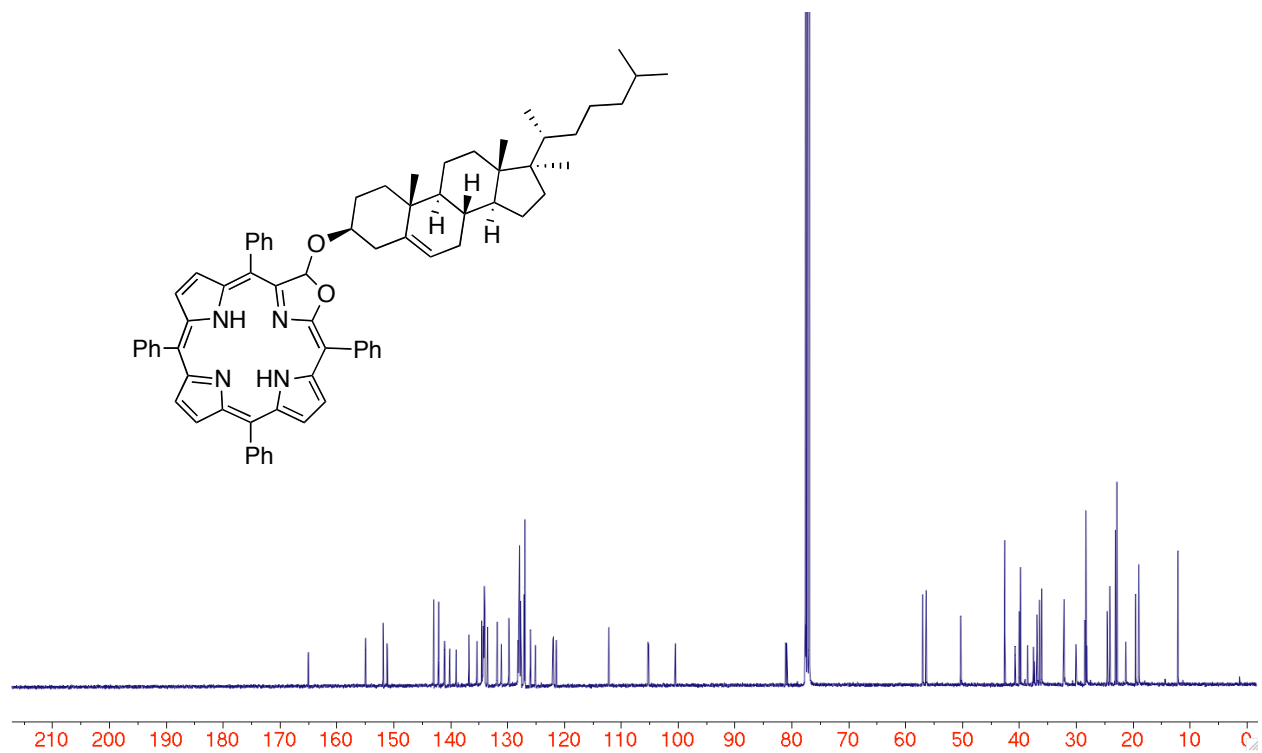

**Figure S45.**  $^{13}\text{C}$  NMR spectrum (100 MHz,  $\text{CDCl}_3$ ) of **13a-Ochol**

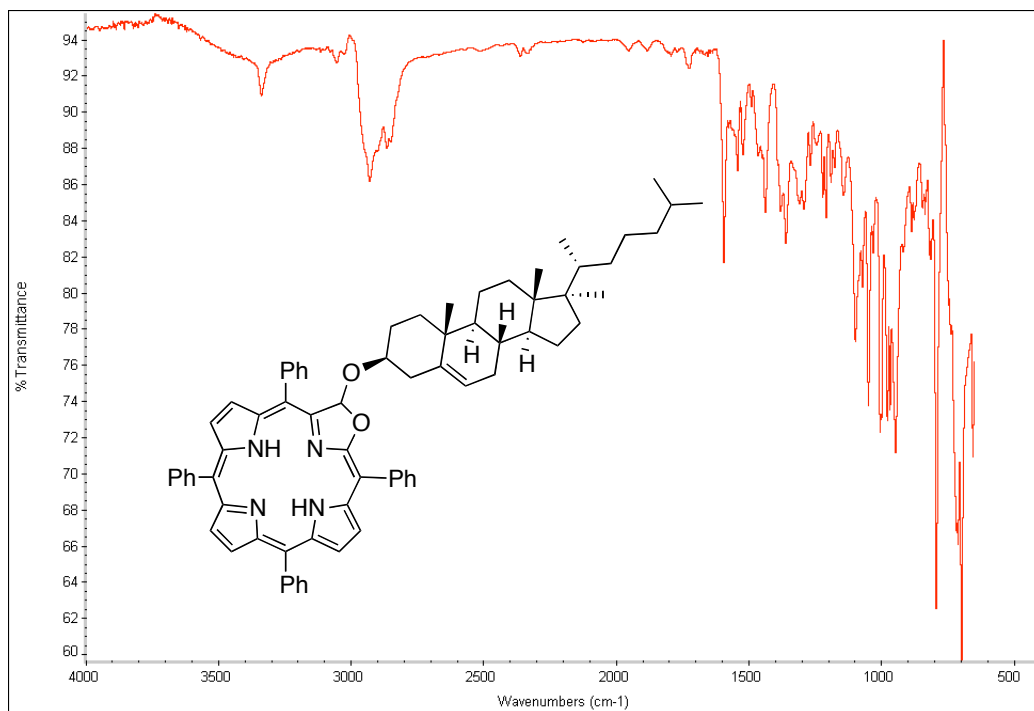

**Figure S46.** FT-IR spectrum (neat, diffuse reflectance) of **13a-OChol**

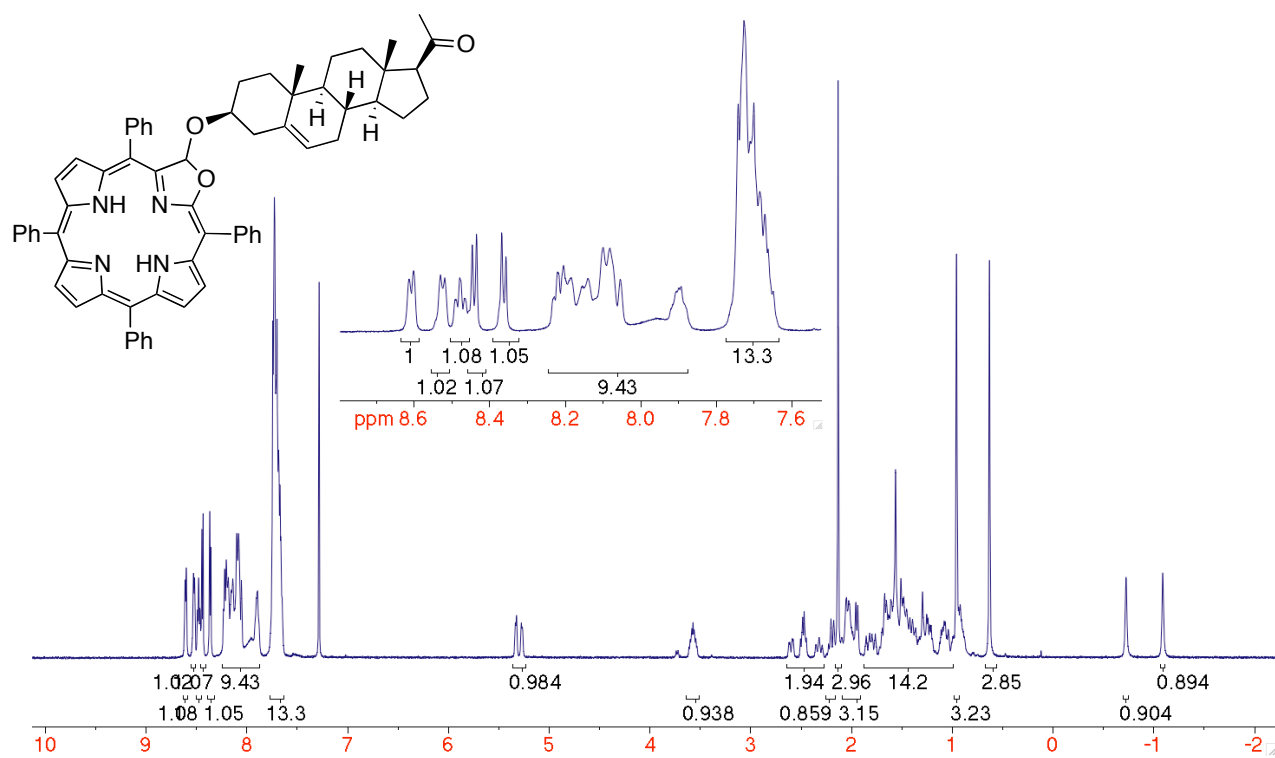

**Figure S47.**  $^1\text{H}$  NMR spectrum (400 MHz,  $\text{CDCl}_3$ ) of **13a-OPreg**

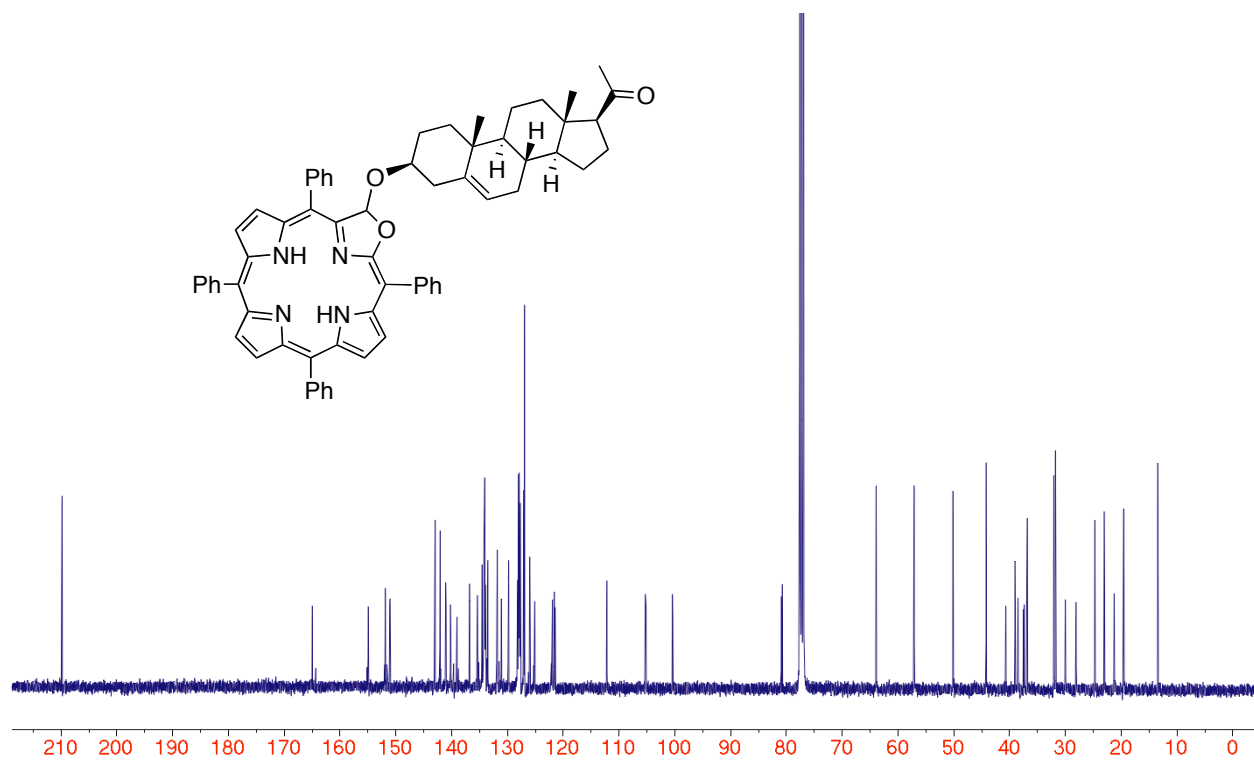

**Figure S48.**  $^{13}\text{C}$  NMR spectrum (100 MHz,  $\text{CDCl}_3$ ) of **13a-OPreg**

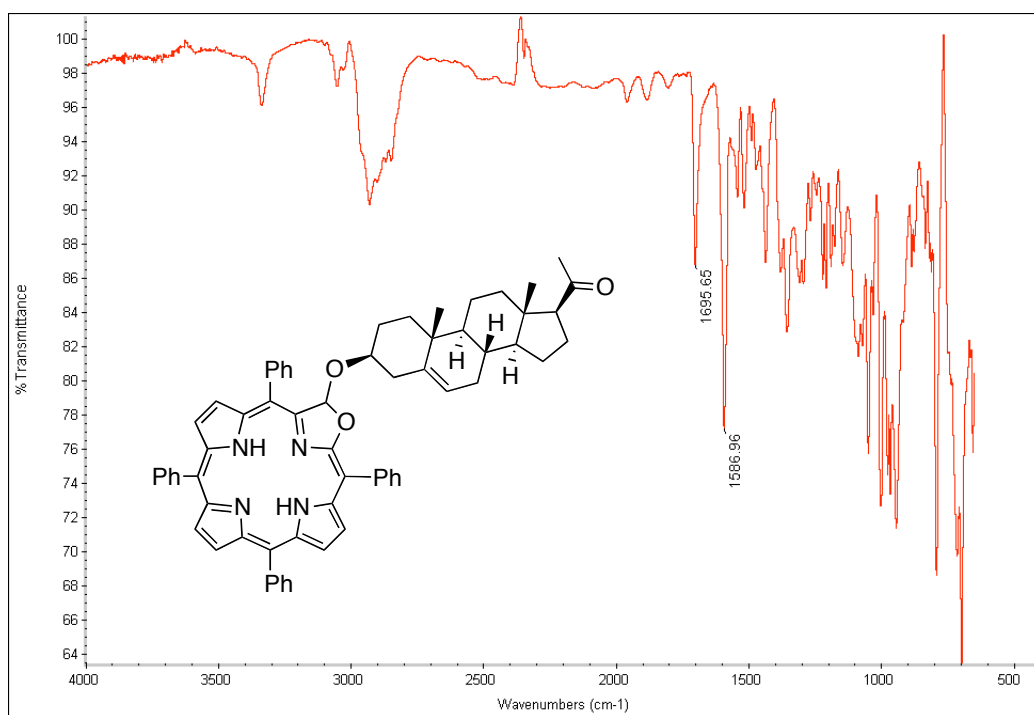

**Figure S49.** FT-IR spectrum (neat, diffuse reflectance) of **13a-OPreg**

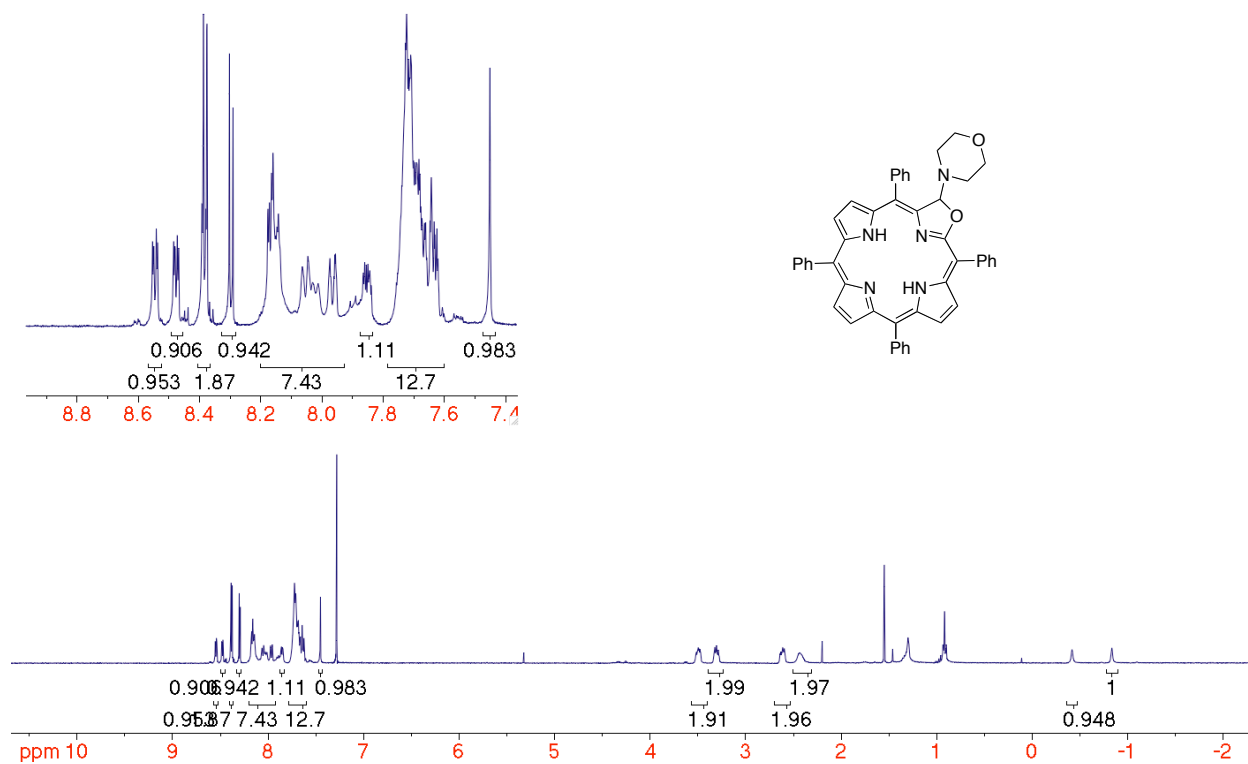

**Figure S50.**  $^1\text{H}$  NMR spectrum (300 MHz,  $\text{CDCl}_3$ ) of **13a-N<sup>morph</sup>**

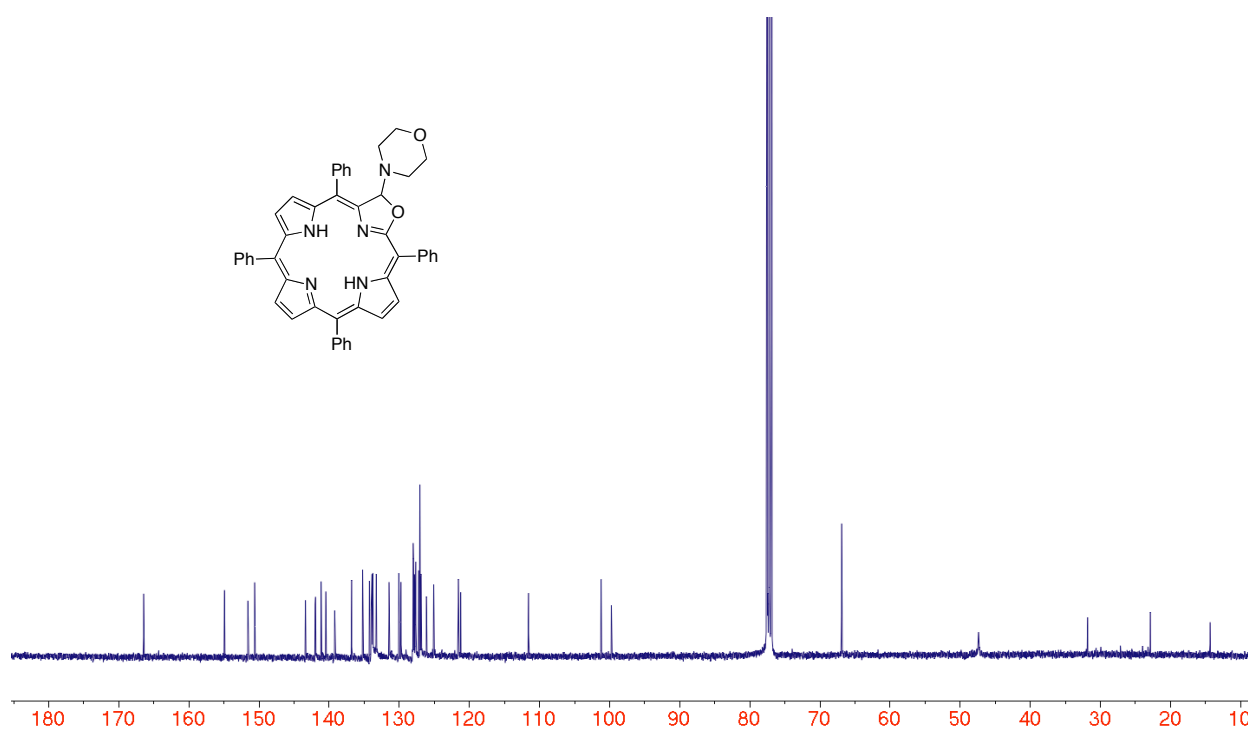

**Figure S51.**  $^{13}\text{C}$  NMR spectrum (100 MHz,  $\text{CDCl}_3$ ) of **13a-N<sup>morph</sup>**



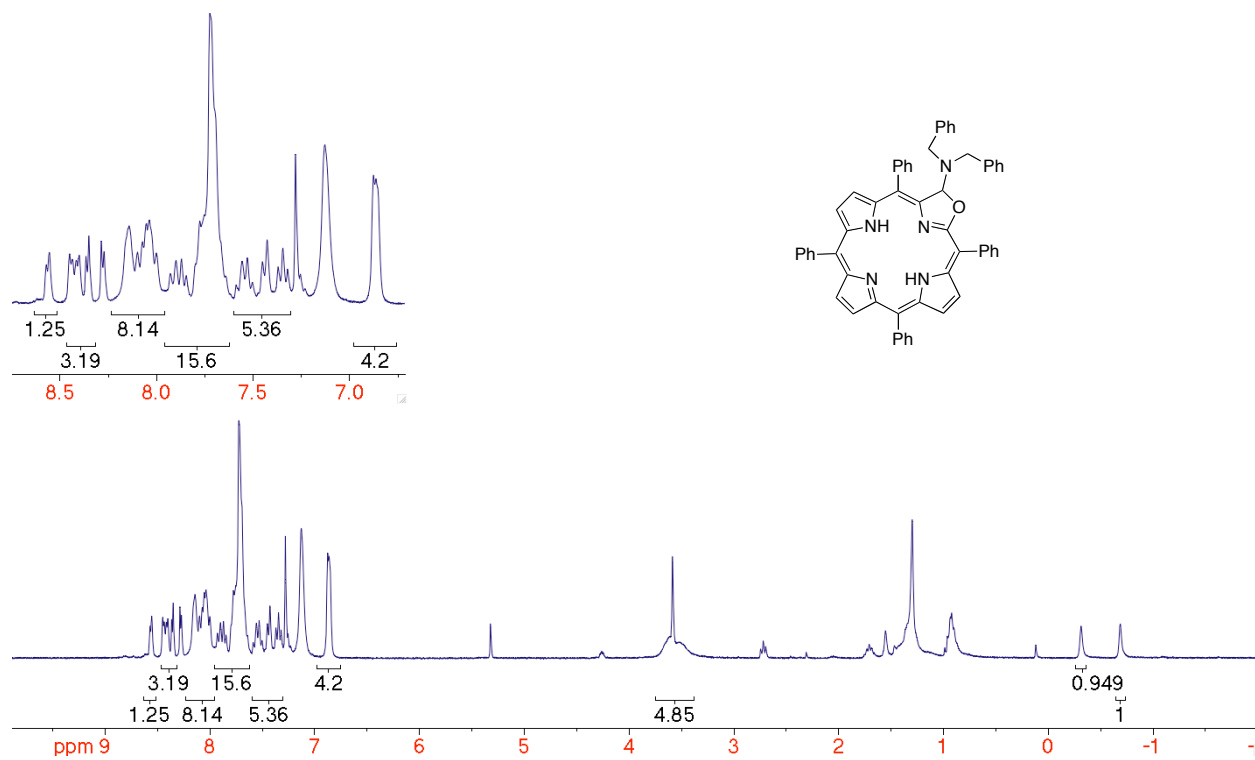

**Figure S52.**  $^1\text{H}$  NMR spectrum (300 MHz,  $\text{CDCl}_3$ ) of **13a-N(Bn)<sub>2</sub>**

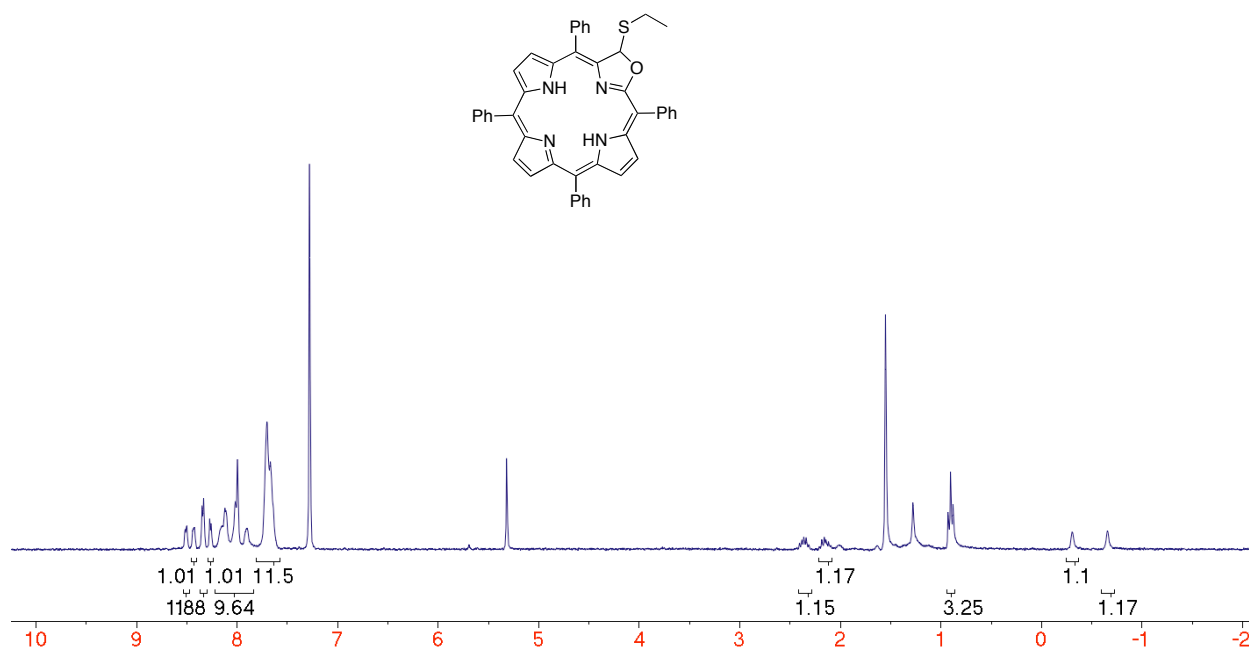

**Figure S53.** <sup>1</sup>H NMR spectrum (300 MHz, CDCl<sub>3</sub>) of **13a-SEt**

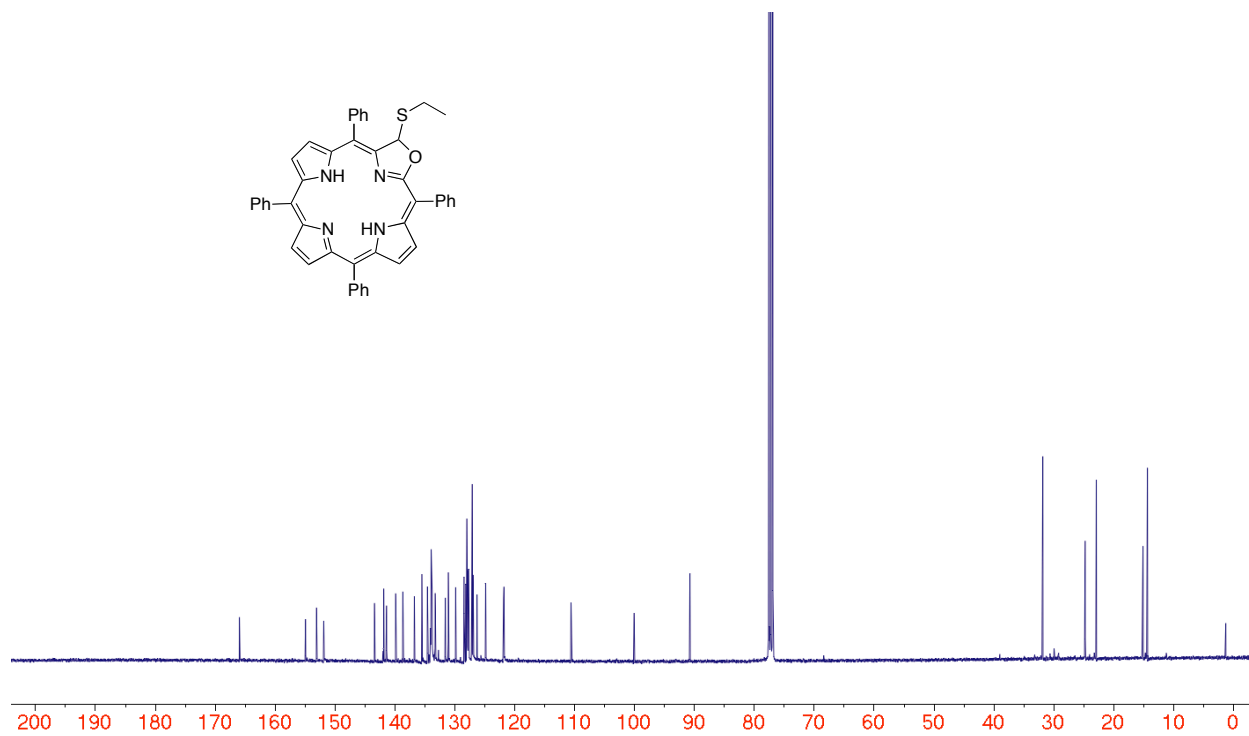

**Figure S54.** <sup>13</sup>C NMR spectrum (100 MHz, CDCl<sub>3</sub>) of **13a-SEt**

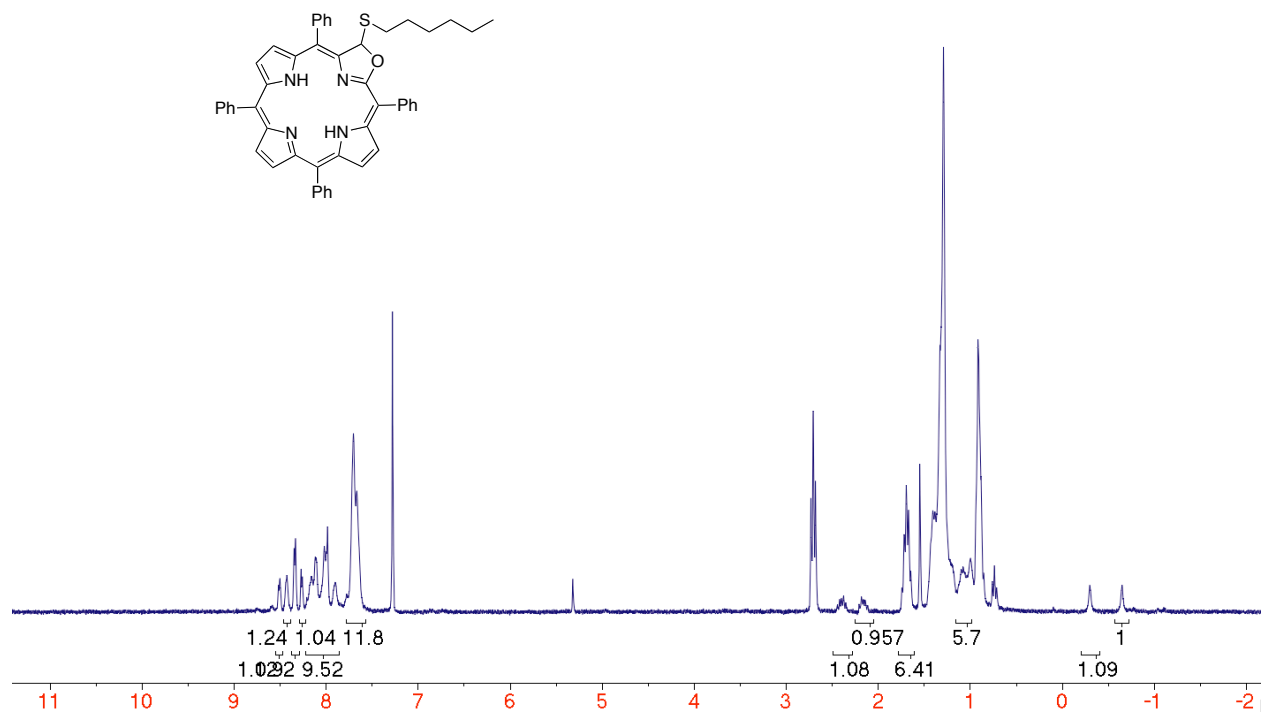

**Figure S55.** <sup>1</sup>H NMR spectrum (300 MHz, CDCl<sub>3</sub>) of 13a-S<sup>n</sup>Hex

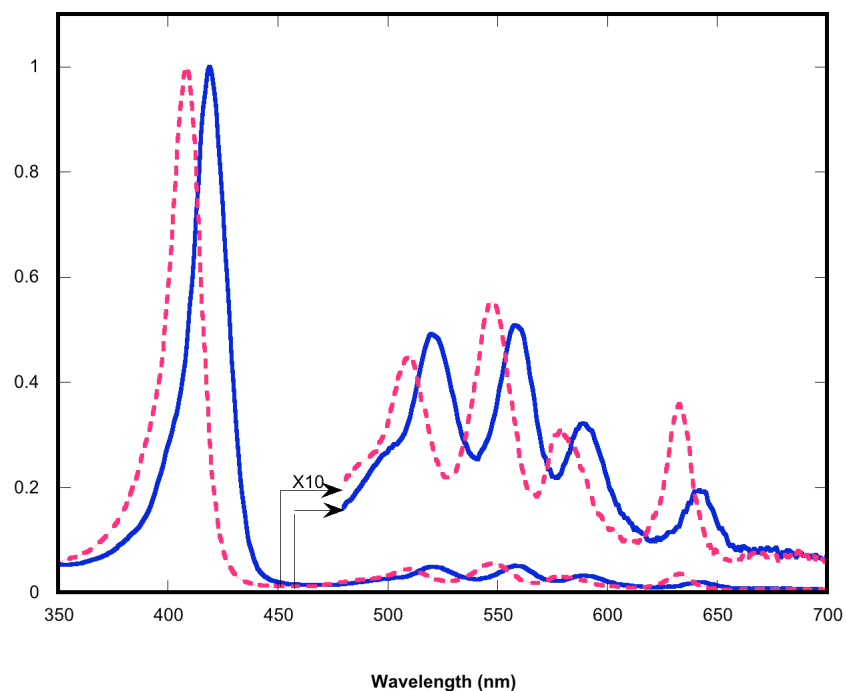

**Figure S56.** Normalized UV-visible spectra of porpholactones **5aH<sub>2</sub>** (blue, solid trace) and **15-II-H<sub>2</sub>** (red, dotted trace)

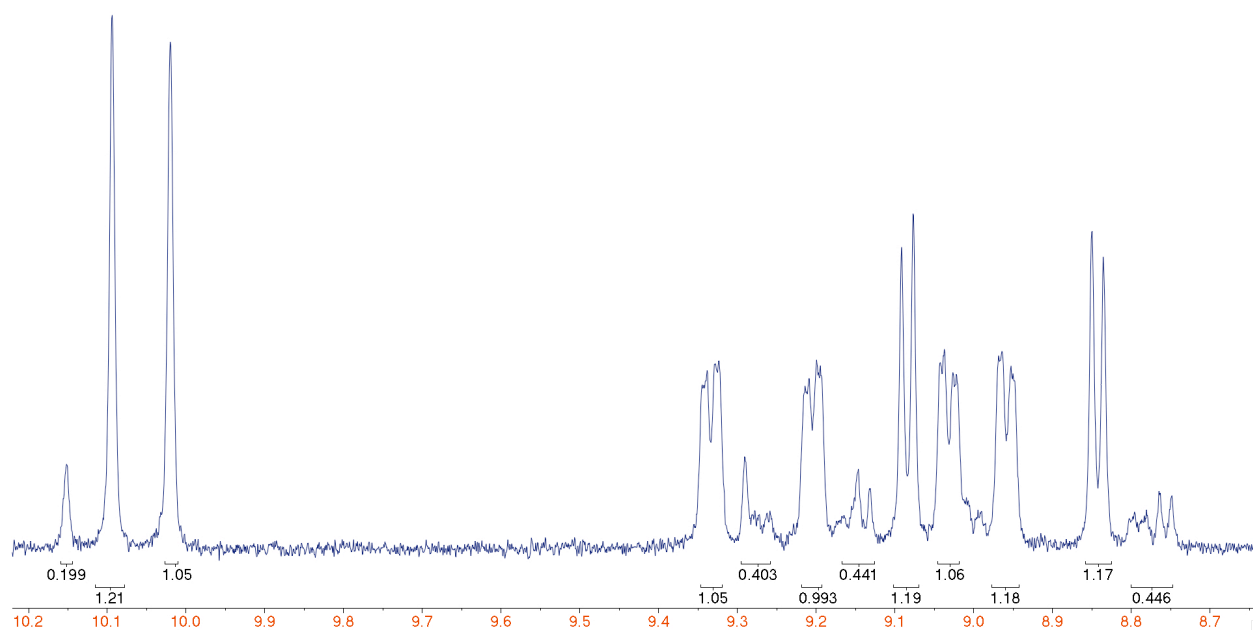

**Figure S57.** <sup>1</sup>H NMR (400 MHz, CDCl<sub>3</sub>) of a mixture of the two regio-isomers of 5,15-diphenylporpholactones, **15-I-H<sub>2</sub>** and **15-II-H<sub>2</sub>**

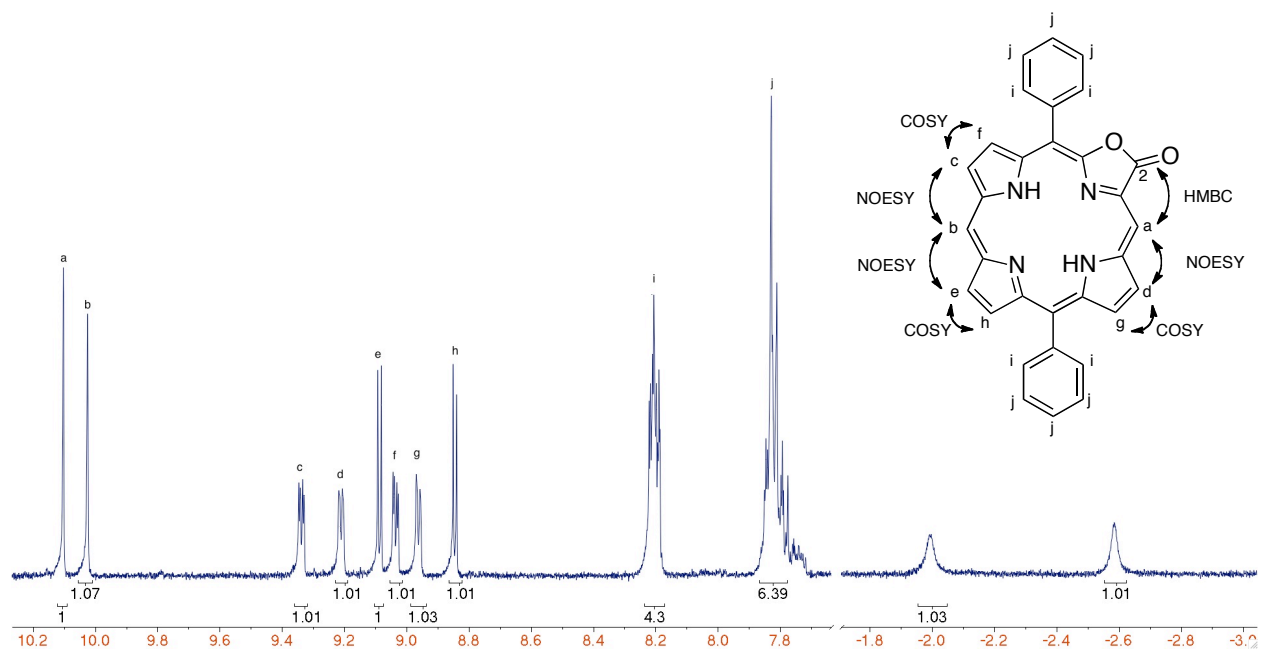

**Figure S58.**  $^1\text{H}$  NMR (300 MHz,  $\text{CDCl}_3$ ) of **15-II-H<sub>2</sub>**. Assignment of proton signals as shown, and based on the 2D spectra shown below.

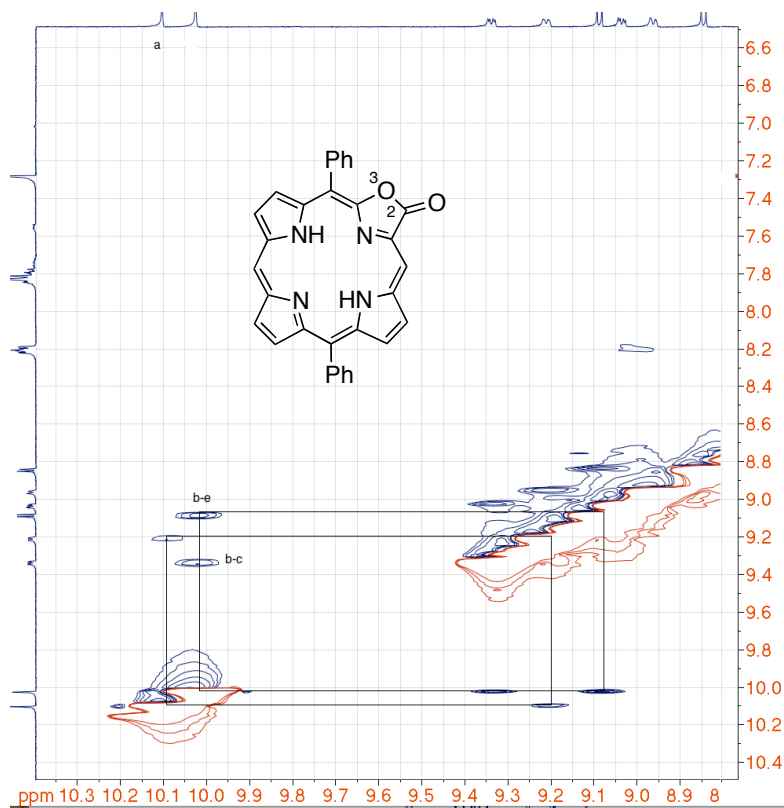

**Figure S59.** NOESY Spectrum (300 MHz,  $\text{CDCl}_3$ ) of **15-II-H<sub>2</sub>**.

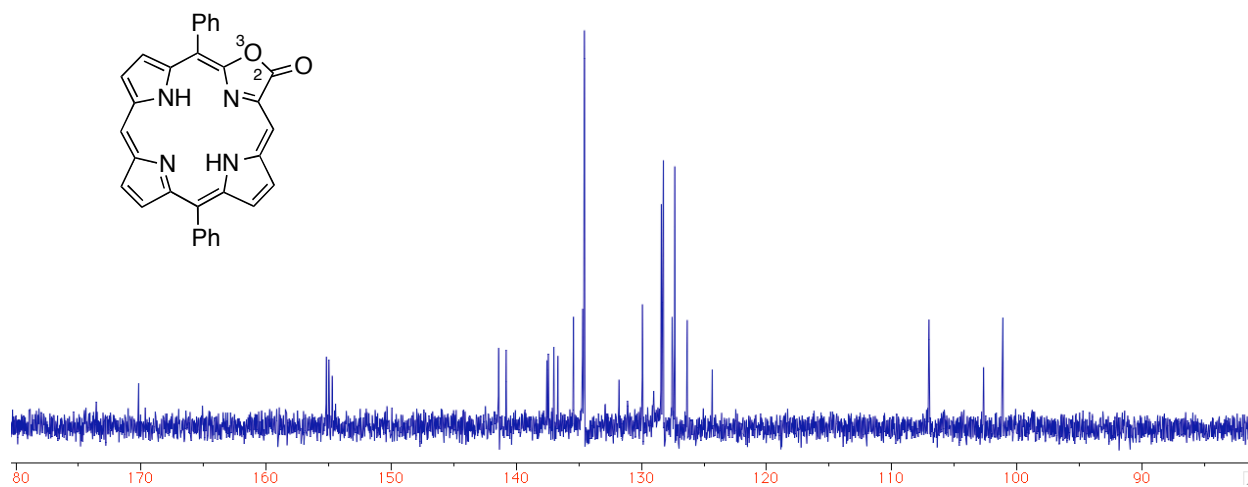

**Figure S60.** <sup>13</sup>C NMR (100 MHz, CDCl<sub>3</sub>) of **15-II-H<sub>2</sub>**.

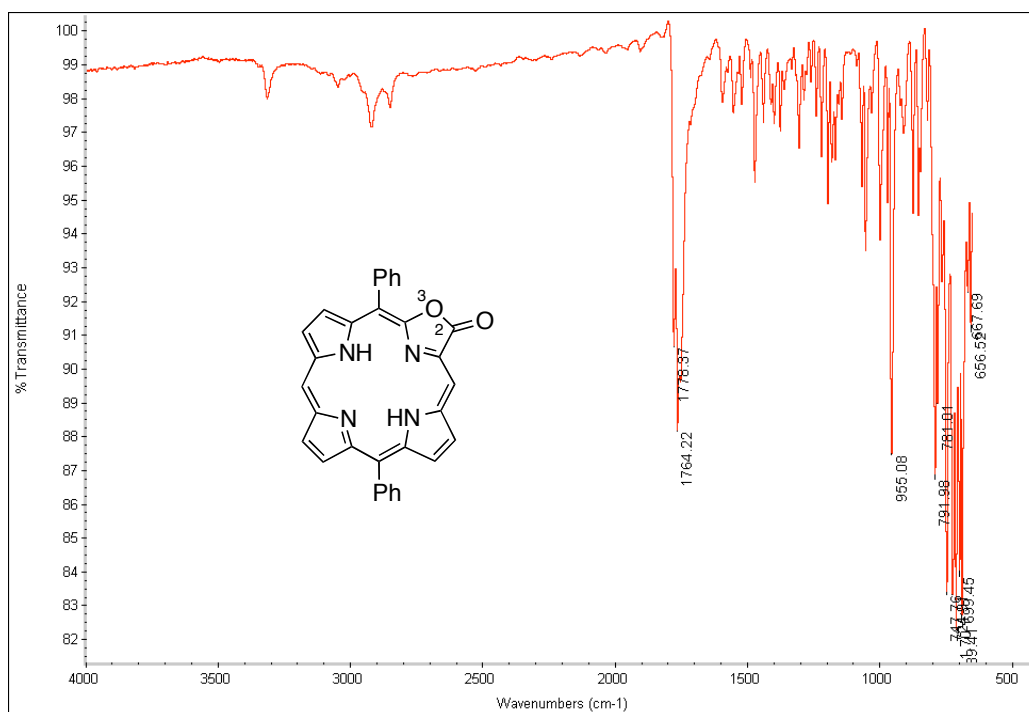

**Figure S61.** FT-IR spectrum (neat, diffuse reflectance) of **15-II-H<sub>2</sub>**

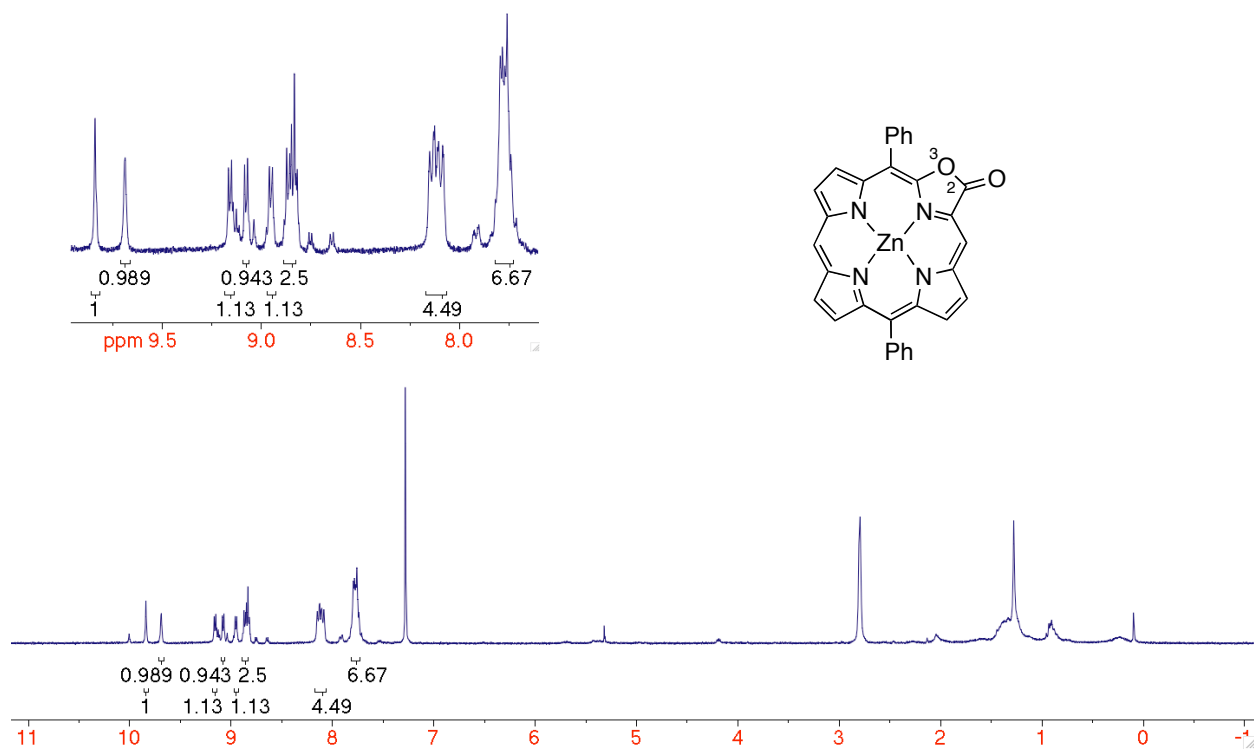

**Figure S62.**  $^1\text{H}$  NMR (300 MHz,  $\text{CDCl}_3$ ) of **15-II-Zn**.

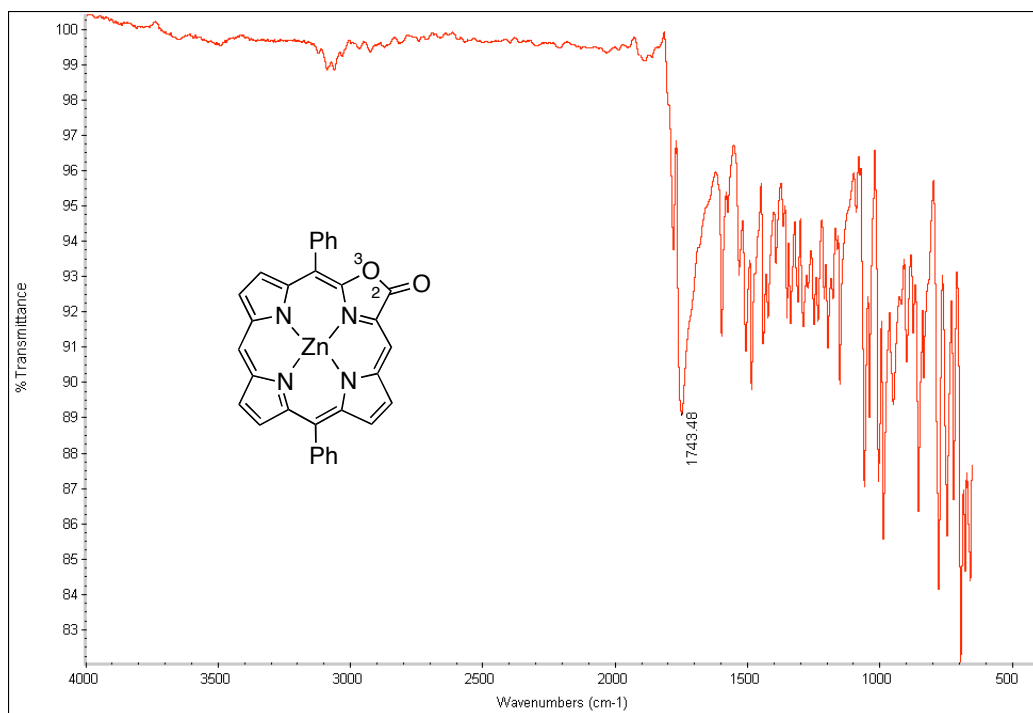

**Figure S63.** FT-IR spectrum (neat, diffuse reflectance) of **15-II-Zn**.

## DETAILS OF THE SINGLE CRYSTAL X-RAY DIFFRACTOMETRY STUDIES

**Table S1.** Crystallographic data and structure refinement for **5aH<sub>2</sub>**.

|                                     |                                                                                                       |
|-------------------------------------|-------------------------------------------------------------------------------------------------------|
| Identification code:                | 06mz049m                                                                                              |
| Empirical formula:                  | C <sub>43</sub> H <sub>28</sub> N <sub>4</sub> O <sub>2</sub>                                         |
| Formula weight:                     | 632.69                                                                                                |
| Temperature:                        | 100(2) K                                                                                              |
| Wavelength:                         | 0.71073 Å                                                                                             |
| Crystal system:                     | Triclinic                                                                                             |
| Space group:                        | P-1                                                                                                   |
| Unit cell dimensions:               | a = 6.3491(4) Å, α = 94.1750(10)°<br>b = 10.3930(6) Å, β = 100.3440(10)°<br>c = 12.2632(7) Å, γ = 90° |
| Volume, Z:                          | 778.20(8) Å <sup>3</sup> , 1                                                                          |
| Density (calculated):               | 1.350 Mg/m <sup>3</sup>                                                                               |
| Absorption coefficient:             | 0.084 mm <sup>-1</sup>                                                                                |
| F(000):                             | 330                                                                                                   |
| Crystal size:                       | 0.46 × 0.40 × 0.18 mm                                                                                 |
| Crystal shape, colour:              | block, black                                                                                          |
| θ range for data collection:        | 1.70 to 28.28°                                                                                        |
| Limiting indices:                   | -8 h ≤ 8, -13 ≤ k ≤ 13 -16 ≤ l ≤ 16                                                                   |
| Reflections collected:              | 7972                                                                                                  |
| Independent reflections:            | 3842 (R(int) = 0.0187)                                                                                |
| Completeness to θ = 28.28°:         | 99.4 %                                                                                                |
| Absorption correction:              | multi-scan                                                                                            |
| Max. and min. transmission:         | 0.985 and 0.907                                                                                       |
| Refinement method:                  | Full-matrix least-squares on F <sup>2</sup>                                                           |
| Data / restraints / parameters:     | 3842 / 45 / 238                                                                                       |
| Goodness-of-fit on F <sup>2</sup> : | 1.157                                                                                                 |
| Final R indices [I > 2σ(I)]:        | R1 = 0.0565, wR2 = 0.1378                                                                             |
| R indices (all data):               | R1 = 0.0581, wR2 = 0.1389                                                                             |
| Largest diff. peak and hole:        | 0.323 and -0.216 e × Å <sup>-3</sup>                                                                  |



Refinement of  $F^2$  against ALL reflections. The weighted R-factor wR and goodness of fit are based on  $F^2$ , conventional R-factors R are based on  $F$ , with  $F$  set to zero for negative  $F^2$ . The threshold expression of  $F^2 > 2\sigma(F^2)$  is used only for calculating R-factors

### Comments:

The free base lactone **5aH<sub>2</sub>** molecule (code 06mz049m) is located on an inversion center and the lactone moiety is disordered with the pyrrol units over three different positions. Two of the three are disordered with one of the two pyrrols (flip disordered with respect to themselves), and the third position is disordered with the second pyrrol. Occupancy restraints were applied as follows:

1. All pyrrol occupancies were restraint to sum up to 1.5 (half of 3 since molecule is located on an inversion center). The sum of the lactone occupancies was restrained to 0.5. For the pyrrol unit disordered with only one lactone moiety the occupancies of both were restrained to sum up to 1. The occupancies for the first site refined to 0.573(2) for the pyrrol, and 0.266(3) and 0.157(3) for the two lactone moieties. The occupancies for the second site refined to 0.927(2) for the pyrrol and 0.077(2) for the lactone.
2. For the disordered parts of the molecule additional restraints were applied. The two pyrrol and the three lactone units were restrained to have the same geometries within a standard deviation of 0.02 Å. The pyrrol units were restraint to be flat within a standard deviation of 0.1 Å<sup>2</sup>. For the lactone equivalent 1,3 distances within the rings were restrained to be identical within a standard deviation of 0.02 Å, as were the keto C=O bond lengths. All anisotropic displacement parameters within the disordered parts of the rings were restrained to be identical and isotropic (within a standard deviation of 0.01). All anisotropic displacement parameters of the keto oxygen atoms were restrained to be identical.

One keto oxygen atom of one of the lactone units (that with the 15.9% occupancy) is forced into a close contact with an aromatic carbon atom of a neighboring molecule, which forces this lactone moiety out of the plane of the porpholactone molecule. The distance between the keto oxygen atom O3 and the carbon atom C14<sup>i</sup> is 2.910(7) Å (symmetry operator (i) 2-x, 1-y, -z).

Treatment of hydrogen atoms:

All hydrogen atoms were located in the difference density Fourier map and were isotropically refined with a displacement parameter 1.2 times that of the adjacent carbon atom. The occupancy ratio for the two pyrrole hydrogen atoms was refined to 0.266(4) to 0.734(3).

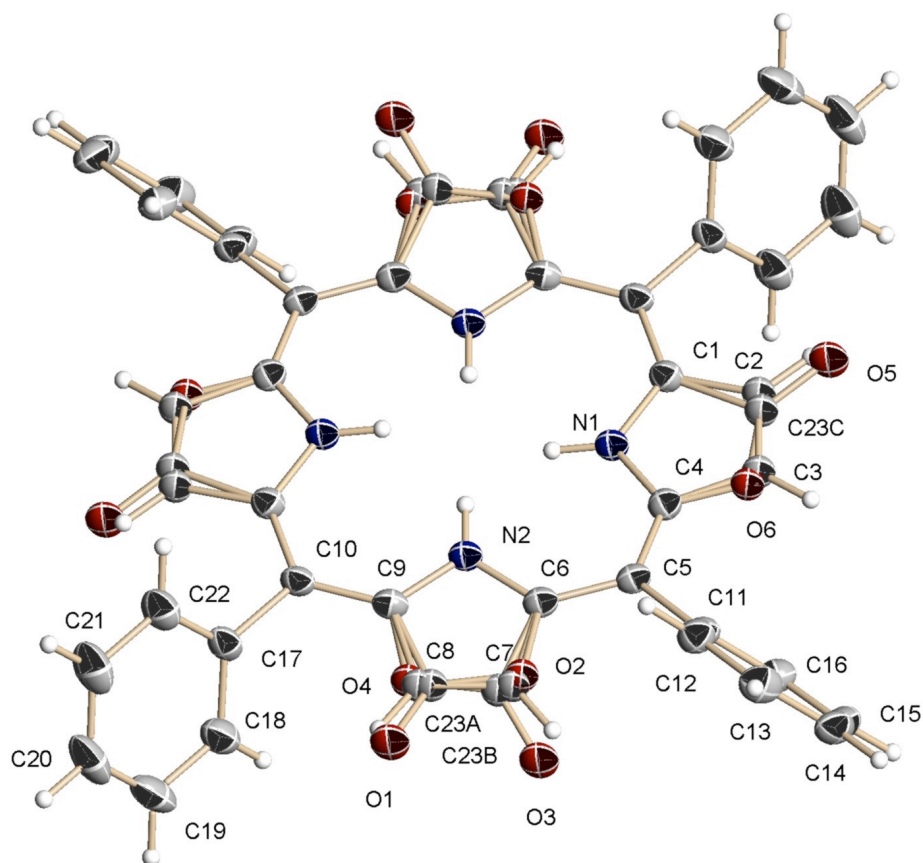

**Figure S64.** ORTEP representation and numbering scheme used in the crystal structure of **5aH<sub>2</sub>**.

**Table S2.** Crystallographic data and structure refinement for **5aZn**.

Crystal shape: rod (black). Experiments were carried out at 100 K with Mo  $K\alpha$  radiation using a Bruker AXS SMART APEX CCD diffractometer. Data collection used  $\omega$  scans. Absorption was corrected for by multi-scan methods, Apex2 v2009.7-0 (Bruker, 2009). H-atom parameters were constrained.

## Crystal data

|                                                                            |                                                                          |
|----------------------------------------------------------------------------|--------------------------------------------------------------------------|
| Chemical formula                                                           | $C_{48}H_{31}N_5O_2Zn$                                                   |
| $M_r$                                                                      | 775.19                                                                   |
| Identification code                                                        | JA-B-152_09mz431                                                         |
| Crystal system, space group                                                | Monoclinic, $C2/c$                                                       |
| $a, b, c$ (Å)                                                              | 14.863 (9), 17.010 (11), 14.667 (9)                                      |
| $\alpha, \beta, \gamma$ (°)                                                | 90, 93.844 (10), 90                                                      |
| $V$ (Å <sup>3</sup> )                                                      | 3700 (4)                                                                 |
| $Z$                                                                        | 4                                                                        |
| $F(000)$                                                                   | 1600                                                                     |
| $D_x$ (Mg m <sup>-3</sup> )                                                | 1.392                                                                    |
| $\mu$ (mm <sup>-1</sup> )                                                  | 0.71                                                                     |
| Crystal size (mm)                                                          | 0.55 × 0.20 × 0.10                                                       |
| Data collection                                                            |                                                                          |
| Radiation source                                                           | fine-focus sealed tube                                                   |
| Monochromator                                                              | graphite                                                                 |
| $T_{min}, T_{max}$                                                         | 0.462, 0.746                                                             |
| No. of measured, independent and observed [ $I > 2\sigma(I)$ ] reflections | 12911, 3385, 2252                                                        |
| $R_{int}$                                                                  | 0.066                                                                    |
| $\theta$ values (°)                                                        | $\theta_{max} = 25.4, \theta_{min} = 1.8$                                |
| Range of $h, k, l$                                                         | $h = -17 \rightarrow 17, k = -20 \rightarrow 20, l = -17 \rightarrow 16$ |
| Refinement                                                                 |                                                                          |
| $R[F^2 > 2\sigma(F^2)], wR(F^2), S$                                        | 0.092, 0.213, 1.17                                                       |
| No. of reflections                                                         | 3385                                                                     |
| No. of parameters                                                          | 486                                                                      |
| No. of restraints                                                          | 845                                                                      |
| $\Delta_{max}, \Delta_{min}$ (e Å <sup>-3</sup> )                          | 0.78, -0.65                                                              |

Computer programs: Bruker Advanced X-ray Solutions SMART for WNT/2000 (Version5.628),

Bruker AXS Inc., Madison, WI, USA, 1997–2002. Apex2 v2009.7-0 (Bruker, 2009), Apex2 v2009.7-0, *SHELXTL* 6.14 (Bruker, 2000-2003; Sheldrick, 2008), *SHELXTL* 6.14.

## Comments

The molecule **5aZn** as a whole is disordered over two positions related by a two fold axis running through the pyridine ligand and close to the Zn ion. In addition the pyridine ligand is disordered over two positions in a refined ratio of 0.60(2) to 0.40(2). The lactone unit is in addition flip disordered with an occupancy ratio of 0.62(2) to 0.38(2). Due to the proximity of the disordered atoms restraints and constraints needed to be applied to achieve a meaningful refinement. The two halves of the molecule related by pseudo two fold symmetry were restrained to have similar geometries (not including the phenyl rings). The phenyl and pyridyl rings were constrained to resemble ideal hexagons with C-C and C-N distances of 1.39 Å. All atoms were restrained to have ADPs similar to those of their neighbors using the SIMU and DELU restraints from Shelxtl (standard deviation 0.03). Atoms N3 and N3b were in addition constrained to have identical ADPs.

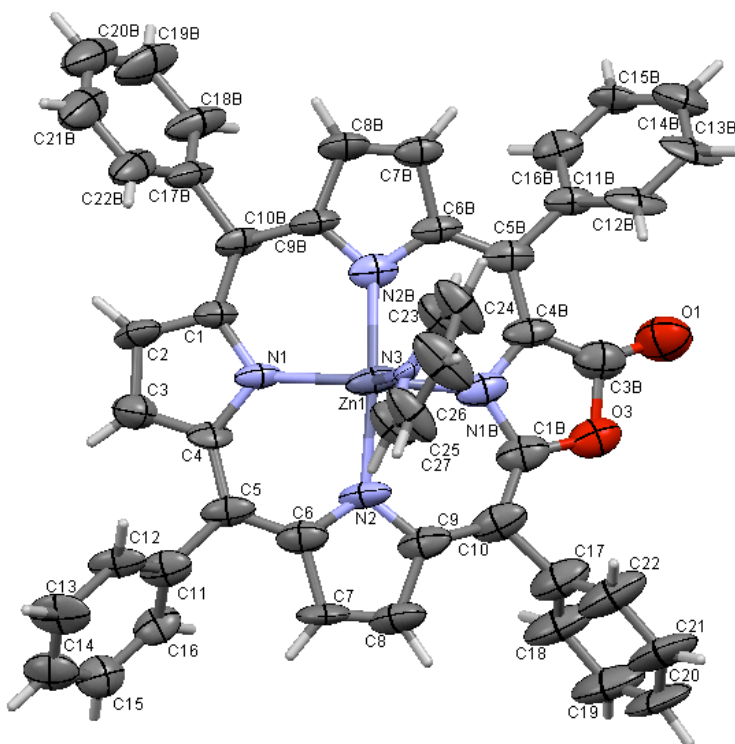

**Figure S65.** ORTEP representation and numbering scheme used in the crystal structure of **5aZn·py**. The second symmetry equivalent moiety created by the two fold axis and disorder of the pyridine and lactone units are omitted for clarity.

**Table S3.** Crystallographic data and structure refinement for **12aH<sub>2</sub>**.

Crystal shape: rod (black). Experiments were carried out at 100 K with Mo  $K\alpha$  radiation using a Bruker AXS SMART APEX CCD diffractometer. Data collection used  $\omega$  scans. Absorption was corrected for by multi-scan methods, Apex2 v2009.7-0 (Bruker, 2009). H-atom parameters were constrained.

## Crystal data

|                                                                            |                                                                        |
|----------------------------------------------------------------------------|------------------------------------------------------------------------|
| Chemical formula                                                           | C <sub>43</sub> H <sub>30</sub> N <sub>4</sub> O                       |
| Identification Code                                                        | JA-D-89-F1_oxazole_10mz584                                             |
| $M_r$                                                                      | 618.71                                                                 |
| Crystal system, space group                                                | Triclinic, $P\bar{1}$                                                  |
| $a, b, c$ (Å)                                                              | 6.3603 (17), 10.378 (3), 12.263 (3)                                    |
| $\alpha, \beta, \gamma$ (°)                                                | 94.826 (4), 99.465 (4), 101.113 (4)                                    |
| $V$ (Å <sup>3</sup> )                                                      | 777.8 (4)                                                              |
| $Z$                                                                        | 1                                                                      |
| $F(000)$                                                                   | 324                                                                    |
| $D_x$ (Mg m <sup>-3</sup> )                                                | 1.321                                                                  |
| $\mu$ (mm <sup>-1</sup> )                                                  | 0.08                                                                   |
| Crystal size (mm)                                                          | 0.55 × 0.20 × 0.12                                                     |
| Data collection                                                            |                                                                        |
| Radiation source                                                           | fine-focus sealed tube                                                 |
| Monochromator                                                              | graphite                                                               |
| $T_{\min}, T_{\max}$                                                       | 0.692, 0.746                                                           |
| No. of measured, independent and observed [ $I > 2\sigma(I)$ ] reflections | 11715, 3817, 2995                                                      |
| $R_{\text{int}}$                                                           | 0.028                                                                  |
| $\theta$ values (°)                                                        | $\theta_{\text{max}} = 28.3, \theta_{\text{min}} = 2.0$                |
| Range of $h, k, l$                                                         | $h = -8 \rightarrow 8, k = -13 \rightarrow 13, l = -16 \rightarrow 16$ |

## Refinement

|                                                                                                                                                    |                    |
|----------------------------------------------------------------------------------------------------------------------------------------------------|--------------------|
| $R[F^2 > 2\sigma(F^2)], wR(F^2), S$                                                                                                                | 0.045, 0.120, 1.06 |
| No. of reflections                                                                                                                                 | 3817               |
| No. of parameters                                                                                                                                  | 223                |
| No. of restraints                                                                                                                                  | 0                  |
| $\Delta_{\text{max}}, \Delta_{\text{min}}$ (e Å <sup>-3</sup> )                                                                                    | 0.35, -0.20        |
| Computer programs: Apex2 v2009.7-0 (Bruker, 2009), Apex2 v2009.7-0, <i>SHELXTL</i> 6.14 (Bruker, 2000-2003; Sheldrick, 2008), <i>SHELXTL</i> 6.14. |                    |

## Comments:

The oxazole unit was refined as disordered with the pyrrole units in a three to one ratio, with the oxazole ring in all four possible positions and orientations. The oxazole occupancies refined to 0.115(5), 0.084(5), 0.190(3) and 0.110(4) for the four crystallographically independent positions. To accomplish refinement the positions of minor C and O atoms were constrained to be the same as those of the major atom at the same site. No attempts were made to refine the geometry of the oxazole units.

Refinement of the structure as the parent compound tetraphenyl porphyrin gave a slightly higher R values:

R1 = 0.0496 for 2995  $F_o > 4\text{sig}(F_o)$  and 0.0643 for all 3817 data

wR2 = 0.1380, GooF = S = 1.093, Restrained GooF = 1.093 for all data

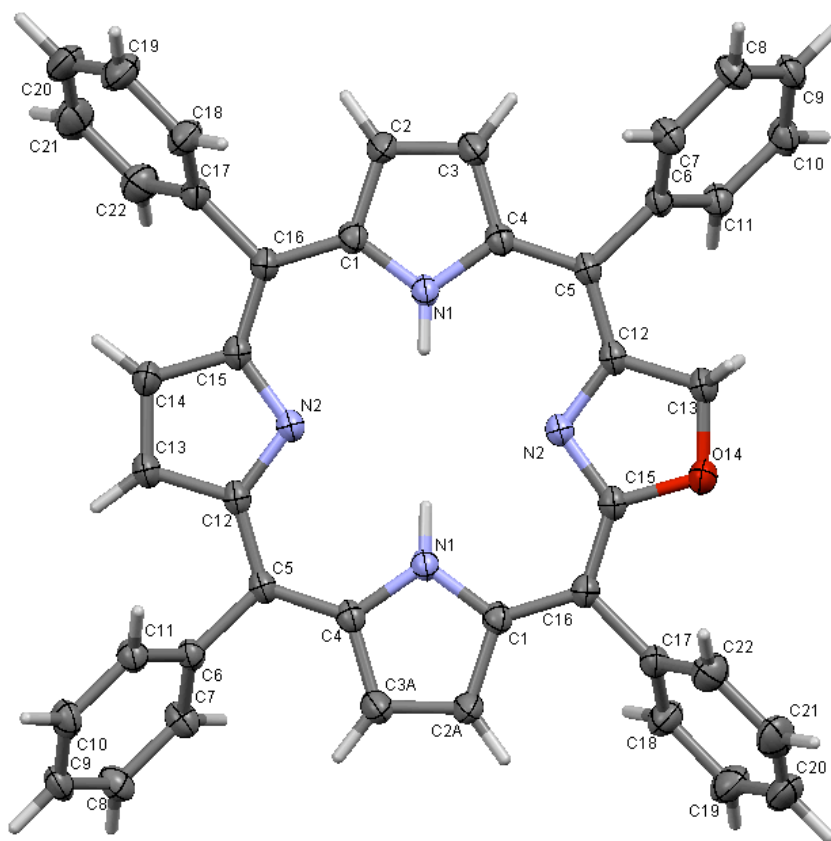

**Figure S66.** ORTEP representation and numbering scheme used in the crystal structure of **12aH<sub>2</sub>**. Only the major of the of four realized positions and orientations of the oxazole unit is shown for clarity.

**Table S4.** Crystallographic data for **15-II-Zn·py**.

|                                                                                                                         |                                                                                             |
|-------------------------------------------------------------------------------------------------------------------------|---------------------------------------------------------------------------------------------|
| Chemical formula                                                                                                        | C <sub>36</sub> H <sub>23</sub> N <sub>5</sub> O <sub>2</sub> Zn                            |
| <i>M<sub>r</sub></i>                                                                                                    | 622.96                                                                                      |
| Cell setting, space group                                                                                               | Triclinic, <i>P</i> $\bar{1}$                                                               |
| Temperature (K)                                                                                                         | 100 (2)                                                                                     |
| <i>a</i> , <i>b</i> , <i>c</i> (Å)                                                                                      | 10.4629(19), 13.445(2), 20.798(4)                                                           |
| $\alpha$ , $\beta$ , $\gamma$ (°)                                                                                       | 91.532(3), 91.461(3), 108.916(3)                                                            |
| <i>V</i> (Å <sup>3</sup> )                                                                                              | 2764.9(9)                                                                                   |
| <i>Z</i>                                                                                                                | 4                                                                                           |
| <i>D<sub>x</sub></i> (Mg m <sup>-3</sup> )                                                                              | 1.494                                                                                       |
| Radiation type                                                                                                          | Mo <i>K</i> $\alpha$                                                                        |
| $\mu$ (mm <sup>-1</sup> )                                                                                               | 0.933                                                                                       |
| Crystal form, colour                                                                                                    | block, dark green                                                                           |
| Crystal size (mm)                                                                                                       | 0.20 × 0.20 × 0.10                                                                          |
| Diffractometer                                                                                                          | CCD area detector                                                                           |
| Data collection method                                                                                                  | phi and $\omega$ scans                                                                      |
| Absorption correction                                                                                                   | Multi-scan                                                                                  |
| <i>T<sub>min</sub></i>                                                                                                  | 0.3844                                                                                      |
| <i>T<sub>max</sub></i>                                                                                                  | 0.9124                                                                                      |
| No. of measured, independent and observed reflections                                                                   | 23458, 12485, 10192                                                                         |
| Criterion for observed reflections                                                                                      | <i>I</i> > 2 $\sigma$ ( <i>I</i> )                                                          |
| <i>R<sub>int</sub></i>                                                                                                  | 0.0250                                                                                      |
| $\theta_{\max}$ (°)                                                                                                     | 28.40                                                                                       |
| Refinement                                                                                                              |                                                                                             |
| Refinement on                                                                                                           | <i>F</i> <sup>2</sup>                                                                       |
| <i>R</i> [ <i>F</i> <sup>2</sup> > 2 $\sigma$ ( <i>F</i> <sup>2</sup> )], <i>wR</i> ( <i>F</i> <sup>2</sup> ), <i>S</i> | 0.0404, 0.1137, 0.1096                                                                      |
| No. of relections                                                                                                       | 12485 reflections                                                                           |
| No. of parameters                                                                                                       | 826                                                                                         |
| No. of restraints                                                                                                       | 0                                                                                           |
| H-atom treatment                                                                                                        | Constrained to parent site                                                                  |
| Weighting scheme                                                                                                        | Calculated $w = 1/[\sigma^2(F_o^2) + (0.0617P)^2 + 0.7753P]$ where $P = (F_o^2 + 2F_c^2)/3$ |
| ( $\Delta/\sigma$ ) <sub>max</sub>                                                                                      | <0.01                                                                                       |
| $\Delta\rho_{\max}$ , $\Delta\rho_{\min}$ (e Å <sup>-3</sup> )                                                          | 1.199, -0.525                                                                               |

**Comments:**

Purple crystals of **15-II-Zn·py** were grown by diffusion of MeOH into a CH<sub>2</sub>Cl<sub>2</sub> solution of the complex. A 0.10 x 0.20 x 0.20 crystal was mounted and X-ray intensity data were measured at 100 K (Bruker KYRO-FLEX) on a Bruker SMART APEX CCD-based X-ray diffractometer system equipped with a Mo-target X-ray tube ( $\lambda = 0.71073 \text{ \AA}$ ) operated at 2000 W power. The crystals were mounted on a cryoloop using Paratone N-Exxon oil and placed under a stream of nitrogen at 100 K. The detector was placed at a distance of 5.009 cm from the crystals. The data were corrected for absorption with the SADABS program. The structures were refined using the Bruker SHELXTL Software Package (Version 6.1), and were solved using direct methods until the final anisotropic full-matrix, least squares refinement of  $F^2$  converged.

In the solid state structure of compound **15-II-Zn·py**, there are two molecules of Zn(DPPL)py per asymmetric unit. The orientation of the oxazolone ring is disordered in this compound, however the disorder manifests itself in different ways in each of the equivalents of Zn(DPPL)py in the asymmetric unit. In one of the two porpholactones, the disorder is primarily between cis positions on the ring, whereas in the second equivalent the disorder is along trans oxazolone positions. For all disordered moieties the overlapping C and O atoms were constrained to have identical ADPs. In the cis disorder, the occupancy was refined to 0.548(5) and 0.452(5) for the two positions, while in the trans disorder, the occupancy was refined to 0.715(5) and 0.285(5) for the two orientations. In both cases, the acyl group of the oxazolone ring is oriented away from the meso phenyl groups, and as such the oxygen atoms do not encounter any steric interactions and do not deviate from the plane of the porphyrinoid macrocycle. Residual electron density indicates additional disorder (the three largest Q peaks agree with possible alternative positions of oxazole keto oxygen atoms).

The Zn(II) ions are five coordinate with the equatorial positions occupied by the dianionic porpholactone ring, and the axial position occupied by pyridines. The equatorial Zn-N bonds range from 2.0499(19) to 2.0832(19) Å, while the axial Zn-N bonds are longer, with values of 2.1430(18) and 2.1587(18)Å. The zinc ion in each complex is pulled out of the plane of the porpholactone by 0.329 and 0.325 Å as measured by the distance of the metal to the plane defined by the four nitrogen atoms of the macrocycle.

Hydrogen atoms were assigned in ideal positions as riding atoms and refined isotropically.



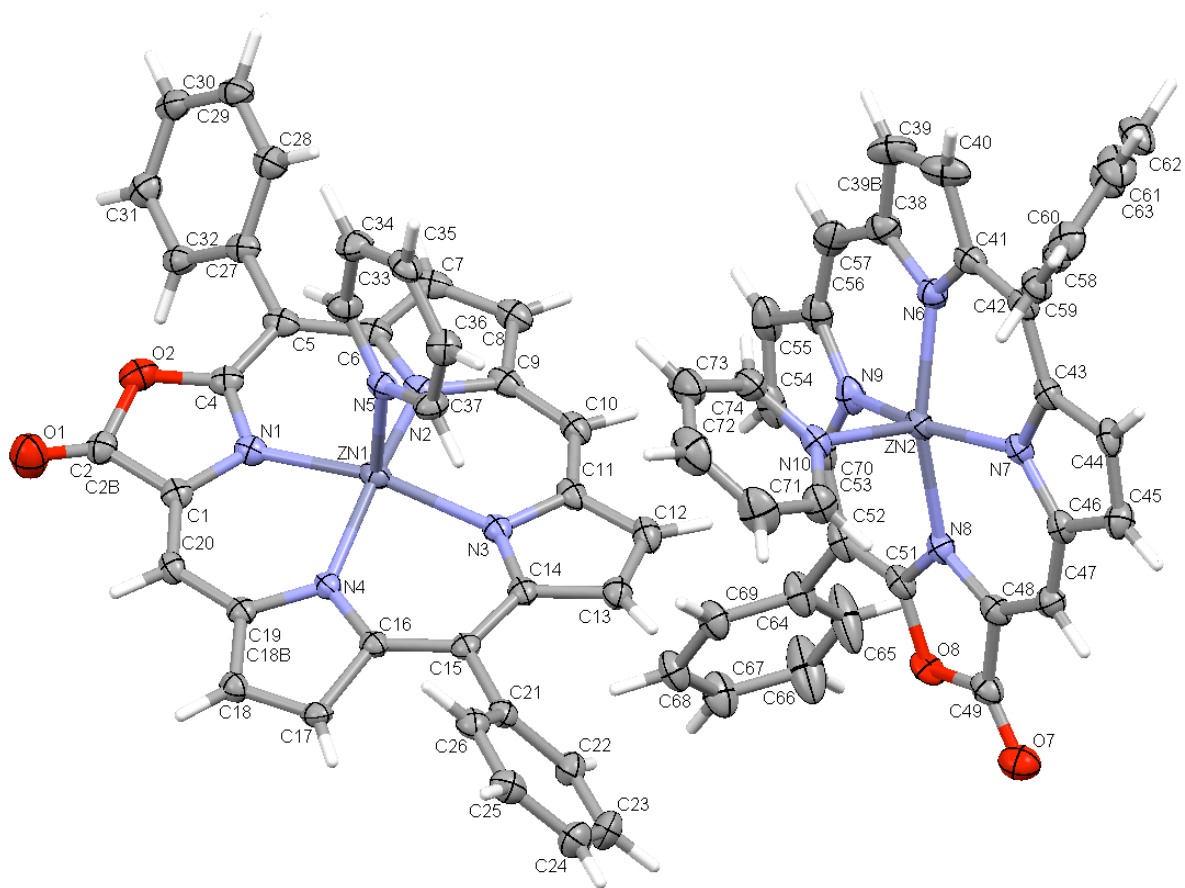

**Figure S67.** ORTEP representation and numbering scheme used in the crystal structure of **15-II-Zn·py**. Minor disordered moieties are omitted for clarity.

**Table S5.** Crystallographic data for **13a-OMe**.

|                                                                                                                |                                                                                             |
|----------------------------------------------------------------------------------------------------------------|---------------------------------------------------------------------------------------------|
| Chemical formula                                                                                               | C <sub>44</sub> H <sub>33</sub> N <sub>4</sub> O <sub>2.5</sub>                             |
| <i>M<sub>r</sub></i>                                                                                           | 657.74                                                                                      |
| Cell setting, space group                                                                                      | Tetragonal, <i>I4/m</i>                                                                     |
| Temperature (K)                                                                                                | 100 (2)                                                                                     |
| <i>a</i> , <i>b</i> , <i>c</i> (Å)                                                                             | 13.460(3), 13.460(3), 9.7678(18)                                                            |
| α, β, γ (°)                                                                                                    | 90, 90, 90                                                                                  |
| <i>V</i> (Å <sup>3</sup> )                                                                                     | 1769.6(6)                                                                                   |
| <i>Z</i>                                                                                                       | 2                                                                                           |
| <i>D<sub>x</sub></i> (Mg m <sup>-3</sup> )                                                                     | 1.234                                                                                       |
| Radiation type                                                                                                 | Mo <i>K</i> α                                                                               |
| μ (mm <sup>-1</sup> )                                                                                          | 0.078                                                                                       |
| Crystal form, colour                                                                                           | block, yellow                                                                               |
| Crystal size (mm)                                                                                              | 0.38 × 0.22 × 0.18                                                                          |
| Diffractometer                                                                                                 | Bruker ApexII CCD area detector                                                             |
| Data collection method                                                                                         | phi and ω scans                                                                             |
| Absorption correction                                                                                          | Multi-scan                                                                                  |
| <i>T<sub>min</sub></i>                                                                                         | 0.6620                                                                                      |
| <i>T<sub>max</sub></i>                                                                                         | 0.7455                                                                                      |
| No. of measured, independent and observed reflections                                                          | 7481, 1046, 832                                                                             |
| Criterion for observed reflections                                                                             | <i>I</i> > 2σ( <i>I</i> )                                                                   |
| <i>R<sub>int</sub></i>                                                                                         | 0.0268                                                                                      |
| θ <sub>max</sub> (°)                                                                                           | 27.12                                                                                       |
| Refinement                                                                                                     |                                                                                             |
| Refinement on                                                                                                  | <i>F</i> <sup>2</sup>                                                                       |
| <i>R</i> [ <i>F</i> <sup>2</sup> > 2σ( <i>F</i> <sup>2</sup> )], <i>wR</i> ( <i>F</i> <sup>2</sup> ), <i>S</i> | 0.0531, 0.1651, 0.1530                                                                      |
| No. of relections                                                                                              | 1046 reflections                                                                            |
| No. of parameters                                                                                              | 95                                                                                          |
| No. of restraints                                                                                              | 1                                                                                           |
| H-atom treatment                                                                                               | Constrained to parent site                                                                  |
| Weighting scheme                                                                                               | Calculated $w = 1/[\sigma^2(F_o^2) + (0.0901P)^2 + 0.8333P]$ where $P = (F_o^2 + 2F_c^2)/3$ |
| (Δ/σ) <sub>max</sub>                                                                                           | <0.01                                                                                       |
| Δρ <sub>max</sub> , Δρ <sub>min</sub> (e Å <sup>-3</sup> )                                                     | 0.309, -0.182                                                                               |

### Comments:

The oxazole unit is disordered with the pyrrole units in a 3:1 ratio. In addition the methoxy group is disordered over two alternative positions above or below the plane of the macrocycle. The methoxy groups of neighboring molecules are disordered around a four fold rotoinversion axis with a combined site occupancy of 0.5. The remainder of the site is taken up by a half occupied water molecule (located directly on the four fold rotoinversion axis).

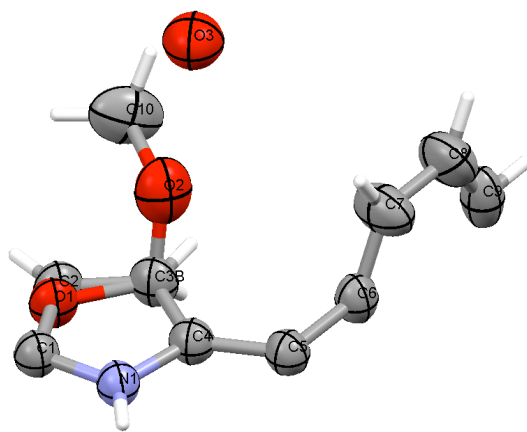

**Figure S68.** ORTEP representation and numbering scheme of the asymmetric unit of the crystal structure of **13a-OMe**.

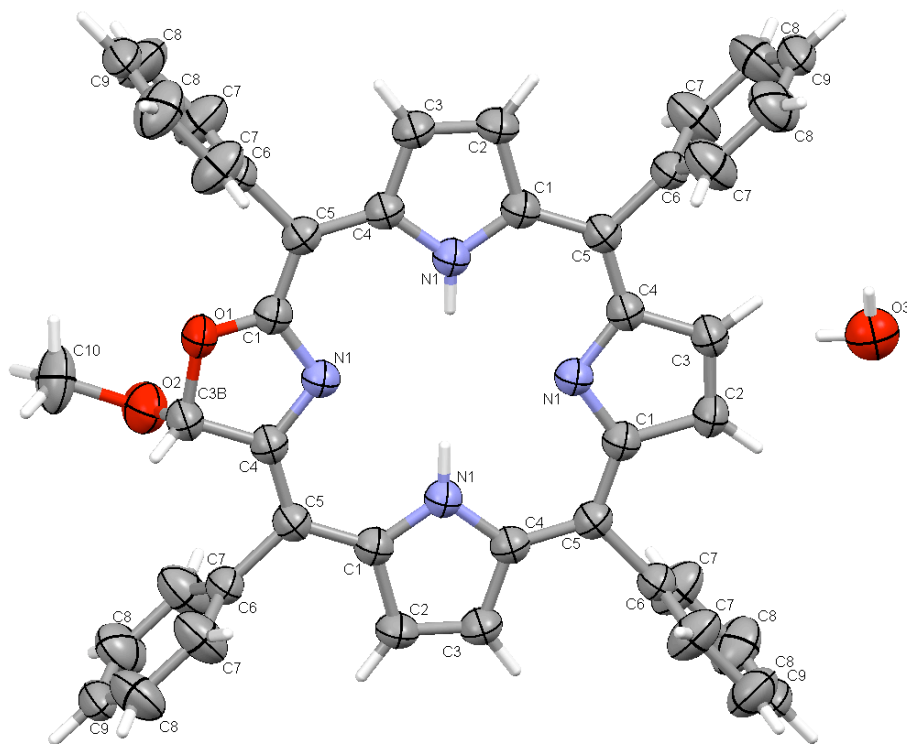

**Figure S69.** ORTEP representation and numbering scheme of the crystal structure of **13a-OMe**; Only one of the possible eight positions and orientations of the oxazole unit is shown for clarity.

## DETAILS TO THE COMPUTATIONS

**Table S2.** Ratios of the oscillator strength of the  $Q_x$  band divided by the oscillator strength of the Soret band as a function of solvent and comparison to computed ratios.

|                                 | $\left( \frac{\int(Q_x)}{\int(Q_{Soret})} \right) \times 10^4$ |                        |                        |                         |                         |
|---------------------------------|----------------------------------------------------------------|------------------------|------------------------|-------------------------|-------------------------|
| <b>Solvent</b>                  | <b>1aH<sub>2</sub></b>                                         | <b>5aH<sub>2</sub></b> | <b>7aH<sub>2</sub></b> | <b>10aH<sub>2</sub></b> | <b>12aH<sub>2</sub></b> |
| CHCl <sub>3</sub>               | 112                                                            | 61                     | 256                    | 342                     | 513                     |
| CH <sub>2</sub> Cl <sub>2</sub> | 108                                                            | 54                     | 218                    | 333                     | 522                     |
| DMSO                            | 104                                                            | 85                     | 231                    | 348                     | 515                     |
| Hexane                          | 86                                                             | 81                     | 253                    | 356                     | 547                     |
| Acetone                         | 78                                                             | 71                     | 219                    | 334                     | 490                     |
| EtOAc                           | 76                                                             | 68                     | 223                    | 354                     | 492                     |
| MeCN                            | 75                                                             | 64                     | 214                    | 330                     | 493                     |
| MeOH                            | 75                                                             | 65                     | 208                    | 334                     | 465                     |
| THF                             | 71                                                             | 70                     | 230                    | 362                     | 530                     |
| Pyridine                        | 64                                                             | 64                     | 232                    | 374                     | 451                     |
| Toluene                         | 58                                                             | 72                     | 250                    | 361                     | 474                     |
| Exp. Average <sup>a</sup>       | 82                                                             | 69                     | 230                    | 348                     | 499                     |
| SAC-Cl <sup>b</sup>             | 0                                                              | 120                    | 115                    | 303                     | 377                     |
| MNDOCl <sup>c</sup>             | 51                                                             | 21                     | 6                      | 28                      | 117                     |
| Dipole Moment (D) <sup>d</sup>  | 0.0000                                                         | 5.0056                 | 3.5992                 | 1.3018                  | 1.1781                  |
| Dipole Moment* (D) <sup>e</sup> | 0.0000                                                         | 4.7023                 | 0.8262                 | 1.2315                  | 1.3615                  |

<sup>a</sup> Average of the results obtained in 11 solvents (CHCl<sub>3</sub>, CH<sub>2</sub>Cl<sub>2</sub>, DMSO, *n*-hexane, acetone, EtOAc, MeCN, MeOH, THF, pyridine, toluene).

<sup>b</sup> From Figure 3 (left panel).

<sup>c</sup> From Figure 3 (right panel).

<sup>d</sup> B3LYP/6-31G(d) dipole moments computed without the phenyl rings.

<sup>e</sup> B3LYP/6-31G(d) dipole moments computed with the phenyl rings.

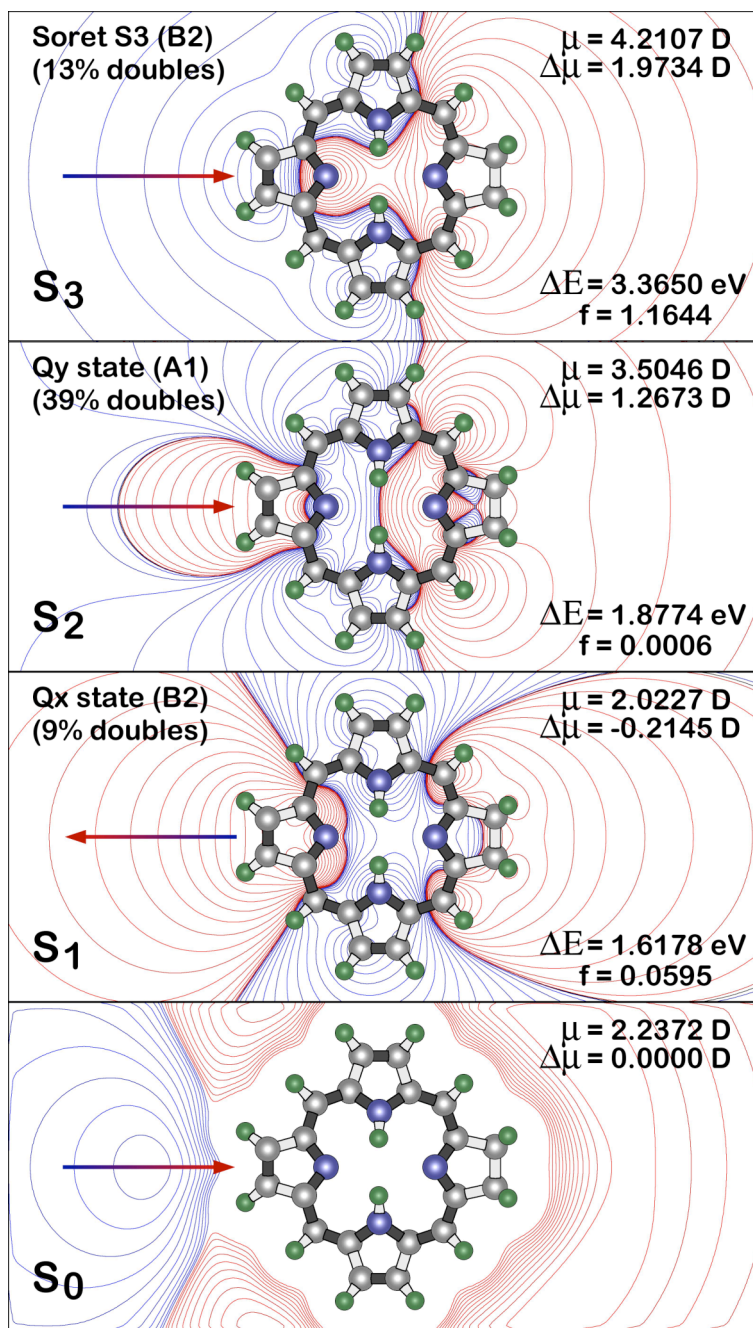

**Figure S70.** Ground and excited state charge behavior in chlorin ( $C_{2v}$ ) based on SAC-CI molecular orbital theory using a full double-zeta D95 basis set and level two integral selection (see theoretical section). The ground state charge distribution is shown in the bottom panel, and the arrow indicates the direction of the ground state dipole moment (2.24 D). The upper three panels show the shift in electronic charge upon excitation into the lowest energy singlet states, with the arrows showing the charge shift directions (red is positive and blue is negative).

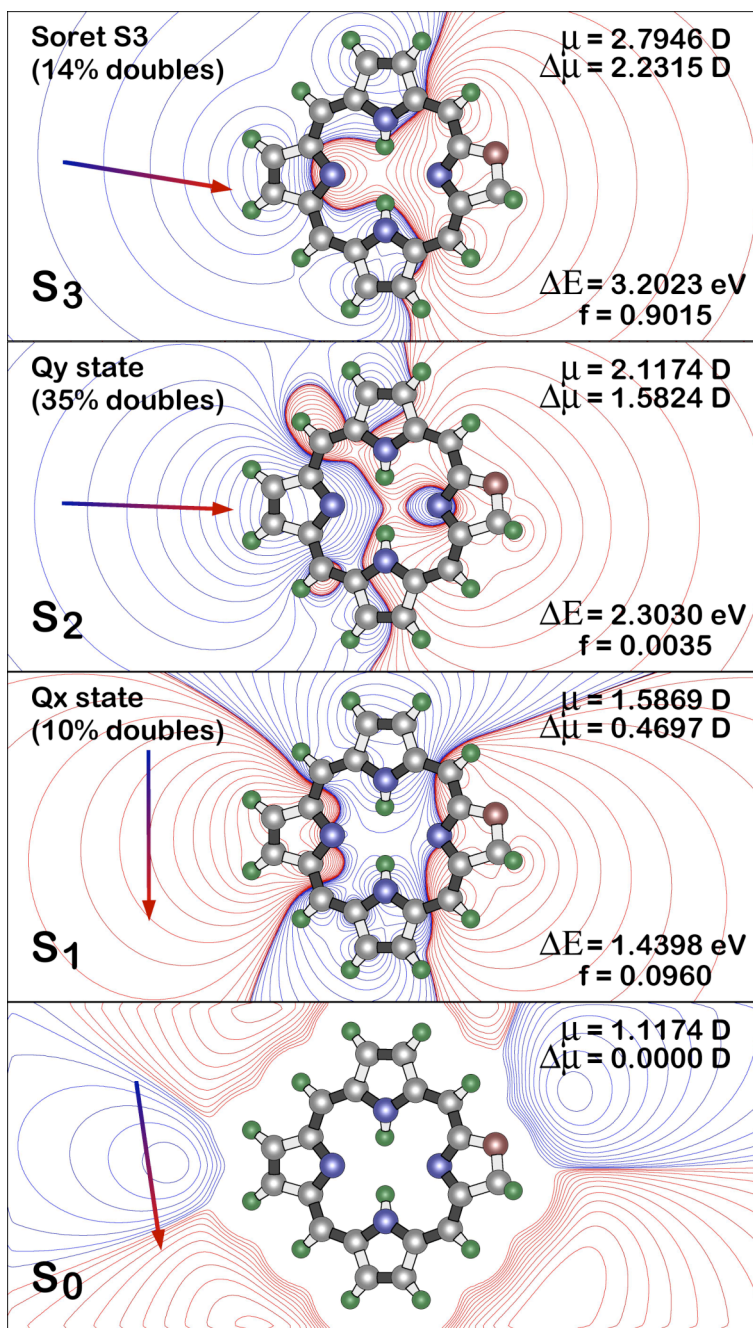

**Figure S71.** Ground and excited state charge behavior in **12aH<sub>2</sub>** based on SAC-CI molecular orbital theory using a full double-zeta D95 basis set and level two integral selection (see theoretical section). The ground state charge distribution is shown in the bottom panel, and the arrow indicates the direction of the ground state dipole moment (2.24 D). The upper three panels show the shift in electronic charge upon excitation into the lowest energy singlet states, with the arrows showing the charge shift directions (red is positive and blue is negative).

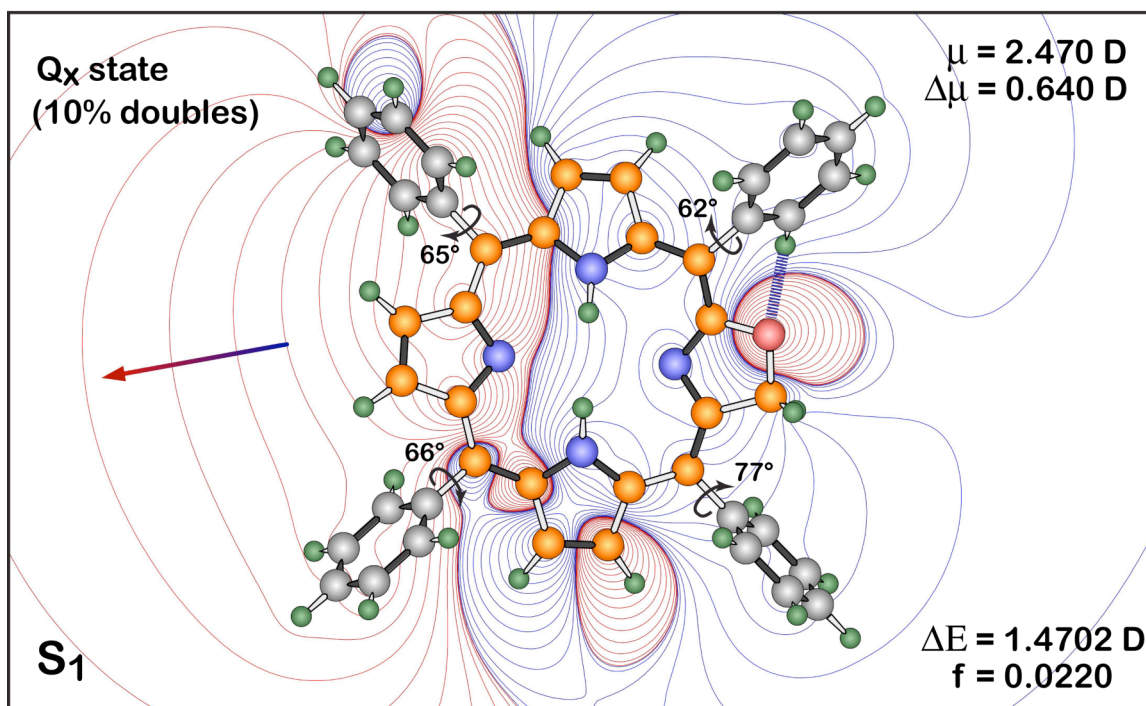

**Figure S72.** Charge shifts upon excitation into the lowest-lying  $Q_x$  state of  $12aH_2$  based on MNDO-PSDCI molecular orbital theory. The charge shift vector is shown at middle left. A key interaction involving the hydrogen atom off the phenyl group and the oxygen atom in the macrocycle is shown with the dashed blue line. The two atoms are separated by  $2.8 \text{ \AA}$  and form a weak hydrogen bond that stabilizes the phenyl group and enhances the negative charge on the oxygen atom upon excitation.

COMPUTATIONS: TABLES OF ATOM COORDINATES AND ABSOLUTE ENERGIES

Table S7. Ground State Coordinates of porphyrin 1aH<sub>2</sub><sup>(a)</sup> w/o Ph

| Atom | X (Å)    | Y (Å)     | Z (Å)     | Charge    |
|------|----------|-----------|-----------|-----------|
| C 1  | 0.000000 | 4.239505  | 0.669450  | -0.231406 |
| C 2  | 0.000000 | 4.239505  | -0.669450 | -0.231406 |
| C 3  | 0.000000 | 2.838607  | -1.072824 | 0.328928  |
| C 4  | 0.000000 | 2.424271  | -2.400498 | -0.303197 |
| C 5  | 0.000000 | 1.119161  | -2.859251 | 0.383216  |
| C 6  | 0.000000 | 0.678048  | -4.219123 | -0.238680 |
| C 7  | 0.000000 | -0.678048 | -4.219123 | -0.238680 |
| C 8  | 0.000000 | -1.119161 | -2.859251 | 0.383216  |
| C 9  | 0.000000 | -2.424271 | -2.400498 | -0.303197 |
| C10  | 0.000000 | -2.838607 | -1.072824 | 0.328928  |
| C11  | 0.000000 | -4.239505 | -0.669450 | -0.231406 |
| C12  | 0.000000 | -4.239505 | 0.669450  | -0.231406 |
| C13  | 0.000000 | -2.838607 | 1.072824  | 0.328928  |
| C14  | 0.000000 | -2.424271 | 2.400498  | -0.303197 |
| C15  | 0.000000 | -1.119161 | 2.859251  | 0.383216  |
| C16  | 0.000000 | -0.678048 | 4.219123  | -0.238680 |
| C17  | 0.000000 | 0.678048  | 4.219123  | -0.238680 |
| C18  | 0.000000 | 1.119161  | 2.859251  | 0.383216  |
| C19  | 0.000000 | 2.424271  | 2.400498  | -0.303197 |
| C20  | 0.000000 | 2.838607  | 1.072824  | 0.328928  |
| N21  | 0.000000 | 2.034506  | 0.000000  | -0.776446 |
| N22  | 0.000000 | 0.000000  | -2.092880 | -0.917044 |
| N23  | 0.000000 | -2.034506 | 0.000000  | -0.776446 |
| N24  | 0.000000 | 0.000000  | 2.092880  | -0.917044 |
| H25  | 0.000000 | 0.000000  | 1.096318  | 0.514781  |
| H26  | 0.000000 | 0.000000  | -1.096318 | 0.514781  |
| H27  | 0.000000 | 1.331702  | -5.067969 | 0.224413  |
| H28  | 0.000000 | -1.331702 | -5.067969 | 0.224413  |
| H29  | 0.000000 | -1.331702 | 5.067969  | 0.224413  |
| H30  | 0.000000 | 1.331702  | 5.067969  | 0.224413  |
| H31  | 0.000000 | 5.078424  | 1.337330  | 0.210947  |
| H32  | 0.000000 | 5.078424  | -1.337330 | 0.210947  |
| H33  | 0.000000 | -5.078424 | -1.337330 | 0.210947  |
| H34  | 0.000000 | -5.078424 | 1.337330  | 0.210947  |
| H35  | 0.000000 | 3.189761  | -3.154855 | 0.215133  |
| H36  | 0.000000 | -3.189761 | -3.154855 | 0.215133  |
| H37  | 0.000000 | -3.189761 | 3.154855  | 0.215133  |
| H38  | 0.000000 | 3.189761  | 3.154855  | 0.215133  |

(a) Optimized using Gaussian03 and RHF/6-31G(d) procedures.  
 Total energy = -983.250771778 Hartree. Point Group = d2h  
 Dipole moment = 0.00000 D (0.00000, 0.00000, 0.00000)  
 Mulliken charges are listed in last column.



**Table S8. Ground State Coordinates of chlorin<sup>(a)</sup>**

| Atom | X (Å)     | Y (Å)     | Z (Å)     | Charge    |
|------|-----------|-----------|-----------|-----------|
| C 1  | 0.000000  | 0.678886  | 4.311213  | -0.248609 |
| C 2  | 0.000000  | -0.678886 | 4.311213  | -0.248609 |
| C 3  | 0.000000  | -1.069019 | 2.934707  | 0.271399  |
| C 4  | 0.000000  | -2.409668 | 2.486911  | -0.236832 |
| C 5  | 0.000000  | -2.861571 | 1.203888  | 0.319814  |
| C 6  | 0.000000  | -4.216417 | 0.746490  | -0.189217 |
| C 7  | 0.000000  | -4.211435 | -0.605843 | -0.286474 |
| C 8  | 0.000000  | -2.840381 | -1.040911 | 0.455928  |
| C 9  | 0.000000  | -2.398603 | -2.371880 | -0.389551 |
| C10  | 0.000000  | -1.094201 | -2.809783 | 0.387609  |
| C11  | 0.000000  | -0.764644 | -4.292816 | -0.377140 |
| C12  | 0.000000  | 0.764644  | -4.292816 | -0.377140 |
| C13  | 0.000000  | 1.094201  | -2.809783 | 0.387609  |
| C14  | 0.000000  | 2.398603  | -2.371880 | -0.389551 |
| C15  | 0.000000  | 2.840381  | -1.040911 | 0.455928  |
| C16  | 0.000000  | 4.211435  | -0.605843 | -0.286474 |
| C17  | 0.000000  | 4.216417  | 0.746490  | -0.189217 |
| C18  | 0.000000  | 2.861571  | 1.203888  | 0.319814  |
| C19  | 0.000000  | 2.409668  | 2.486911  | -0.236832 |
| C20  | 0.000000  | 1.069019  | 2.934707  | 0.271399  |
| N21  | 0.000000  | 0.000000  | 2.126454  | -0.751772 |
| N22  | 0.000000  | -2.084225 | 0.058630  | -0.919153 |
| N23  | 0.000000  | 0.000000  | -2.042558 | -0.741730 |
| N24  | 0.000000  | 2.084225  | 0.058630  | -0.919153 |
| H25  | 0.000000  | 1.088712  | 0.066267  | 0.506082  |
| H26  | 0.000000  | -1.088712 | 0.066267  | 0.506082  |
| H27  | 0.000000  | -5.053656 | -1.267152 | 0.219211  |
| H28  | 0.000000  | 5.053656  | -1.267152 | 0.219211  |
| H29  | 0.000000  | -5.071213 | 1.393267  | 0.227912  |
| H30  | 0.000000  | 5.071213  | 1.393267  | 0.227912  |
| H31  | 0.000000  | 1.342185  | 5.154350  | 0.194267  |
| H32  | 0.000000  | -1.342185 | 5.154350  | 0.194267  |
| H33  | 0.000000  | -3.171328 | -3.118296 | 0.194998  |
| H34  | 0.000000  | 3.171328  | -3.118296 | 0.194998  |
| H35  | 0.000000  | -3.168639 | 3.249408  | 0.220547  |
| H36  | 0.000000  | 3.168639  | 3.249408  | 0.220547  |
| H37  | 0.873426  | -1.186736 | -4.776872 | 0.197980  |
| H38  | -0.873426 | -1.186736 | -4.776872 | 0.197980  |
| H39  | 0.873426  | 1.186736  | -4.776872 | 0.197980  |
| H40  | -0.873426 | 1.186736  | -4.776872 | 0.197980  |

(a) Optimized using Gaussian03 and RHF/6-31G(d) procedures.  
Total energy = -984.429436153 Hartree. Point Group = c2v  
Dipole moment = 2.62910 D (0.00000, 0.00000, -2.62910)  
Mulliken charges are listed in last column.

**Table S9. Ground State Coordinates of chlorin 5aH<sub>2</sub><sup>(a)</sup> w/o Ph**

| Atom | X (Å)     | Y (Å)     | Z (Å)    | Charge    |
|------|-----------|-----------|----------|-----------|
| C 1  | -4.224864 | 1.609003  | 0.000000 | -0.177982 |
| C 2  | -4.525301 | 0.285035  | 0.000000 | -0.180778 |
| C 3  | -3.249915 | -0.420982 | 0.000000 | 0.345131  |
| C 4  | -3.146060 | -1.823740 | 0.000000 | -0.273011 |
| C 5  | -1.981777 | -2.579038 | 0.000000 | 0.396272  |
| C 6  | -1.841601 | -4.008150 | 0.000000 | -0.185329 |
| C 7  | -0.503121 | -4.304699 | 0.000000 | -0.194426 |
| C 8  | 0.227561  | -3.066432 | 0.000000 | 0.414394  |
| C 9  | 1.612236  | -2.892554 | 0.000000 | -0.308505 |
| C10  | 2.255794  | -1.658420 | 0.000000 | 0.598424  |
| C11  | 2.743154  | 0.439135  | 0.000000 | 0.255353  |
| C12  | 2.685306  | 1.822357  | 0.000000 | -0.263021 |
| C13  | 1.513415  | 2.590729  | 0.000000 | 0.400934  |
| C14  | 1.385205  | 4.016454  | 0.000000 | -0.194198 |
| C15  | 0.044421  | 4.321902  | 0.000000 | -0.190318 |
| C16  | -0.689741 | 3.092879  | 0.000000 | 0.393418  |
| C17  | -2.072161 | 2.908277  | 0.000000 | -0.269545 |
| C18  | -2.770137 | 1.695303  | 0.000000 | 0.343347  |
| N19  | -2.203974 | 0.450273  | 0.000000 | -0.674961 |
| N20  | -0.704630 | -2.063930 | 0.000000 | -0.768558 |
| N21  | 1.707081  | -0.441234 | 0.000000 | -0.639090 |
| N22  | 0.240937  | 2.081598  | 0.000000 | -0.761016 |
| C23  | 4.023726  | -0.308571 | 0.000000 | 0.573521  |
| O24  | 5.173837  | 0.046894  | 0.000000 | -0.460438 |
| H25  | -0.500865 | -1.069865 | 0.000000 | 0.415406  |
| H26  | 0.000000  | 1.095820  | 0.000000 | 0.415546  |
| H27  | -2.669470 | 3.815774  | 0.000000 | 0.144615  |
| H28  | -4.903385 | 2.453344  | 0.000000 | 0.135196  |
| H29  | -5.501954 | -0.183425 | 0.000000 | 0.134603  |
| H30  | -4.077178 | -2.383191 | 0.000000 | 0.143389  |
| H31  | -2.671035 | -4.702972 | 0.000000 | 0.151788  |
| H32  | -0.042235 | -5.283412 | 0.000000 | 0.152891  |
| H33  | 2.237216  | -3.777642 | 0.000000 | 0.164280  |
| H34  | 3.634338  | 2.348754  | 0.000000 | 0.170266  |
| H35  | 2.220271  | 4.704155  | 0.000000 | 0.153133  |
| H36  | -0.407896 | 5.304777  | 0.000000 | 0.150034  |
| O37  | 3.637346  | -1.649393 | 0.000000 | -0.510764 |

(a) Optimized using Gaussian03 and B3LYP/6-31G(d) procedures.  
Total energy = -1100.712248930 Hartree. Point Group = cs  
Dipole moment = 5.00560 D (-5.00060, 0.22220, 0.00000)  
Mulliken charges are listed in last column.

**Table S10. Ground State Coordinates of chlorin 7aH<sub>2</sub><sup>(a)</sup> w/o Ph**

| Atom | X (Å)     | Y (Å)     | Z (Å)     | Charge    |
|------|-----------|-----------|-----------|-----------|
| C 1  | 0.140477  | -4.780436 | 0.679786  | -0.183243 |
| C 2  | 0.140477  | -4.780436 | -0.679786 | -0.183243 |
| C 3  | 0.071244  | -3.384771 | -1.085086 | 0.341281  |
| C 4  | 0.059987  | -2.965850 | -2.424225 | -0.273304 |
| C 5  | 0.002695  | -1.660522 | -2.897929 | 0.388365  |
| C 6  | 0.002389  | -1.208180 | -4.256418 | -0.189008 |
| C 7  | -0.060923 | 0.163900  | -4.247909 | -0.200451 |
| C 8  | -0.103594 | 0.599854  | -2.882650 | 0.409473  |
| C 9  | -0.182124 | 1.920260  | -2.418583 | -0.266150 |
| C10  | -0.241651 | 2.360155  | -1.104723 | 0.338171  |
| C11  | -0.352685 | 3.846605  | -0.781769 | 0.024924  |
| C12  | -0.352685 | 3.846605  | 0.781769  | 0.024924  |
| C13  | -0.241651 | 2.360155  | 1.104723  | 0.338171  |
| C14  | -0.182124 | 1.920260  | 2.418583  | -0.266150 |
| C15  | -0.103594 | 0.599854  | 2.882650  | 0.409473  |
| C16  | -0.060923 | 0.163900  | 4.247909  | -0.200451 |
| C17  | 0.002389  | -1.208180 | 4.256418  | -0.189008 |
| C18  | 0.002695  | -1.660522 | 2.897929  | 0.388365  |
| C19  | 0.059987  | -2.965850 | 2.424225  | -0.273304 |
| C20  | 0.071244  | -3.384771 | 1.085086  | 0.341281  |
| N21  | 0.028077  | -2.558686 | 0.000000  | -0.677834 |
| N22  | -0.063644 | -0.529168 | -2.111387 | -0.763755 |
| N23  | -0.208952 | 1.584234  | 0.000000  | -0.601013 |
| N24  | -0.063644 | -0.529168 | 2.111387  | -0.763755 |
| O25  | 0.726506  | 4.538613  | 1.390620  | -0.600252 |
| O26  | 0.726506  | 4.538613  | -1.390620 | -0.600252 |
| H27  | 0.560143  | 5.490482  | -1.311015 | 0.385967  |
| H28  | 0.560143  | 5.490482  | 1.311015  | 0.385967  |
| H29  | -0.070748 | -0.552457 | -1.097961 | 0.407423  |
| H30  | -0.070748 | -0.552457 | 1.097961  | 0.407423  |
| H31  | -0.077370 | 0.830799  | -5.099745 | 0.142051  |
| H32  | -0.077370 | 0.830799  | 5.099745  | 0.142051  |
| H33  | 0.047174  | -1.862238 | -5.117385 | 0.143079  |
| H34  | 0.047174  | -1.862238 | 5.117385  | 0.143079  |
| H35  | 0.184087  | -5.628495 | 1.352571  | 0.127222  |
| H36  | 0.184087  | -5.628495 | -1.352571 | 0.127222  |
| H37  | -0.185168 | 2.689141  | -3.184838 | 0.140258  |
| H38  | -0.185168 | 2.689141  | 3.184838  | 0.140258  |
| H39  | 0.105409  | -3.743595 | -3.181615 | 0.136998  |
| H40  | 0.105409  | -3.743595 | 3.181615  | 0.136998  |
| H41  | -1.311897 | 4.236136  | -1.157582 | 0.130375  |
| H42  | -1.311897 | 4.236136  | 1.157582  | 0.130375  |

(a) Optimized using Gaussian03 and B3LYP/6-31G(d) procedures. Total energy = -1141.171086680 Hartree. Point Group = cs Dipole moment = 3.59920 D (-2.09780, 2.92470, 0.00000) Mulliken charges are listed in last column.

**Table S11. Ground State Coordinates of chlorin 10aH<sub>2</sub><sup>(a)</sup> w/o Ph**

| Atom | X (Å)     | Y (Å)     | Z (Å)     | Charge    |
|------|-----------|-----------|-----------|-----------|
| C 1  | 4.342203  | -1.424616 | 0.067103  | -0.181759 |
| C 2  | 4.582811  | -0.086509 | 0.110192  | -0.184742 |
| C 3  | 3.280812  | 0.560512  | 0.078738  | 0.340885  |
| C 4  | 3.108956  | 1.958698  | 0.110276  | -0.273193 |
| C 5  | 1.913370  | 2.657619  | 0.087574  | 0.391252  |
| C 6  | 1.703889  | 4.076901  | 0.123590  | -0.184927 |
| C 7  | 0.353331  | 4.310076  | 0.085631  | -0.200437 |
| C 8  | -0.318471 | 3.039537  | 0.024095  | 0.418783  |
| C 9  | -1.695930 | 2.811903  | -0.028126 | -0.316560 |
| C10  | -2.304462 | 1.561861  | -0.098377 | 0.593734  |
| C11  | -2.696908 | -0.563085 | -0.192598 | 0.250180  |
| C12  | -2.555543 | -1.936252 | -0.218709 | -0.285509 |
| C13  | -1.341297 | -2.648658 | -0.185689 | 0.406756  |
| C14  | -1.151998 | -4.066336 | -0.214441 | -0.204545 |
| C15  | 0.201039  | -4.315987 | -0.166061 | -0.189023 |
| C16  | 0.881241  | -3.060493 | -0.106270 | 0.385908  |
| C17  | 2.250536  | -2.816590 | -0.046665 | -0.268512 |
| C18  | 2.897489  | -1.574909 | 0.009831  | 0.338445  |
| N19  | 2.275927  | -0.355903 | 0.018421  | -0.675912 |
| N20  | 0.658758  | 2.083623  | 0.027599  | -0.770427 |
| N21  | -1.709268 | 0.361868  | -0.114430 | -0.613111 |
| N22  | -0.096717 | -2.087520 | -0.119645 | -0.762723 |
| C23  | -4.056427 | 0.127727  | -0.200943 | 0.284097  |
| O24  | -4.902585 | -0.220344 | 0.850776  | -0.578209 |
| O25  | -3.674211 | 1.517031  | -0.160571 | -0.525020 |
| H26  | -4.646009 | -0.031623 | -1.108051 | 0.167034  |
| H27  | -4.380348 | -0.215641 | 1.671301  | 0.395991  |
| H28  | 0.505764  | 1.081649  | -0.008546 | 0.410964  |
| H29  | 0.102322  | -1.093461 | -0.087531 | 0.412142  |
| H30  | -0.154018 | 5.265521  | 0.097518  | 0.146693  |
| H31  | -1.955636 | -4.788850 | -0.266018 | 0.143717  |
| H32  | 0.693942  | -5.279307 | -0.171345 | 0.145024  |
| H33  | 2.498525  | 4.809874  | 0.172257  | 0.147291  |
| H34  | 5.537182  | 0.423834  | 0.158651  | 0.128652  |
| H35  | 5.058671  | -2.237182 | 0.072798  | 0.129168  |
| H36  | -2.350017 | 3.675796  | -0.020653 | 0.152767  |
| H37  | -3.463361 | -2.529821 | -0.264883 | 0.145475  |
| H38  | 4.012097  | 2.560631  | 0.159459  | 0.139194  |
| H39  | 2.886504  | -3.697783 | -0.045119 | 0.140457  |

(a) Optimized using Gaussian03 and B3LYP/6-31G(d) procedures. Total energy = -1101.891047750 Hartree. Point Group = c1 Dipole moment = 1.30180 D (1.18340, -0.39620, 0.37030) Mulliken charges are listed in last column.

**Table S12. Ground State Coordinates of chlorin 12aH<sub>2</sub><sup>(a)</sup> w/o Ph**

| Atom | X (Å)     | Y (Å)     | Z (Å)     | Charge    |
|------|-----------|-----------|-----------|-----------|
| C 1  | 4.302661  | -0.657246 | 0.000335  | -0.185986 |
| C 2  | 4.295283  | 0.704001  | 0.000003  | -0.183320 |
| C 3  | 2.898323  | 1.101208  | 0.000062  | 0.337000  |
| C 4  | 2.472303  | 2.437520  | -0.000056 | -0.267955 |
| C 5  | 1.165983  | 2.914095  | -0.000080 | 0.384324  |
| C 6  | 0.711310  | 4.268900  | -0.000278 | -0.187941 |
| C 7  | -0.664978 | 4.257487  | -0.000227 | -0.207294 |
| C 8  | -1.096808 | 2.892634  | -0.000080 | 0.409249  |
| C 9  | -2.419355 | 2.408449  | -0.000063 | -0.293525 |
| C10  | -2.806859 | 1.082747  | 0.000047  | 0.298233  |
| C11  | -4.252855 | 0.613362  | 0.000618  | -0.086539 |
| C12  | -2.776197 | -1.085684 | 0.000060  | 0.601770  |
| C13  | -2.385855 | -2.422230 | -0.000120 | -0.318254 |
| C14  | -1.066886 | -2.883176 | -0.000134 | 0.421008  |
| C15  | -0.625030 | -4.252589 | -0.000248 | -0.202452 |
| C16  | 0.745985  | -4.258629 | -0.000151 | -0.184434 |
| C17  | 1.199020  | -2.897358 | -0.000029 | 0.389050  |
| C18  | 2.497470  | -2.417509 | 0.000005  | -0.272524 |
| C19  | 2.909510  | -1.069360 | 0.000082  | 0.339210  |
| N20  | 2.076223  | 0.007747  | 0.000240  | -0.676010 |
| N21  | 0.061261  | -2.112233 | 0.000027  | -0.771060 |
| N22  | -1.992524 | -0.000213 | 0.000055  | -0.607975 |
| N23  | 0.032282  | 2.124463  | 0.000038  | -0.764589 |
| O24  | -4.121304 | -0.814806 | -0.000301 | -0.515533 |
| H25  | -4.814313 | 0.923879  | -0.889691 | 0.171644  |
| H26  | 0.057196  | 1.110792  | 0.000059  | 0.411228  |
| H27  | 0.086967  | -1.098496 | 0.000005  | 0.409820  |
| H28  | -1.290992 | -5.105202 | -0.000357 | 0.144338  |
| H29  | -1.332565 | 5.108927  | -0.000315 | 0.139797  |
| H30  | 1.363235  | 5.132663  | -0.000391 | 0.143444  |
| H31  | 1.401651  | -5.119597 | -0.000160 | 0.145657  |
| H32  | 5.155910  | -1.324841 | 0.000488  | 0.126430  |
| H33  | 5.141239  | 1.380826  | -0.000111 | 0.126848  |
| H34  | -3.177072 | -3.162536 | -0.000262 | 0.148765  |
| H35  | -3.200814 | 3.162841  | -0.000162 | 0.129303  |
| H36  | 3.283063  | -3.168150 | 0.000009  | 0.137800  |
| H37  | 3.250457  | 3.196225  | -0.000174 | 0.138842  |
| H38  | -4.812380 | 0.923028  | 0.892483  | 0.171629  |

(a) Optimized using Gaussian03 and B3LYP/6-31G(d) procedures. Total energy = -1026.670810840 Hartree. Point Group = c1 Dipole moment = 1.17810 D (-0.90840, 0.75020, 0.00060) Mulliken charges are listed in last column.

**Table S13. Ground State Coordinates of TPP<sup>(a)</sup>**

| Atom | X (Å)     | Y (Å)     | Z (Å)     | Charge    |
|------|-----------|-----------|-----------|-----------|
| C 1  | -4.260254 | 0.676919  | -0.184702 | -0.181317 |
| C 2  | -4.260254 | -0.676919 | -0.184702 | -0.181317 |
| C 3  | -2.865333 | -1.087627 | -0.053945 | 0.301535  |
| C 4  | -2.463557 | -2.440654 | -0.012586 | -0.047044 |
| C 5  | -1.132653 | -2.890891 | 0.022330  | 0.348277  |
| C 6  | -0.684685 | -4.248655 | 0.135075  | -0.190792 |
| C 7  | 0.684685  | -4.248655 | 0.135075  | -0.190792 |
| C 8  | 1.132653  | -2.890891 | 0.022330  | 0.348277  |
| C 9  | 2.463557  | -2.440654 | -0.012586 | -0.047044 |
| C10  | 2.865333  | -1.087627 | -0.053945 | 0.301535  |
| C11  | 4.260254  | -0.676919 | -0.184702 | -0.181317 |
| C12  | 4.260254  | 0.676919  | -0.184702 | -0.181317 |
| C13  | 2.865333  | 1.087627  | -0.053945 | 0.301535  |
| C14  | 2.463557  | 2.440654  | -0.012586 | -0.047044 |
| C15  | 1.132653  | 2.890891  | 0.022330  | 0.348277  |
| C16  | 0.684685  | 4.248655  | 0.135075  | -0.190792 |
| C17  | -0.684685 | 4.248655  | 0.135075  | -0.190792 |
| C18  | -1.132653 | 2.890891  | 0.022330  | 0.348277  |
| C19  | -2.463557 | 2.440654  | -0.012586 | -0.047044 |
| C20  | -2.865333 | 1.087627  | -0.053945 | 0.301535  |
| N21  | -2.039718 | 0.000000  | 0.006234  | -0.687437 |
| N22  | 0.000000  | -2.111182 | -0.035000 | -0.772895 |
| N23  | 2.039718  | 0.000000  | 0.006234  | -0.687437 |
| N24  | 0.000000  | 2.111182  | -0.035000 | -0.772895 |
| C25  | -3.527030 | 3.496005  | 0.001404  | 0.015917  |
| C26  | -3.681694 | 4.377651  | -1.080205 | -0.157580 |
| C27  | -4.672359 | 5.360354  | -1.064857 | -0.134538 |
| C28  | -5.524702 | 5.480542  | 0.034207  | -0.125729 |
| C29  | -5.380823 | 4.610673  | 1.116780  | -0.134401 |
| C30  | -4.391497 | 3.627019  | 1.099974  | -0.154155 |
| C31  | -4.391497 | -3.627019 | 1.099974  | -0.154155 |
| C32  | -5.380823 | -4.610673 | 1.116780  | -0.134401 |
| C33  | -5.524702 | -5.480542 | 0.034207  | -0.125729 |
| C34  | -4.672359 | -5.360354 | -1.064857 | -0.134538 |
| C35  | -3.681694 | -4.377651 | -1.080205 | -0.157580 |
| C36  | -3.527030 | -3.496005 | 0.001404  | 0.015917  |
| C37  | 3.527030  | -3.496005 | 0.001404  | 0.015917  |
| C38  | 3.681694  | -4.377651 | -1.080205 | -0.157580 |
| C39  | 4.672359  | -5.360354 | -1.064857 | -0.134538 |
| C40  | 5.524702  | -5.480542 | 0.034207  | -0.125729 |
| C41  | 5.380823  | -4.610673 | 1.116780  | -0.134401 |
| C42  | 4.391497  | -3.627019 | 1.099974  | -0.154155 |
| C43  | 4.391497  | 3.627019  | 1.099974  | -0.154155 |
| C44  | 5.380823  | 4.610673  | 1.116780  | -0.134401 |
| C45  | 5.524702  | 5.480542  | 0.034207  | -0.125729 |
| C46  | 4.672359  | 5.360354  | -1.064857 | -0.134538 |

|     |           |           |           |           |
|-----|-----------|-----------|-----------|-----------|
| C47 | 3.681694  | 4.377651  | -1.080205 | -0.157580 |
| C48 | 3.527030  | 3.496005  | 0.001404  | 0.015917  |
| H49 | 4.278159  | 2.954399  | 1.945449  | 0.142299  |
| H50 | 0.000000  | -1.096559 | -0.062448 | 0.412529  |
| H51 | 0.000000  | 1.096559  | -0.062448 | 0.412529  |
| H52 | -1.338733 | -5.103551 | 0.218198  | 0.158485  |
| H53 | 1.338733  | -5.103551 | 0.218198  | 0.158485  |
| H54 | 1.338733  | 5.103551  | 0.218198  | 0.158485  |
| H55 | -1.338733 | 5.103551  | 0.218198  | 0.158485  |
| H56 | -5.107979 | 1.339573  | -0.282479 | 0.146577  |
| H57 | -5.107979 | -1.339573 | -0.282479 | 0.146577  |
| H58 | 5.107979  | -1.339573 | -0.282479 | 0.146577  |
| H59 | 5.107979  | 1.339573  | -0.282479 | 0.146577  |
| H60 | -4.278159 | 2.954399  | 1.945449  | 0.142299  |
| H61 | -4.278159 | -2.954399 | 1.945449  | 0.142299  |
| H62 | 4.278159  | -2.954399 | 1.945449  | 0.142299  |
| H63 | -3.025251 | 4.281078  | -1.940557 | 0.139898  |
| H64 | -3.025251 | -4.281078 | -1.940557 | 0.139898  |
| H65 | 3.025251  | -4.281078 | -1.940557 | 0.139898  |
| H66 | 3.025251  | 4.281078  | -1.940557 | 0.139898  |
| H67 | -6.295883 | 6.246124  | 0.046758  | 0.131149  |
| H68 | -6.295883 | -6.246124 | 0.046758  | 0.131149  |
| H69 | 6.295883  | -6.246124 | 0.046758  | 0.131149  |
| H70 | 6.295883  | 6.246124  | 0.046758  | 0.131149  |
| H71 | -6.037147 | 4.699162  | 1.978604  | 0.132857  |
| H72 | -6.037147 | -4.699162 | 1.978604  | 0.132857  |
| H73 | 6.037147  | -4.699162 | 1.978604  | 0.132857  |
| H74 | 6.037147  | 4.699162  | 1.978604  | 0.132857  |
| H75 | -4.780512 | 6.028970  | -1.914927 | 0.132463  |
| H76 | -4.780512 | -6.028970 | -1.914927 | 0.132463  |
| H77 | 4.780512  | -6.028970 | -1.914927 | 0.132463  |
| H78 | 4.780512  | 6.028970  | -1.914927 | 0.132463  |

---

(a) Optimized using Gaussian03 and B3LYP/6-31G(d) procedures.  
Total energy = -1913.751108910 Hartree. Point Group = c2v  
Dipole moment = 0.03760 D (0.00000, 0.00000, -0.03760)  
Mulliken charges are listed in last column.

**Table S14. Ground State Coordinates of TPP 1aH<sub>2</sub><sup>(a)</sup>**

| Atom | X (Å)     | Y (Å)     | Z (Å)     | Charge    |
|------|-----------|-----------|-----------|-----------|
| C 1  | 4.260257  | -0.677012 | -0.184616 | -0.181314 |
| C 2  | 4.260305  | 0.676825  | -0.184646 | -0.181313 |
| C 3  | 2.865390  | 1.087586  | -0.053899 | 0.301520  |
| C 4  | 2.463628  | 2.440597  | -0.012600 | -0.047000 |
| C 5  | 1.132678  | 2.890826  | 0.022245  | 0.348249  |
| C 6  | 0.684749  | 4.248575  | 0.135248  | -0.190801 |
| C 7  | -0.684641 | 4.248592  | 0.135250  | -0.190801 |
| C 8  | -1.132603 | 2.890854  | 0.022244  | 0.348249  |
| C 9  | -2.463565 | 2.440659  | -0.012602 | -0.047000 |
| C10  | -2.865362 | 1.087658  | -0.053902 | 0.301520  |
| C11  | -4.260288 | 0.676934  | -0.184642 | -0.181313 |
| C12  | -4.260274 | -0.676904 | -0.184626 | -0.181314 |
| C13  | -2.865325 | -1.087564 | -0.053838 | 0.301568  |
| C14  | -2.463584 | -2.440603 | -0.012493 | -0.047066 |
| C15  | -1.132686 | -2.890856 | 0.022465  | 0.348297  |
| C16  | -0.684745 | -4.248645 | 0.135175  | -0.190789 |
| C17  | 0.684636  | -4.248662 | 0.135176  | -0.190789 |
| C18  | 1.132611  | -2.890885 | 0.022464  | 0.348297  |
| C19  | 2.463521  | -2.440665 | -0.012495 | -0.047066 |
| C20  | 2.865297  | -1.087637 | -0.053836 | 0.301568  |
| N21  | 2.039701  | -0.000018 | 0.006238  | -0.687443 |
| N22  | 0.000027  | 2.111150  | -0.035173 | -0.772886 |
| N23  | -2.039700 | 0.000033  | 0.006231  | -0.687443 |
| N24  | -0.000027 | -2.111153 | -0.034510 | -0.772917 |
| C25  | 3.526966  | -3.496062 | 0.001406  | 0.015883  |
| C26  | 3.681768  | -4.377438 | -1.080399 | -0.157566 |
| C27  | 4.672412  | -5.360170 | -1.065173 | -0.134533 |
| C28  | 5.524610  | -5.480656 | 0.033963  | -0.125732 |
| C29  | 5.380614  | -4.611038 | 1.116733  | -0.134400 |
| C30  | 4.391317  | -3.627366 | 1.100045  | -0.154150 |
| C31  | 4.391771  | 3.626820  | 1.099821  | -0.154179 |
| C32  | 5.381091  | 4.610477  | 1.116606  | -0.134400 |
| C33  | 5.524749  | 5.480554  | 0.034173  | -0.125731 |
| C34  | 4.672175  | 5.360548  | -1.064739 | -0.134536 |
| C35  | 3.681528  | 4.377840  | -1.080064 | -0.157589 |
| C36  | 3.527063  | 3.495972  | 0.001414  | 0.015935  |
| C37  | -3.526973 | 3.496061  | 0.001412  | 0.015935  |
| C38  | -3.681415 | 4.377934  | -1.080064 | -0.157589 |
| C39  | -4.672037 | 5.360667  | -1.064739 | -0.134536 |
| C40  | -5.524609 | 5.480693  | 0.034171  | -0.125731 |
| C41  | -5.380975 | 4.610611  | 1.116603  | -0.134399 |
| C42  | -4.391680 | 3.626929  | 1.099818  | -0.154179 |
| C43  | -4.391409 | -3.627255 | 1.100047  | -0.154149 |
| C44  | -5.380731 | -4.610902 | 1.116736  | -0.134400 |
| C45  | -5.524749 | -5.480518 | 0.033967  | -0.125732 |
| C46  | -4.672547 | -5.360054 | -1.065169 | -0.134533 |



|     |           |           |           |           |
|-----|-----------|-----------|-----------|-----------|
| C47 | -3.681879 | -4.377346 | -1.080396 | -0.157567 |
| C48 | -3.527056 | -3.495973 | 0.001408  | 0.015883  |
| H49 | -4.277947 | -2.954851 | 1.945672  | 0.142293  |
| H50 | -0.000015 | -1.096521 | -0.062172 | 0.412533  |
| H51 | 0.000015  | 1.096516  | -0.062883 | 0.412527  |
| H52 | -1.338699 | 5.103448  | 0.218627  | 0.158485  |
| H53 | 1.338829  | 5.103415  | 0.218624  | 0.158485  |
| H54 | -1.338836 | -5.103499 | 0.218336  | 0.158484  |
| H55 | 1.338706  | -5.103532 | 0.218338  | 0.158484  |
| H56 | -5.107925 | -1.339649 | -0.282383 | 0.146583  |
| H57 | 5.107993  | 1.339514  | -0.282462 | 0.146582  |
| H58 | 5.107891  | -1.339780 | -0.282367 | 0.146583  |
| H59 | -5.107960 | 1.339645  | -0.282452 | 0.146582  |
| H60 | 4.278596  | 2.954086  | 1.945221  | 0.142301  |
| H61 | 4.277871  | -2.954960 | 1.945670  | 0.142293  |
| H62 | -4.278523 | 2.954190  | 1.945217  | 0.142301  |
| H63 | -3.025569 | -4.280562 | -1.940820 | 0.139893  |
| H64 | 3.024946  | 4.281398  | -1.940319 | 0.139897  |
| H65 | 3.025460  | -4.280636 | -1.940823 | 0.139893  |
| H66 | -3.024834 | 4.281477  | -1.940319 | 0.139897  |
| H67 | -6.295768 | 6.246289  | 0.046703  | 0.131151  |
| H68 | 6.295927  | 6.246131  | 0.046704  | 0.131151  |
| H69 | 6.295779  | -6.246244 | 0.046427  | 0.131149  |
| H70 | -6.295937 | -6.246087 | 0.046432  | 0.131149  |
| H71 | -6.037453 | 4.698953  | 1.978317  | 0.132858  |
| H72 | -6.036943 | -4.699602 | 1.978616  | 0.132857  |
| H73 | 6.037570  | 4.698804  | 1.978321  | 0.132858  |
| H74 | 6.036824  | -4.699755 | 1.978613  | 0.132857  |
| H75 | 4.780143  | 6.029302  | -1.914716 | 0.132464  |
| H76 | -4.780803 | -6.028439 | -1.915400 | 0.132463  |
| H77 | -4.779987 | 6.029426  | -1.914715 | 0.132464  |
| H78 | 4.780651  | -6.028557 | -1.915405 | 0.132463  |

---

(a) Optimized using Gaussian03 and B3LYP/6-31G(d) procedures.  
Total energy = -1913.751108900 Hartree. Point Group = c1  
Dipole moment = 0.03790 D (0.00000, 0.00000, -0.03790)  
Mulliken charges are listed in last column.

**Table S15. Ground State Coordinates of TPC<sup>(a)</sup>**

| Atom | X (Å)     | Y (Å)     | Z (Å)     | Charge    |
|------|-----------|-----------|-----------|-----------|
| C 1  | -4.292072 | 0.681837  | -0.155263 | -0.185769 |
| C 2  | -4.292967 | -0.676145 | -0.155739 | -0.185767 |
| C 3  | -2.903775 | -1.086147 | -0.034756 | 0.296326  |
| C 4  | -2.495889 | -2.442948 | -0.013757 | -0.042958 |
| C 5  | -1.171000 | -2.892992 | 0.008227  | 0.335280  |
| C 6  | -0.712007 | -4.247919 | 0.069795  | -0.185289 |
| C 7  | 0.658686  | -4.237155 | 0.068027  | -0.201488 |
| C 8  | 1.096717  | -2.873199 | 0.016001  | 0.374988  |
| C 9  | 2.438565  | -2.432582 | 0.004300  | -0.081115 |
| C10  | 2.879976  | -1.106411 | -0.016179 | 0.316659  |
| C11  | 4.368283  | -0.768416 | -0.029997 | -0.354251 |
| C12  | 4.369286  | 0.762699  | -0.032768 | -0.354248 |
| C13  | 2.881443  | 1.102681  | -0.017201 | 0.316653  |
| C14  | 2.441796  | 2.429438  | 0.003219  | -0.081130 |
| C15  | 1.100526  | 2.871792  | 0.015884  | 0.374985  |
| C16  | 0.664272  | 4.236296  | 0.068401  | -0.201491 |
| C17  | -0.706408 | 4.248812  | 0.071017  | -0.185298 |
| C18  | -1.167171 | 2.894491  | 0.009375  | 0.335299  |
| C19  | -2.492657 | 2.446183  | -0.012367 | -0.042950 |
| C20  | -2.902333 | 1.089930  | -0.034039 | 0.296315  |
| N21  | -2.076115 | 0.001322  | 0.025929  | -0.692352 |
| N22  | -0.035283 | -2.101542 | -0.017319 | -0.778391 |
| N23  | 2.096233  | -0.001346 | -0.016985 | -0.604913 |
| N24  | -0.032485 | 2.101591  | -0.016878 | -0.778389 |
| C25  | -3.555719 | 3.502197  | -0.014699 | 0.016758  |
| C26  | -3.718596 | 4.358023  | -1.115318 | -0.157061 |
| C27  | -4.708657 | 5.341642  | -1.114790 | -0.134823 |
| C28  | -5.551532 | 5.488311  | -0.011822 | -0.125752 |
| C29  | -5.399369 | 4.643507  | 1.089450  | -0.134662 |
| C30  | -4.411471 | 3.658406  | 1.087221  | -0.152865 |
| C31  | -3.560301 | -3.497601 | -0.016942 | 0.016760  |
| C32  | -3.723917 | -4.352632 | -1.118066 | -0.157053 |
| C33  | -4.715200 | -5.335022 | -1.118350 | -0.134822 |
| C34  | -5.558575 | -5.481234 | -0.015706 | -0.125752 |
| C35  | -5.405680 | -4.637215 | 1.086069  | -0.134664 |
| C36  | -4.416561 | -3.653339 | 1.084651  | -0.152870 |
| C37  | 3.484891  | -3.513675 | 0.019665  | 0.010088  |
| C38  | 3.973419  | -4.056211 | -1.178238 | -0.153149 |
| C39  | 4.948341  | -5.055492 | -1.165895 | -0.132536 |
| C40  | 5.449663  | -5.530231 | 0.047433  | -0.126640 |
| C41  | 4.969202  | -5.001969 | 1.247052  | -0.132561 |
| C42  | 3.994729  | -4.002344 | 1.231912  | -0.153772 |
| C43  | 3.489531  | 3.509178  | 0.017363  | 0.010096  |
| C44  | 3.978602  | 4.049842  | -1.181157 | -0.153135 |
| C45  | 4.954795  | 5.047901  | -1.169974 | -0.132532 |
| C46  | 5.456863  | 5.523265  | 0.042796  | -0.126640 |

|     |           |           |           |           |
|-----|-----------|-----------|-----------|-----------|
| C47 | 4.975885  | 4.996854  | 1.243026  | -0.132566 |
| C48 | 4.000148  | 3.998448  | 1.229046  | -0.153787 |
| H49 | 3.623489  | 3.592429  | 2.164463  | 0.135962  |
| H50 | -0.057287 | 1.088680  | -0.030167 | 0.404952  |
| H51 | -0.058832 | -1.088595 | -0.030279 | 0.404954  |
| H52 | -1.352185 | 5.112952  | 0.116976  | 0.156407  |
| H53 | -1.358903 | -5.111252 | 0.115195  | 0.156405  |
| H54 | 1.328277  | 5.086944  | 0.106272  | 0.153823  |
| H55 | 1.321599  | -5.088643 | 0.106167  | 0.153824  |
| H56 | -5.141189 | 1.343549  | -0.247751 | 0.142139  |
| H57 | -5.142947 | -1.336685 | -0.248680 | 0.142139  |
| H58 | -4.297355 | -2.999622 | 1.943989  | 0.141966  |
| H59 | -4.292832 | 3.004084  | 1.946178  | 0.141964  |
| H60 | -3.069071 | 4.240551  | -1.978225 | 0.139873  |
| H61 | -3.073997 | -4.235506 | -1.980723 | 0.139870  |
| H62 | -6.330156 | -6.246565 | -0.015202 | 0.130014  |
| H63 | -6.322160 | 6.254601  | -0.010680 | 0.130014  |
| H64 | 6.208063  | -6.308594 | 0.058145  | 0.130413  |
| H65 | 6.216253  | 6.300675  | 0.052612  | 0.130413  |
| H66 | -6.055465 | -4.745763 | 1.950588  | 0.131789  |
| H67 | -6.048771 | 4.752394  | 1.954215  | 0.131788  |
| H68 | -4.830416 | -5.983142 | -1.983272 | 0.131462  |
| H69 | -4.823316 | 5.990369  | -1.979332 | 0.131462  |
| H70 | 5.351065  | -5.369131 | 2.196231  | 0.131626  |
| H71 | 5.358348  | 5.364506  | 2.191774  | 0.131627  |
| H72 | 5.320905  | 5.455342  | -2.108871 | 0.131441  |
| H73 | 5.314057  | -5.464369 | -2.104322 | 0.131441  |
| H74 | 3.580745  | -3.690719 | -2.123713 | 0.135341  |
| H75 | 3.585324  | 3.683895  | -2.126205 | 0.135335  |
| H76 | 3.618447  | -3.594912 | 2.166867  | 0.135956  |
| H77 | 4.881235  | 1.189975  | 0.835838  | 0.167446  |
| H78 | 4.877321  | -1.192869 | 0.841761  | 0.167450  |
| H79 | 4.860775  | -1.197192 | -0.909322 | 0.166969  |
| H80 | 4.859949  | 1.187290  | -0.915202 | 0.166971  |

---

(a) Optimized using Gaussian03 and B3LYP/6-31G(d) procedures.  
Total energy = -1914.964092050 Hartree. Point Group = c1  
Dipole moment = 1.74590 D (1.74560, -0.00120, -0.03130)  
Mulliken charges are listed in last column.

**Table S16. Ground State Coordinates of 5aH<sub>2</sub><sup>(a)</sup>**

| Atom | X (Å)     | Y (Å)     | Z (Å)     | Charge    |
|------|-----------|-----------|-----------|-----------|
| C 1  | -4.172395 | 1.458356  | -0.212468 | -0.179668 |
| C 2  | -4.430467 | 0.128026  | -0.183718 | -0.183141 |
| C 3  | -3.142355 | -0.536680 | -0.033238 | 0.301604  |
| C 4  | -3.007990 | -1.948649 | 0.032838  | -0.042384 |
| C 5  | -1.794229 | -2.643006 | 0.061748  | 0.344146  |
| C 6  | -1.599016 | -4.059527 | 0.188276  | -0.184255 |
| C 7  | -0.254323 | -4.311010 | 0.166325  | -0.194251 |
| C 8  | 0.435124  | -3.057699 | 0.030370  | 0.361109  |
| C 9  | 1.828309  | -2.867078 | -0.013787 | -0.105264 |
| C10  | 2.422465  | -1.593764 | -0.024831 | 0.570771  |
| C11  | 2.869781  | 0.521225  | 0.000764  | 0.215994  |
| C12  | 2.763986  | 1.911347  | 0.030271  | -0.062460 |
| C13  | 1.534518  | 2.609825  | 0.035574  | 0.366120  |
| C14  | 1.360536  | 4.027474  | 0.100940  | -0.192645 |
| C15  | 0.014146  | 4.293798  | 0.077734  | -0.188520 |
| C16  | -0.685456 | 3.048565  | -0.006664 | 0.342763  |
| C17  | -2.077628 | 2.851386  | -0.055269 | -0.039673 |
| C18  | -2.728858 | 1.599647  | -0.076345 | 0.297781  |
| N19  | -2.125297 | 0.370981  | 0.013235  | -0.689955 |
| N20  | -0.533287 | -2.085949 | -0.021084 | -0.783452 |
| N21  | 1.850561  | -0.388916 | 0.017833  | -0.651861 |
| N22  | 0.276118  | 2.061557  | -0.022788 | -0.775729 |
| C23  | -2.921881 | 4.088656  | -0.080302 | 0.014824  |
| C24  | -3.759158 | 4.405523  | 1.001120  | -0.153585 |
| C25  | -4.541423 | 5.560522  | 0.982124  | -0.134366 |
| C26  | -4.501989 | 6.417083  | -0.119705 | -0.124713 |
| C27  | -3.674747 | 6.111973  | -1.202008 | -0.134466 |
| C28  | -2.889521 | 4.958690  | -1.181622 | -0.157266 |
| C29  | 4.004794  | 2.755874  | 0.068433  | 0.038178  |
| C30  | 4.462567  | 3.401110  | -1.087904 | -0.145167 |
| C31  | 5.597201  | 4.212429  | -1.045151 | -0.131503 |
| C32  | 6.283894  | 4.393161  | 0.156054  | -0.122531 |
| C33  | 5.830959  | 3.758481  | 1.314216  | -0.130550 |
| C34  | 4.699009  | 2.945851  | 1.270540  | -0.130890 |
| C35  | 4.165666  | -0.206518 | -0.074856 | 0.578837  |
| O36  | 5.317082  | 0.138658  | -0.128240 | -0.455749 |
| O37  | 3.798529  | -1.548760 | -0.087194 | -0.504098 |
| C38  | 2.709586  | -4.073733 | -0.052756 | 0.064225  |
| C39  | 3.656240  | -4.313882 | 0.955710  | -0.133014 |
| C40  | 4.465038  | -5.447998 | 0.917265  | -0.135826 |
| C41  | 4.345034  | -6.363154 | -0.130783 | -0.123417 |
| C42  | 3.411701  | -6.133923 | -1.142279 | -0.135405 |
| C43  | 2.602301  | -4.998055 | -1.104279 | -0.160683 |
| C44  | -4.255799 | -2.775775 | 0.072854  | 0.016512  |
| C45  | -4.578328 | -3.643841 | -0.982382 | -0.158883 |
| C46  | -5.740267 | -4.415616 | -0.942171 | -0.134531 |

|     |           |           |           |           |
|-----|-----------|-----------|-----------|-----------|
| C47 | -6.598781 | -4.334196 | 0.155443  | -0.124988 |
| C48 | -6.288941 | -3.475142 | 1.211751  | -0.134249 |
| C49 | -5.128656 | -2.701898 | 1.170404  | -0.154366 |
| H50 | -4.886980 | -2.038715 | 1.996151  | 0.143497  |
| H51 | 0.064892  | 1.069781  | -0.033214 | 0.412450  |
| H52 | -0.365808 | -1.086913 | -0.068941 | 0.411397  |
| H53 | 0.235495  | -5.268751 | 0.255396  | 0.164473  |
| H54 | -0.461254 | 5.261948  | 0.123489  | 0.161001  |
| H55 | 2.170561  | 4.738398  | 0.163478  | 0.164218  |
| H56 | -2.396709 | -4.778979 | 0.296926  | 0.162867  |
| H57 | -5.388374 | -0.362785 | -0.276237 | 0.148466  |
| H58 | -4.878146 | 2.267472  | -0.332168 | 0.149039  |
| H59 | 3.755643  | -3.606664 | 1.773238  | 0.137622  |
| H60 | -3.787136 | 3.743087  | 1.861576  | 0.143537  |
| H61 | -2.252544 | 4.719833  | -2.028675 | 0.142092  |
| H62 | -3.917283 | -3.701740 | -1.842632 | 0.140986  |
| H63 | 1.887905  | -4.815201 | -1.902181 | 0.137109  |
| H64 | 4.349294  | 2.450820  | 2.172384  | 0.132391  |
| H65 | -7.503471 | -4.935319 | 0.187484  | 0.133643  |
| H66 | -5.112239 | 7.316084  | -0.135027 | 0.133782  |
| H67 | 5.190130  | -5.617348 | 1.708743  | 0.134276  |
| H68 | 4.977736  | -7.246157 | -0.160479 | 0.131632  |
| H69 | 3.930149  | 3.258610  | -2.024456 | 0.133361  |
| H70 | 7.167868  | 5.024432  | 0.189832  | 0.129322  |
| H71 | 6.360303  | 3.894740  | 2.253524  | 0.130900  |
| H72 | -5.179251 | 5.792400  | 1.830956  | 0.135213  |
| H73 | -3.642298 | 6.769815  | -2.066486 | 0.135244  |
| H74 | -6.949249 | -3.408760 | 2.072415  | 0.135105  |
| H75 | -5.976300 | -5.076665 | -1.771906 | 0.134855  |
| H76 | 5.944531  | 4.701040  | -1.951700 | 0.130376  |
| H77 | 3.317074  | -6.834491 | -1.967792 | 0.131786  |

---

(a) Optimized using Gaussian03 and B3LYP/6-31G(d) procedures.  
Total energy = -2024.908032160 Hartree. Point Group = c1  
Dipole moment = 4.70230 D (-4.69120, 0.20620, 0.24910)  
Mulliken charges are listed in last column.

**Table S17. Ground State Coordinates of 7aH<sub>2</sub><sup>(a)</sup>**

| Atom | X (Å)     | Y (Å)     | Z (Å)     | Charge    |
|------|-----------|-----------|-----------|-----------|
| C 1  | -4.563760 | -0.328226 | 0.094318  | -0.172821 |
| C 2  | -4.450984 | 1.022767  | 0.037737  | -0.193987 |
| C 3  | -3.027743 | 1.311627  | -0.051020 | 0.311075  |
| C 4  | -2.509128 | 2.628488  | -0.081315 | -0.039632 |
| C 5  | -1.152733 | 2.973222  | -0.055651 | 0.328408  |
| C 6  | -0.596929 | 4.292663  | -0.044768 | -0.171729 |
| C 7  | 0.766370  | 4.183071  | 0.031952  | -0.179036 |
| C 8  | 1.105844  | 2.789787  | 0.042217  | 0.356741  |
| C 9  | 2.412788  | 2.252064  | 0.103077  | -0.054837 |
| C10  | 2.742792  | 0.893532  | 0.067505  | 0.286633  |
| C11  | 4.202459  | 0.406647  | 0.111885  | 0.036185  |
| C12  | 4.041790  | -1.097846 | -0.206453 | 0.030157  |
| C13  | 2.545700  | -1.312970 | -0.048086 | 0.263986  |
| C14  | 2.009146  | -2.602452 | -0.008993 | -0.024331 |
| C15  | 0.637923  | -2.939016 | 0.057165  | 0.338931  |
| C16  | 0.097862  | -4.266431 | 0.064204  | -0.206636 |
| C17  | -1.269625 | -4.173358 | 0.083348  | -0.199487 |
| C18  | -1.622889 | -2.786634 | 0.096700  | 0.317242  |
| C19  | -2.911266 | -2.236730 | 0.087079  | -0.020528 |
| C20  | -3.208851 | -0.854370 | 0.034700  | 0.262668  |
| N21  | -2.293152 | 0.158626  | -0.046194 | -0.682980 |
| N22  | -0.432528 | -2.082681 | 0.084948  | -0.760738 |
| N23  | 1.866566  | -0.140874 | 0.023407  | -0.601963 |
| N24  | -0.079287 | 2.101292  | -0.013726 | -0.776087 |
| C25  | 3.517638  | 3.262687  | 0.249332  | -0.012691 |
| C26  | 4.122921  | 3.471589  | 1.495458  | -0.153465 |
| C27  | 5.132273  | 4.424038  | 1.649900  | -0.137072 |
| C28  | 5.545090  | 5.189328  | 0.559202  | -0.125516 |
| C29  | 4.942830  | 4.996207  | -0.686209 | -0.140559 |
| C30  | 3.939547  | 4.040265  | -0.838740 | -0.107970 |
| O31  | 5.102935  | 1.039464  | -0.769412 | -0.613157 |
| O32  | 4.391820  | -1.344377 | -1.582277 | -0.618703 |
| C33  | 3.491674  | -4.277254 | -1.205750 | -0.111634 |
| C34  | 4.358934  | -5.371045 | -1.190536 | -0.145842 |
| C35  | 4.710960  | -5.974419 | 0.018685  | -0.124997 |
| C36  | 4.187634  | -5.479427 | 1.214254  | -0.138160 |
| C37  | 3.317648  | -4.387356 | 1.197675  | -0.155079 |
| C38  | 2.960283  | -3.769170 | -0.010553 | -0.011590 |
| C39  | -4.052268 | -3.206358 | 0.128380  | 0.019867  |
| C40  | -4.288346 | -3.990075 | 1.268818  | -0.158249 |
| C41  | -5.349500 | -4.895688 | 1.305593  | -0.136924 |
| C42  | -6.191731 | -5.035144 | 0.201169  | -0.123982 |
| C43  | -5.966766 | -4.262087 | -0.939610 | -0.136828 |
| C44  | -4.907256 | -3.355168 | -0.975159 | -0.157442 |
| C45  | -3.487703 | 3.764162  | -0.120134 | 0.015610  |
| C46  | -3.664300 | 4.602818  | 0.991134  | -0.161842 |

|     |           |           |           |           |
|-----|-----------|-----------|-----------|-----------|
| C47 | -4.579148 | 5.656101  | 0.951903  | -0.136151 |
| C48 | -5.331766 | 5.889182  | -0.200430 | -0.125177 |
| C49 | -5.164976 | 5.061488  | -1.312440 | -0.135585 |
| C50 | -4.251481 | 4.007566  | -1.272141 | -0.156077 |
| H51 | -4.121330 | 3.366012  | -2.139114 | 0.144265  |
| H52 | 5.325887  | -1.605660 | -1.597439 | 0.399863  |
| H53 | 4.899036  | 0.655708  | -1.642012 | 0.398616  |
| H54 | -0.171407 | 1.092417  | -0.018242 | 0.401037  |
| H55 | -0.385862 | -1.070577 | 0.056453  | 0.400833  |
| H56 | 1.486507  | 4.985910  | 0.069871  | 0.166080  |
| H57 | 0.693469  | -5.166498 | 0.039649  | 0.159305  |
| H58 | -1.179328 | 5.200926  | -0.084341 | 0.166119  |
| H59 | -1.980740 | -4.985804 | 0.075938  | 0.158630  |
| H60 | -5.466232 | -0.914947 | 0.187303  | 0.147999  |
| H61 | -5.243573 | 1.756194  | 0.074237  | 0.147010  |
| H62 | 3.222989  | -3.805272 | -2.144836 | 0.151766  |
| H63 | -4.731457 | -2.757850 | -1.865270 | 0.146282  |
| H64 | -3.639220 | -3.877547 | 2.132666  | 0.146069  |
| H65 | -3.085337 | 4.418300  | 1.891753  | 0.142411  |
| H66 | 3.479467  | 3.884706  | -1.810839 | 0.132990  |
| H67 | -7.017840 | -5.740590 | 0.229300  | 0.130905  |
| H68 | -6.044000 | 6.709351  | -0.231490 | 0.130621  |
| H69 | 5.386006  | -6.826108 | 0.028629  | 0.126444  |
| H70 | 6.328980  | 5.932672  | 0.678018  | 0.128279  |
| H71 | -6.614731 | -4.366687 | -1.805876 | 0.132760  |
| H72 | -5.744545 | 5.237193  | -2.214923 | 0.132568  |
| H73 | -4.706150 | 6.291528  | 1.824459  | 0.131976  |
| H74 | -5.520003 | -5.488898 | 2.200190  | 0.132640  |
| H75 | 4.453222  | -5.943490 | 2.160568  | 0.127437  |
| H76 | 5.259263  | 5.587304  | -1.541813 | 0.129751  |
| H77 | 5.589451  | 4.572175  | 2.624910  | 0.128885  |
| H78 | 2.906242  | -4.006630 | 2.129041  | 0.136392  |
| H79 | 4.757296  | -5.754791 | -2.126393 | 0.127200  |
| H80 | 3.791323  | 2.889875  | 2.352095  | 0.135923  |
| H81 | 4.632449  | -1.742581 | 0.449230  | 0.141166  |
| H82 | 4.605170  | 0.549967  | 1.120338  | 0.159754  |

---

(a) Optimized using Gaussian03 and B3LYP/6-31G(d) procedures.  
Total energy = -2065.374775390 Hartree. Point Group = c1  
Dipole moment = 0.82620 D (-0.48040, -0.58770, 0.32640)  
Mulliken charges are listed in last column.

**Table S18. Ground State Coordinates of 10aH<sub>2</sub><sup>(a)</sup>**

| Atom | X (Å)     | Y (Å)     | Z (Å)     | Charge    |
|------|-----------|-----------|-----------|-----------|
| C 1  | 4.296519  | 1.153434  | 0.168147  | -0.183171 |
| C 2  | 4.452200  | -0.194803 | 0.133045  | -0.186908 |
| C 3  | 3.117668  | -0.758029 | 0.002834  | 0.297649  |
| C 4  | 2.871968  | -2.158265 | -0.045927 | -0.041481 |
| C 5  | 1.612000  | -2.759785 | -0.039390 | 0.339166  |
| C 6  | 1.307008  | -4.159041 | -0.127097 | -0.183949 |
| C 7  | -0.052459 | -4.307388 | -0.073890 | -0.200195 |
| C 8  | -0.643794 | -3.002395 | 0.038306  | 0.364883  |
| C 9  | -2.020873 | -2.708547 | 0.089522  | -0.110873 |
| C10  | -2.527989 | -1.401084 | 0.051685  | 0.577238  |
| C11  | -2.798320 | 0.744389  | -0.081315 | 0.265350  |
| C12  | -2.586590 | 2.114576  | -0.060603 | -0.054063 |
| C13  | -1.306804 | 2.728117  | -0.030760 | 0.365854  |
| C14  | -1.031684 | 4.129841  | -0.052605 | -0.201349 |
| C15  | 0.332068  | 4.298070  | -0.028631 | -0.187953 |
| C16  | 0.940561  | 3.005776  | 0.016963  | 0.336531  |
| C17  | 2.310838  | 2.702622  | 0.053348  | -0.040430 |
| C18  | 2.869253  | 1.404260  | 0.053766  | 0.294789  |
| N19  | 2.172410  | 0.225061  | -0.030916 | -0.690183 |
| N20  | 0.394584  | -2.107172 | 0.050823  | -0.783818 |
| N21  | -1.864899 | -0.243699 | -0.049812 | -0.629952 |
| N22  | -0.095081 | 2.089871  | 0.007819  | -0.776859 |
| C23  | 3.246575  | 3.872282  | 0.093604  | 0.016033  |
| C24  | 3.293803  | 4.716588  | 1.213951  | -0.156383 |
| C25  | 4.163658  | 5.807257  | 1.249125  | -0.134865 |
| C26  | 4.998309  | 6.074548  | 0.162604  | -0.125255 |
| C27  | 4.959451  | 5.242887  | -0.958205 | -0.134649 |
| C28  | 4.092177  | 4.150538  | -0.991877 | -0.152958 |
| C29  | 4.906975  | -3.076209 | -1.217068 | -0.153561 |
| C30  | 6.006378  | -3.932804 | -1.274710 | -0.134550 |
| C31  | 6.275155  | -4.803414 | -0.216551 | -0.125484 |
| C32  | 5.436680  | -4.811779 | 0.899295  | -0.134909 |
| C33  | 4.335494  | -3.956182 | 0.955662  | -0.159057 |
| C34  | 4.054078  | -3.076264 | -0.101468 | 0.017988  |
| C35  | -2.986680 | -3.846864 | 0.173593  | 0.065329  |
| C36  | -2.943183 | -4.743015 | 1.253334  | -0.162525 |
| C37  | -3.830676 | -5.817573 | 1.329088  | -0.136221 |
| C38  | -4.781843 | -6.012625 | 0.327226  | -0.125480 |
| C39  | -4.839900 | -5.124440 | -0.749438 | -0.139121 |
| C40  | -3.952203 | -4.052748 | -0.825182 | -0.138666 |
| C41  | -4.180662 | 0.114849  | -0.137170 | 0.263211  |
| C42  | -3.770997 | 3.037916  | -0.011356 | -0.006306 |
| C43  | -4.541407 | 3.309804  | -1.151905 | -0.134449 |
| C44  | -5.624993 | 4.187182  | -1.084637 | -0.140862 |
| C45  | -5.958343 | 4.804429  | 0.122404  | -0.125609 |
| C46  | -5.200469 | 4.540849  | 1.264739  | -0.135554 |



|     |           |           |           |           |
|-----|-----------|-----------|-----------|-----------|
| C47 | -4.114779 | 3.666455  | 1.196446  | -0.154484 |
| O48 | -4.711168 | 0.246347  | -1.431682 | -0.589216 |
| O49 | -3.892301 | -1.253531 | 0.150551  | -0.519136 |
| H50 | -4.885680 | 0.471223  | 0.621024  | 0.153394  |
| H51 | -5.620305 | -0.095461 | -1.414213 | 0.400508  |
| H52 | 0.304357  | -1.097540 | 0.073823  | 0.408388  |
| H53 | 0.045481  | 1.085735  | -0.009623 | 0.410933  |
| H54 | -0.614153 | -5.227514 | -0.129464 | 0.158993  |
| H55 | 0.874914  | 5.231127  | -0.049442 | 0.156852  |
| H56 | 2.045219  | -4.940096 | -0.231188 | 0.159173  |
| H57 | -1.787040 | 4.900236  | -0.094688 | 0.155488  |
| H58 | 5.064820  | 1.905014  | 0.278223  | 0.143974  |
| H59 | 5.371783  | -0.756546 | 0.211417  | 0.143571  |
| H60 | -4.287637 | 2.825881  | -2.088603 | 0.150472  |
| H61 | -4.001689 | -3.364394 | -1.663426 | 0.136407  |
| H62 | 4.060092  | 3.507252  | -1.866575 | 0.143125  |
| H63 | 4.697703  | -2.402890 | -2.043393 | 0.143088  |
| H64 | 2.650292  | 4.506627  | 2.063682  | 0.140398  |
| H65 | 3.690845  | -3.957134 | 1.830158  | 0.139797  |
| H66 | -2.212422 | -4.587725 | 2.042290  | 0.136094  |
| H67 | 5.674914  | 6.924555  | 0.189273  | 0.131063  |
| H68 | 7.132672  | -5.469523 | -0.261121 | 0.130937  |
| H69 | -5.474077 | -6.848492 | 0.384901  | 0.127947  |
| H70 | 5.602762  | 5.445590  | -1.810470 | 0.132959  |
| H71 | -6.802659 | 5.487042  | 0.172460  | 0.129768  |
| H72 | -3.522819 | 3.464978  | 2.085451  | 0.136787  |
| H73 | 6.651455  | -3.922190 | -2.149414 | 0.132811  |
| H74 | 4.191254  | 6.445572  | 2.128411  | 0.132414  |
| H75 | 5.641515  | -5.480928 | 1.730950  | 0.132198  |
| H76 | -5.452597 | 5.015348  | 2.209582  | 0.131077  |
| H77 | -3.781436 | -6.497659 | 2.175609  | 0.129249  |
| H78 | -6.208033 | 4.390406  | -1.979283 | 0.130752  |
| H79 | -5.575900 | -5.269911 | -1.536111 | 0.127846  |

---

(a) Optimized using Gaussian03 and B3LYP/6-31G(d) procedures.  
Total energy = -2026.088614950 Hartree. Point Group = c1  
Dipole moment = 1.23150 D (-1.05780, 0.30850, 0.55000)  
Mulliken charges are listed in last column.

**Table S19. Ground State Coordinates of 12aH<sub>2</sub><sup>(a)</sup>**

| Atom | X (Å)     | Y (Å)     | Z (Å)     | Charge    |
|------|-----------|-----------|-----------|-----------|
| C 1  | -4.316619 | -0.472066 | 0.206606  | -0.184483 |
| C 2  | -4.245435 | 0.884757  | 0.185419  | -0.188509 |
| C 3  | -2.839470 | 1.218847  | 0.034883  | 0.295254  |
| C 4  | -2.364981 | 2.559621  | -0.022337 | -0.039657 |
| C 5  | -1.025175 | 2.947674  | -0.049378 | 0.337009  |
| C 6  | -0.499632 | 4.278016  | -0.162696 | -0.182998 |
| C 7  | 0.866828  | 4.204905  | -0.145466 | -0.201607 |
| C 8  | 1.242647  | 2.822442  | -0.025029 | 0.366682  |
| C 9  | 2.556631  | 2.314672  | 0.008763  | -0.120725 |
| C10  | 2.850031  | 0.942382  | 0.007948  | 0.576613  |
| C11  | 2.747994  | -1.224809 | -0.027505 | 0.259445  |
| C12  | 2.304613  | -2.539189 | -0.045324 | -0.076292 |
| C13  | 0.944241  | -2.939034 | -0.042765 | 0.374080  |
| C14  | 0.447150  | -4.278160 | -0.100545 | -0.206240 |
| C15  | -0.926091 | -4.225321 | -0.080704 | -0.186526 |
| C16  | -1.319682 | -2.853510 | -0.002590 | 0.332856  |
| C17  | -2.619455 | -2.330378 | 0.042423  | -0.039173 |
| C18  | -2.954626 | -0.955442 | 0.066135  | 0.291878  |
| N19  | -2.071574 | 0.091569  | -0.020008 | -0.689912 |
| N20  | -0.147922 | -2.115794 | 0.012937  | -0.778170 |
| N21  | 1.998902  | -0.092692 | -0.031207 | -0.618547 |
| N22  | 0.074462  | 2.107067  | 0.022831  | -0.785025 |
| C23  | -3.380724 | 3.660200  | -0.054842 | 0.017672  |
| C24  | -3.489063 | 4.573136  | 1.005944  | -0.158631 |
| C25  | -4.434011 | 5.599648  | 0.971326  | -0.134771 |
| C26  | -5.285683 | 5.732331  | -0.126464 | -0.125630 |
| C27  | -5.188322 | 4.830258  | -1.187994 | -0.134595 |
| C28  | -4.245818 | 3.802590  | -1.151698 | -0.153314 |
| C29  | -4.627852 | -3.424002 | -1.018600 | -0.152907 |
| C30  | -5.665877 | -4.355907 | -1.005733 | -0.134764 |
| C31  | -5.833991 | -5.205031 | 0.089847  | -0.125338 |
| C32  | -4.956356 | -5.116950 | 1.171749  | -0.134981 |
| C33  | -3.915502 | -4.187458 | 1.157017  | -0.157315 |
| C34  | -3.737041 | -3.327419 | 0.062108  | 0.017982  |
| C35  | 3.340892  | -3.625581 | -0.055410 | 0.006562  |
| C36  | 4.039811  | -3.940204 | -1.231272 | -0.159088 |
| C37  | 5.012944  | -4.940809 | -1.239351 | -0.132166 |
| C38  | 5.300890  | -5.647136 | -0.070130 | -0.125521 |
| C39  | 4.609825  | -5.348299 | 1.105542  | -0.132650 |
| C40  | 3.639095  | -4.345258 | 1.112463  | -0.154477 |
| C41  | 4.218575  | -0.845390 | 0.021185  | -0.084337 |
| O42  | 4.171696  | 0.583727  | 0.050168  | -0.509783 |
| C43  | 3.692656  | 3.287058  | 0.049419  | 0.067078  |
| C44  | 3.830501  | 4.177429  | 1.125908  | -0.161162 |
| C45  | 4.878691  | 5.098162  | 1.164686  | -0.135802 |
| C46  | 5.811881  | 5.141441  | 0.128286  | -0.125831 |

|     |           |           |           |           |
|-----|-----------|-----------|-----------|-----------|
| C47 | 5.689141  | 4.257708  | -0.946270 | -0.137330 |
| C48 | 4.640278  | 3.340545  | -0.984925 | -0.134821 |
| H49 | 4.548943  | 2.656917  | -1.823720 | 0.130433  |
| H50 | 0.003905  | 1.096761  | 0.059454  | 0.407087  |
| H51 | -0.130284 | -1.102030 | 0.017556  | 0.409219  |
| H52 | 1.567986  | 5.021755  | -0.226321 | 0.158305  |
| H53 | -1.104020 | 5.167497  | -0.260749 | 0.158873  |
| H54 | -1.611396 | -5.058789 | -0.122916 | 0.156386  |
| H55 | 1.069588  | -5.158860 | -0.158654 | 0.151882  |
| H56 | -5.058103 | 1.590088  | 0.282809  | 0.142472  |
| H57 | -5.198383 | -1.085557 | 0.323300  | 0.142666  |
| H58 | -4.497242 | -2.765431 | -1.872526 | 0.143154  |
| H59 | -4.169820 | 3.103831  | -1.979958 | 0.142800  |
| H60 | -3.238432 | -4.115419 | 2.003624  | 0.140317  |
| H61 | -2.832938 | 4.466614  | 1.865317  | 0.139775  |
| H62 | 3.111853  | 4.139357  | 1.940082  | 0.135164  |
| H63 | 6.057400  | -6.427355 | -0.075696 | 0.133032  |
| H64 | -6.643991 | -5.929558 | 0.100701  | 0.130841  |
| H65 | -6.021086 | 6.532060  | -0.154443 | 0.130653  |
| H66 | 3.102794  | -4.113151 | 2.028883  | 0.139428  |
| H67 | 6.629759  | 5.856668  | 0.157662  | 0.127627  |
| H68 | -6.342278 | -4.419664 | -1.854188 | 0.132654  |
| H69 | 5.541036  | -5.172468 | -2.160717 | 0.134031  |
| H70 | 4.827193  | -5.894700 | 2.019702  | 0.134228  |
| H71 | -5.844963 | 4.928078  | -2.048660 | 0.132393  |
| H72 | -5.083156 | -5.769382 | 2.031840  | 0.132125  |
| H73 | -4.506629 | 6.292757  | 1.805501  | 0.131989  |
| H74 | 6.410189  | 4.285190  | -1.759311 | 0.128248  |
| H75 | 4.968184  | 5.776854  | 2.009134  | 0.128691  |
| H76 | 3.806863  | -3.401403 | -2.146467 | 0.137146  |
| H77 | 4.790300  | -1.168253 | -0.856511 | 0.172371  |
| H78 | 4.732619  | -1.212091 | 0.918279  | 0.175975  |

---

(a) Optimized using Gaussian03 and B3LYP/6-31G(d) procedures.  
Total energy = -1950.871519550 Hartree. Point Group = c1  
Dipole moment = 1.36150 D (0.67030, -1.18500, -0.01630)  
Mulliken charges are listed in last column.
